# Supplementary material for: 映像文化とはなにか(110)戦前、戦中期の松竹大船女性映画を再び
Source: Royal Society of Chemistry journal article supplement (doi:10.1039/d3ra06404b), 2014-07-01
Supplement: d3ra06404b2.pdf [file d3ra06404b2.pdf]

|                    |                                                                                   |                       |
|--------------------|-----------------------------------------------------------------------------------|-----------------------|
| X'Pert HighScore   | <b>X'Pert HighScore Report</b>                                                    | date: 10/20/23        |
| <b>PANalytical</b> |  | for internal use only |

## Fantastic report on Document1

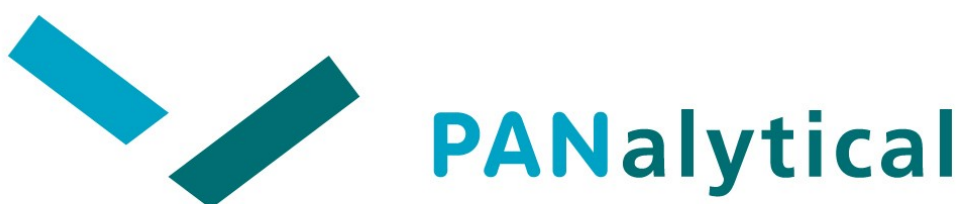

### Distribution:

| Name     | Function                         | 0.1 | 0.5 | 1.0 |
|----------|----------------------------------|-----|-----|-----|
| N.N.-999 | Masterking Group Manager (MGM)   | ✓   |     |     |
| N.N.-998 | Product Ontwikkelt Manager (POM) | ✓   |     |     |
| N.N.-1   | (AS)                             |     |     | ✓   |
| N.N.-2   | (DS)                             |     |     | ✓   |
| N.N.-3   | (BS)                             |     |     | ✓   |
| T.P.     | Supervisor All Coding            |     |     | ✓   |

|                                                |       |                      |                   |
|------------------------------------------------|-------|----------------------|-------------------|
| Last saved by CWI                              | Draft | file: program5 1.doc | rev: 1            |
| © 2023 PANalytical B.V.<br>All Rights Reserved |       |                      | No. of pages: 1/8 |

**Table of Contents:**

|                                                      |          |
|------------------------------------------------------|----------|
| <b>TABLE OF CONTENTS:</b> .....                      | <b>2</b> |
| <b>ANCHOR SCAN PARAMETERS: (BOOKMARK1)</b> .....     | <b>3</b> |
| <b>GRAPHICS: (BOOKMARK2)</b> .....                   | <b>3</b> |
| <b>PEAK LIST: (BOOKMARK 3)</b> .....                 | <b>3</b> |
| <b>IDENTIFIED PATTERNS LIST: (BOOKMARK4)</b> .....   | <b>3</b> |
| <b>PLOT OF IDENTIFIED PHASES: (BOOKMARK 5)</b> ..... | <b>3</b> |
| <b>DOCUMENT HISTORY: (BOOKMARK 6)</b> .....          | <b>3</b> |

**Anchor Scan Parameters:** (Bookmark1)

|                                                |                                                        |
|------------------------------------------------|--------------------------------------------------------|
| Dataset Name                                   | program5_1                                             |
| File name                                      | E:\X'Pert Data\2023\7\khaled el attar\program5_1.xrdml |
| Comment                                        | Configuration=Stage Flat Samples, Owner=r, Creation    |
| date=2/28/2009 2:36:26 PM                      | Goniometer=PW3050/60 (Theta/Theta); Minimum step size  |
| 2Theta:0.001; Minimum step size                | Omega:0.001                                            |
|                                                | Sample stage=PW3071/xx Bracket                         |
|                                                | Diffraction system=XPRT-PRO                            |
|                                                | Measurement program=program5, Owner=r, Creation        |
| date=12/12/2004 11:02:06 AM                    |                                                        |
| Measurement Date / Time                        | 7/13/2023 10:11:01 AM                                  |
| Operator                                       | cwi                                                    |
| Raw Data Origin                                | XRD measurement (*.XRDML)                              |
| Scan Axis                                      | Gonio                                                  |
| Start Position [ $^{\circ}2\text{Th.}$ ]       | 5.0150                                                 |
| End Position [ $^{\circ}2\text{Th.}$ ]         | 89.9750                                                |
| Step Size [ $^{\circ}2\text{Th.}$ ]            | 0.0300                                                 |
| Scan Step Time [s]                             | 0.8500                                                 |
| Scan Type                                      | Continuous                                             |
| Offset [ $^{\circ}2\text{Th.}$ ]               | 0.0000                                                 |
| Divergence Slit Type                           | Fixed                                                  |
| Divergence Slit Size [ $^{\circ}$ ]            | 0.4785                                                 |
| Specimen Length [mm]                           | 10.00                                                  |
| Receiving Slit Size [mm]                       | 0.1000                                                 |
| Measurement Temperature [ $^{\circ}\text{C}$ ] | 25.00                                                  |
| Anode Material                                 | Cu                                                     |
| K-Alpha1 [ $\text{\AA}$ ]                      | 1.54060                                                |
| K-Alpha2 [ $\text{\AA}$ ]                      | 1.54443                                                |
| K-Beta [ $\text{\AA}$ ]                        | 1.39225                                                |
| K-A2 / K-A1 Ratio                              | 0.50000                                                |
| Generator Settings                             | 30 mA, 40 kV                                           |
| Diffraction Type                               | 0000000000005545                                       |
| Diffraction Number                             | 0                                                      |
| Goniometer Radius [mm]                         | 240.00                                                 |
| Dist. Focus-Diverg. Slit [mm]                  | 91.00                                                  |
| Incident Beam Monochromator                    | No                                                     |
| Spinning                                       | No                                                     |

**Graphics:** (Bookmark2)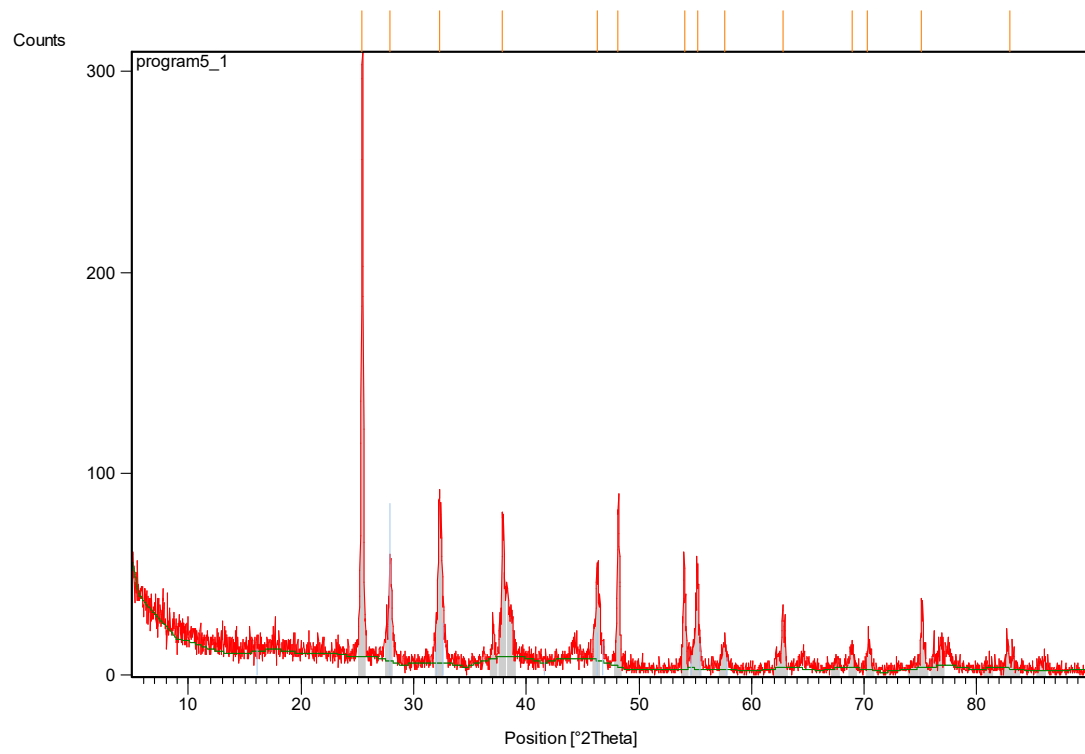

**Peak List:** (Bookmark 3)

| Pos.<br>[°2Th.] | Height<br>[cts] | FWHM<br>[°2Th.] | d-spacing<br>[Å] | Rel. Int.<br>[%] | Tip width<br>[°2Th.] | Matched<br>by |
|-----------------|-----------------|-----------------|------------------|------------------|----------------------|---------------|
| 25.4282         | 294.02          | 0.1771          | 3.50289          | 100.00           | 0.2125               | 01-073-1764   |
| 27.9393         | 51.89           | 0.2362          | 3.19350          | 17.65            | 0.2834               | 00-006-0480   |
| 32.3090         | 81.99           | 0.3542          | 2.77088          | 27.89            | 0.4251               | 00-006-0480   |
| 37.8764         | 72.28           | 0.1771          | 2.37542          | 24.58            | 0.2125               | 01-073-1764   |
| 46.2968         | 45.27           | 0.4133          | 1.96110          | 15.40            | 0.4959               | 00-006-0480   |
| 48.1503         | 75.29           | 0.1771          | 1.88985          | 25.61            | 0.2125               | 01-073-1764   |
| 54.0300         | 46.50           | 0.2362          | 1.69726          | 15.82            | 0.2834               | 01-073-1764   |
| 55.1796         | 50.89           | 0.2362          | 1.66459          | 17.31            | 0.2834               | 01-073-1764   |
| 57.5827         | 12.51           | 0.4723          | 1.60071          | 4.25             | 0.5668               | 00-006-0480   |
| 62.7931         | 28.94           | 0.3542          | 1.47984          | 9.84             | 0.4251               | 01-073-1764   |
| 68.8952         | 10.12           | 0.3542          | 1.36292          | 3.44             | 0.4251               | 01-073-1764   |
| 70.3194         | 10.57           | 0.3542          | 1.33876          | 3.59             | 0.4251               | 01-073-1764   |
| 75.1116         | 25.78           | 0.1771          | 1.26480          | 8.77             | 0.2125               | 01-073-1764   |
| 82.9333         | 6.21            | 0.8640          | 1.16327          | 2.11             | 1.0368               | 01-073-1764   |

**Identified Patterns List:** (Bookmark4)

| Visible | Ref. Code   | Score | Compound Name      | Displacement [°2Th.] | Scale Factor | Chemical Formula  |
|---------|-------------|-------|--------------------|----------------------|--------------|-------------------|
| *       | 01-073-1764 | 65    | Anatase, syn       | 0.000                | 0.668        | Ti O <sub>2</sub> |
| *       | 00-006-0480 | 57    | Chlorargyrite, syn | 0.000                | 0.228        | Ag Cl             |

**Plot of Identified Phases:** (Bookmark 5)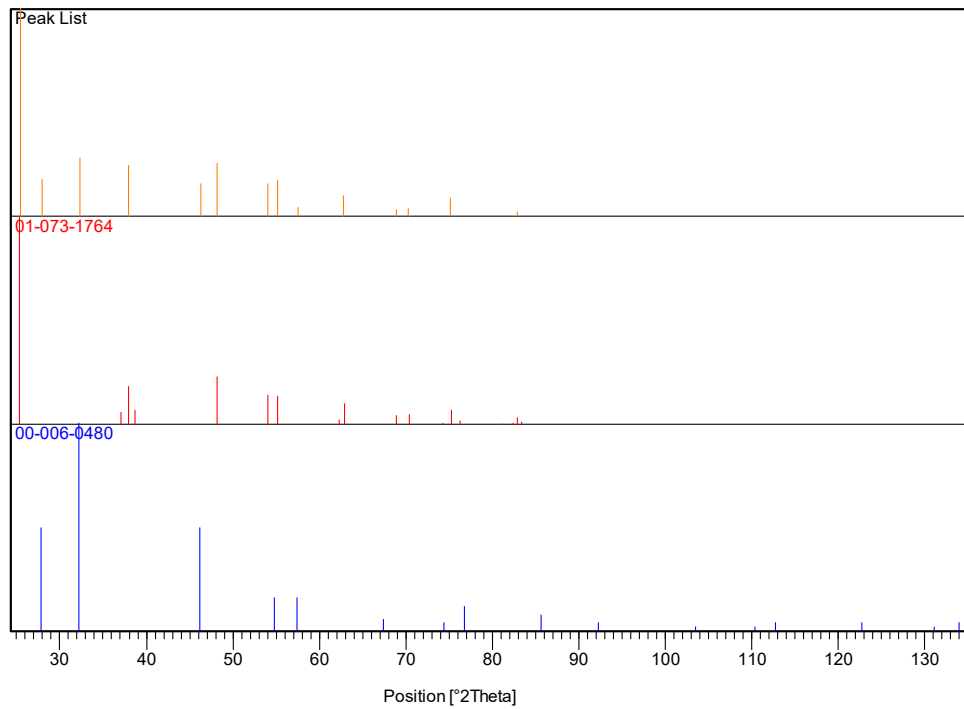

**Document History:** (Bookmark 6)

## Insert Measurement:

- File name = "program5\_1.xrdml"
- Modification time = "7/19/2023 9:53:48 AM"
- Modification editor = "cwi"

## Default properties:

- Measurement step axis = "None"
- Internal wavelengths used from anode material: Copper (Cu)
- Original K-Alpha1 wavelength = "1.54060"
- Used K-Alpha1 wavelength = "1.54060"
- Original K-Alpha2 wavelength = "1.54443"
- Used K-Alpha2 wavelength = "1.54443"
- Original K-Beta wavelength = "1.39225"
- Used K-Beta wavelength = "1.39225"
- Incident beam monochromator = "No"
- Dist. focus to div. slit = "91.00000"
- Irradiated length = "10.00000"
- Spinner used = "No"
- Receiving slit size = "0.10000"
- Linear detector mode = "None"
- Length linear detector = "2"
- Step axis value = "0.00000"
- Offset = "0.00000"
- Sample length = "10.00000"
- Modification time = "7/19/2023 9:53:48 AM"
- Modification editor = "cwi"

## Determine Background:

- Correction method = "Automatic"
- Bending factor = "5"
- Use smoothed input data = "Yes"
- Granularity = "20"
- Add to net scan = "Nothing"
- Modification time = "2/22/2001 10:17:43 AM"
- Modification editor = "PANalytical"

## Search Peaks:

- Minimum significance = "2.00"
- Minimum tip width = "0.01"
- Maximum tip width = "1.00"
- Peak base width = "2.00"
- Method = "Minimum 2nd derivative"
- Modification time = "2/20/2001 11:55:18 AM"
- Modification editor = "PANalytical"

## Search &amp; Match:

- Data source = "Profile and peak list"
- Restriction = "None"
- Scoring schema = "Multi phase"
- Auto residue = "Yes"

- Match intensity = "Yes"
- Demote unmatched strong = "Yes"
- Allow pattern shift = "No"
- Two theta shift = "0"
- Identify = "Yes"
- Max. no. of accepted patterns = "5"
- Minimum score = "27"
- Search depth = "6"
- Min. new lines / total lines = "40"
- Minimum new lines = "3"
- Minimum scale factor = "0.06"
- Modification time = "2/16/2001 11:03:07 AM"
- Modification editor = "PANalytical"
