# Supplementary material for: 映像文化とはなにか(110)戦前、戦中期の松竹大船女性映画を再び
Source: Royal Society of Chemistry journal article supplement (doi:10.1039/d3ra06404b), 2014-07-01
Supplement: d3ra06404b3.pdf [file d3ra06404b3.pdf]

## Supplementary data

### 1. Reagents & Instruments

**For antioxidant activity:** The antioxidant activity was run at the Unit of genetic engineering and biotechnology, Faculty of Science, Mansoura University. The analyses were run at unit of genetic engineering and biotechnology, Mansoura University using Spectrophotometric apparatus (Spekol 11 spectrophotometer, analytic Jena AG, Jena, Germany). UV lamp (Vilber Lourmat-6.LC, VILBER Smart Imaging, Marne-la-Vallée, France). 1,1-Diphenyl-2-picrylhydrazyl (DPPH<sup>•</sup>), ascorbic acid, sulfuric acid, sodium phosphate, ammonium heptamolybdate, and DMSO were purchased from Sigma Aldrich (St. Louis, USA).

**Characterization of the nanocatalyst:** The FTIR analyses were run on Thermo-Fisher Nicolet IS10, USA Spectrophotometer in the range of 400-4000 cm<sup>-1</sup> in transmission attitude.

Zeta potential analyses were run on HORIBA SZ-100 with a holder (24.8 °C), dispersion medium viscosity (0.898 mPa.s), conductivity (0.289 mS/cm), and electrode voltage (3.3 V).

The SEM analysis was run on SEM-type FEI Czech (accelerating voltage at 25 kV).

The TEM analyses were run on a (Thermoscientific, Talos F200i) using the carbon-coated grid (Type G 200, 3.05 μ diameter, TAAP, USA).

**Characterization of the synthesized compounds:** Elemental microanalyses were carried out at Microanalytical Unit, Faculty of Science, Cairo University. Perkin-Elmer 1000 FT-IR infrared spectrometer (horizontal attenuated total reflection (HATR)) was used to record the Infrared spectra. The commercial reagents and solvents were acquired and utilized in their form. The distilled solvents were used as freshly prepared ones to accomplish the reactions. The mass spectra had been recorded on Kratos MS apparatus and the ionizing voltage was 70 ev. DEPT spectra are displayed in the upside direction because they are caused by the positive signal of the carbon-13 nuclei. DEPT spectra are a type of <sup>13</sup>C NMR experiment that can be used to distinguish between different types of carbon atoms, such as primary, secondary, tertiary, and quaternary carbons. The angle of the DEPT experiment is typically set to 90° or 135°. A 90° DEPT experiment will produce a spectrum with positive peaks for primary and tertiary carbons and negative peaks for secondary and quaternary carbons. A 135° DEPT experiment will produce a spectrum with positive peaks for primary and quaternary carbons and negative peaks for secondary and tertiary carbons.

Here is a diagram that shows the different types of carbon atoms and the signals they produce in DEPT spectra:

Carbon type | 90° DEPT | 135° DEPT

----- | ----- | -----

Primary | Positive | Positive

Secondary | Negative | Negative

Tertiary | Positive | Negative

Quaternary | Negative | Positive

## 2. Procedures of Antioxidant Activity

### 2.1. DPPH<sup>•</sup> assay

The antioxidant activity of the newly synthesized benzopyrimido[4,5-*d*]azoninone derivatives was evaluated by DPPH<sup>•</sup> assay [1]. A solution of DPPH<sup>•</sup> (0.135 mM) was used as a positive control, methanol (80%) as a negative control, and ascorbic acid as a reference standard. The samples were prepared in a serial dilution using methanol (80%). DPPH<sup>•</sup> solution (1 mL) was added to each tube and then incubated at room temperature for 30 min. The absorbance of each tube was recorded at 517 nm of wavelength ( $\lambda$ ). The exponential curves were plotted for the % DPPH<sup>•</sup> remaining versus the sample concentration to estimate the values of IC<sub>50</sub> in mg/mL. The values of IC<sub>50</sub> were calculated to rationalize the comparison between the results of the investigated samples, in which an inverse relationship between the antioxidant capacity of the sample with the IC<sub>50</sub> values [2]. The percentages of remaining DPPH<sup>•</sup> were calculated from Equation (1):

$$\text{Remaining DPPH}^{\bullet} (\%) = (DPPH^{\bullet})_T / (DPPH^{\bullet})_{T=0} \times 100 \quad \text{Equation (1)}$$

### 2.2. Phosphomolybdate assay

The total antioxidant capacity was assessed by the phosphomolybdate method to investigate the antioxidant activity of the synthesized benzopyrimido[4,5-*d*]azoninone derivatives. A modified procedure was applied, in which the results were expressed as mg ascorbic acid equivalent per 100 grams of dry sample [3]. A freshly prepared reagent (0.6 M sulfuric acid, 28 mM sodium phosphate, 4 mM ammonium molybdate) was used. 3 mL of the standard reagent was mixed with 300  $\mu$ L of the tested sample and incubated for 90 min at 95 °C. The intensity in the blue color of the samples was measured at  $\lambda = 695$  nm. A negative control was prepared by mixing the standard reagent with 300  $\mu$ L of distilled water instead of the tested sample [4].

## References

- [1] Kitts, D.D.; Wijewickreme, A.N.; Hu, C. Antioxidant properties of a North American ginseng extract. *Molecular and cellular biochemistry* 2000, 203, 1-10.
- [2] Parejo, I.; Codina, C.; Petrakis, C.; Kefalas, P. Evaluation of scavenging activity assessed by Co (II)/EDTA-induced luminol chemiluminescence and DPPH<sup>•</sup>-(2,2-diphenyl-1-picrylhydrazyl) free radical assay. *Journal of Pharmacological and toxicological Methods* 2000, 44, 507-512.
- [3] Prieto, P.; Pineda, M.; Aguilar, M. Spectrophotometric quantitation of antioxidant capacity through the formation of a phosphomolybdenum complex: specific application to the determination of vitamin E. *Analytical biochemistry* 1999, 269, 337-341.
- [4] Belyagoubi-Benhammou, N.; Belyagoubi, L.; Gismondi, A.; Di Marco, G.; Canini, A.; Atik Bekkara, F. GC/MS analysis, and antioxidant and antimicrobial activities of alkaloids extracted by polar and a polar solvents from the stems of *Anabasis articulata*. *Medicinal Chemistry Research* 2019, 28, 754-767.

## Antioxidant results

**Table S1.** The results antioxidant activity expressed as % Remaining DPPH and % Scavenging activity at different concentrations of the tested samples.

| Sample    | Ar                                                   | Concentrations (mg/mL) | % Remaining DPPH | % Scavenging activity |
|-----------|------------------------------------------------------|------------------------|------------------|-----------------------|
| <b>3a</b> | C <sub>6</sub> H <sub>5</sub>                        | 0.212                  | 26.28            | 73.72                 |
|           |                                                      | 0.106                  | 43.86            | 56.14                 |
|           |                                                      | 0.053                  | 62.67            | 37.33                 |
|           |                                                      | 0.026                  | 87.56            | 12.44                 |
| <b>3b</b> | 2,4-(Cl) <sub>2</sub> -C <sub>6</sub> H <sub>3</sub> | 0.424                  | 39.04            | 60.96                 |
|           |                                                      | 0.212                  | 58.63            | 41.37                 |
|           |                                                      | 0.106                  | 76.98            | 23.02                 |
|           |                                                      | 0.053                  | 91.14            | 8.865                 |
| <b>3c</b> | 4-Cl-C <sub>6</sub> H <sub>4</sub>                   | 0.524                  | 27.22            | 72.78                 |
|           |                                                      | 0.262                  | 36.55            | 63.45                 |
|           |                                                      | 0.131                  | 56.61            | 43.39                 |
|           |                                                      | 0.066                  | 77.29            | 22.71                 |
| <b>3d</b> | 2,6-(Cl) <sub>2</sub> -C <sub>6</sub> H <sub>3</sub> | 1.104                  | 30.95            | 69.05                 |
|           |                                                      | 0.552                  | 32.66            | 67.34                 |
|           |                                                      | 0.276                  | 54.12            | 45.88                 |
|           |                                                      | 0.138                  | 69.36            | 30.64                 |
| <b>3e</b> | 4-NMe <sub>2</sub> -C <sub>6</sub> H <sub>4</sub>    | 0.313                  | 18.35            | 81.65                 |
|           |                                                      | 0.157                  | 27.22            | 72.78                 |
|           |                                                      | 0.078                  | 46.19            | 53.81                 |
|           |                                                      | 0.039                  | 65.79            | 34.21                 |
| <b>3f</b> | 2-OH-C <sub>6</sub> H <sub>4</sub>                   | 0.096                  | 11.51            | 88.49                 |
|           |                                                      | 0.048                  | 34.84            | 65.16                 |
|           |                                                      | 0.024                  | 57.85            | 42.15                 |
|           |                                                      | 0.012                  | 74.18            | 25.82                 |
| <b>3g</b> | 3,5-(Br) <sub>2</sub> -C <sub>6</sub> H <sub>3</sub> | 0.49                   | 30.64            | 69.36                 |
|           |                                                      | 0.245                  | 58.32            | 41.68                 |
|           |                                                      | 0.123                  | 72.63            | 27.37                 |
|           |                                                      | 0.061                  | 78.07            | 21.93                 |
| <b>3h</b> | 4-OMe-C <sub>6</sub> H <sub>4</sub>                  | 0.214                  | 18.97            | 81.03                 |
|           |                                                      | 0.107                  | 34.37            | 65.63                 |
|           |                                                      | 0.054                  | 49.92            | 50.08                 |
|           |                                                      | 0.027                  | 75.89            | 24.11                 |

|               |                                        |       |       |       |
|---------------|----------------------------------------|-------|-------|-------|
| <b>3i</b>     | 5-Br-benzo[ <i>d</i> ][1,3]dioxol-6-yl | 0.204 | 23.33 | 76.67 |
|               |                                        | 0.102 | 36.08 | 63.92 |
|               |                                        | 0.051 | 58.01 | 41.99 |
|               |                                        | 0.025 | 83.2  | 16.8  |
| <b>3j</b>     | 2-pyridyl                              | 0.12  | 42.3  | 57.7  |
|               |                                        | 0.06  | 55.21 | 44.79 |
|               |                                        | 0.03  | 72.63 | 27.37 |
|               |                                        | 0.015 | 84.29 | 15.71 |
| <b>3k</b>     | 1-naphthyl                             | 0.22  | 23.17 | 76.83 |
|               |                                        | 0.11  | 44.95 | 55.05 |
|               |                                        | 0.055 | 64.39 | 35.61 |
|               |                                        | 0.028 | 75.43 | 24.57 |
| Ascorbic acid | --                                     | 0.062 | 15.27 | 84.73 |
|               |                                        | 0.031 | 39.08 | 60.92 |
|               |                                        | 0.016 | 61.07 | 38.93 |
|               |                                        | 0.008 | 74.81 | 25.19 |

**Table S2.** The results antioxidant activity of the tested samples applying DPPH and phosphomolybdate assays.

| <b>Samples</b> | <b>IC<sub>50</sub> (mg/mL) DPPH Assay <sup>[a]</sup></b> | <b>Total antioxidant capacity (mg AAE/<br/>100 gm DS) <sup>[b]</sup></b> |
|----------------|----------------------------------------------------------|--------------------------------------------------------------------------|
| <b>3a</b>      | 0.099 ±1.34                                              | 5276.654±2.59                                                            |
| <b>3b</b>      | 0.304±3.02                                               | 1966.205±3.74                                                            |
| <b>3c</b>      | 0.204±1.52                                               | 2392.291±1.98                                                            |
| <b>3d</b>      | 0.362±0.97                                               | 1412.344±3.76                                                            |
| <b>3e</b>      | 0.068±3.36                                               | 7017.389±3.38                                                            |
| <b>3f</b>      | 0.03±0.45                                                | 7894.563±2.92                                                            |
| <b>3g</b>      | 0.284±1.57                                               | 2104.67±3.49                                                             |
| <b>3h</b>      | 0.067±2.01                                               | 7575.59±2.86                                                             |
| <b>3i</b>      | 0.08±1.56                                                | 6379.444±4.18                                                            |
| <b>3j</b>      | 0.088±1.08                                               | 5422.528±3.36                                                            |
| <b>3k</b>      | 0.095±2.16                                               | 5342.785±2.70                                                            |

<sup>[a]</sup> The values of IC<sub>50</sub> in mg/mL using DPPH assay. Values are average ( $n = 3$ ) ± SD.

<sup>[b]</sup> mg ascorbic acid equivalent/100 gm dry sample (DS). Values are average ( $n = 3$ ) ± SD.

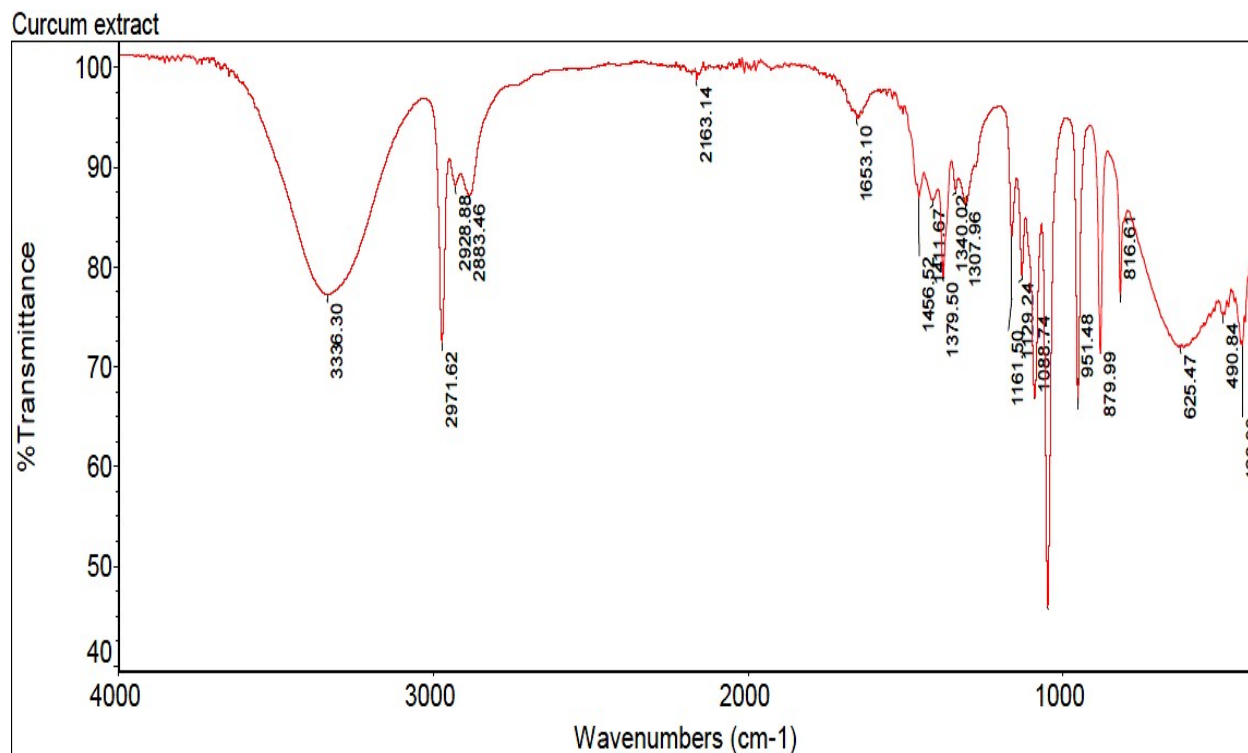

Fig. S1. FTIR analysis of turmeric ethanol extract.

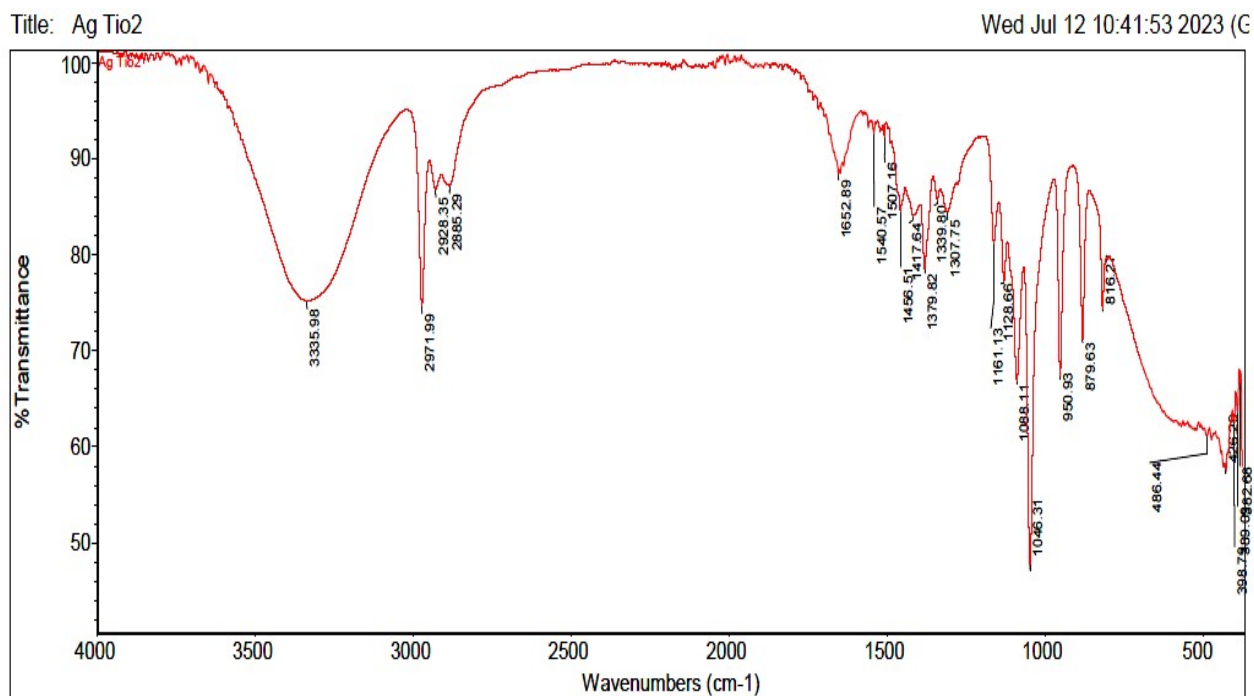

Fig. S2. FTIR analysis of Ag-TiO<sub>2</sub> bmNPs.

|                         |         |            |        |                                 |         |            |        |
|-------------------------|---------|------------|--------|---------------------------------|---------|------------|--------|
| Position:               | 398.36  | Intensity: | 78.865 | Position:                       | 382.68  | Intensity: | 66.557 |
| Position:               | 428.93  | Intensity: | 72.114 | Position:                       | 389.09  | Intensity: | 63.569 |
| Position:               | 490.84  | Intensity: | 75.160 | Position:                       | 398.79  | Intensity: | 62.528 |
| Position:               | 625.47  | Intensity: | 71.833 | Position:                       | 426.29  | Intensity: | 57.599 |
| Position:               | 816.61  | Intensity: | 77.289 | Position:                       | 816.27  | Intensity: | 74.376 |
| Position:               | 879.99  | Intensity: | 71.339 | Position:                       | 879.83  | Intensity: | 71.202 |
| Position:               | 951.48  | Intensity: | 66.896 | Position:                       | 950.93  | Intensity: | 67.319 |
| Position:               | 1046.94 | Intensity: | 45.910 | Position:                       | 1046.31 | Intensity: | 47.693 |
| Position:               | 1088.74 | Intensity: | 66.944 | Position:                       | 1088.11 | Intensity: | 66.860 |
| Position:               | 1129.24 | Intensity: | 79.205 | Position:                       | 1128.66 | Intensity: | 77.230 |
| Position:               | 1161.50 | Intensity: | 83.092 | Position:                       | 1161.13 | Intensity: | 81.111 |
| Position:               | 1307.96 | Intensity: | 86.353 | Position:                       | 1307.75 | Intensity: | 84.418 |
| Position:               | 1340.02 | Intensity: | 87.670 | Position:                       | 1339.80 | Intensity: | 85.634 |
| Position:               | 1379.50 | Intensity: | 78.989 | Position:                       | 1379.82 | Intensity: | 78.452 |
| Position:               | 1411.67 | Intensity: | 86.696 | Position:                       | 1417.64 | Intensity: | 84.025 |
| Position:               | 1456.52 | Intensity: | 86.916 | Position:                       | 1456.51 | Intensity: | 84.432 |
| Position:               | 1653.10 | Intensity: | 94.880 | Position:                       | 1507.16 | Intensity: | 92.228 |
| Position:               | 2163.14 | Intensity: | 98.731 | Position:                       | 1540.57 | Intensity: | 92.608 |
| Position:               | 2883.46 | Intensity: | 87.149 | Position:                       | 1652.89 | Intensity: | 88.386 |
| Position:               | 2928.88 | Intensity: | 88.146 | Position:                       | 2885.29 | Intensity: | 87.211 |
| Position:               | 2971.62 | Intensity: | 72.431 | Position:                       | 2928.35 | Intensity: | 86.845 |
| Position:               | 3336.30 | Intensity: | 77.255 | Position:                       | 2971.99 | Intensity: | 74.609 |
|                         |         |            |        | Position:                       | 3335.98 | Intensity: | 75.185 |
| <b>Turmeric extract</b> |         |            |        | <b>Ag-TiO<sub>2</sub> bmNPs</b> |         |            |        |

Fig. S3. The results of the FTIR analysis of turmeric extract and Ag-TiO<sub>2</sub> bmNPs.

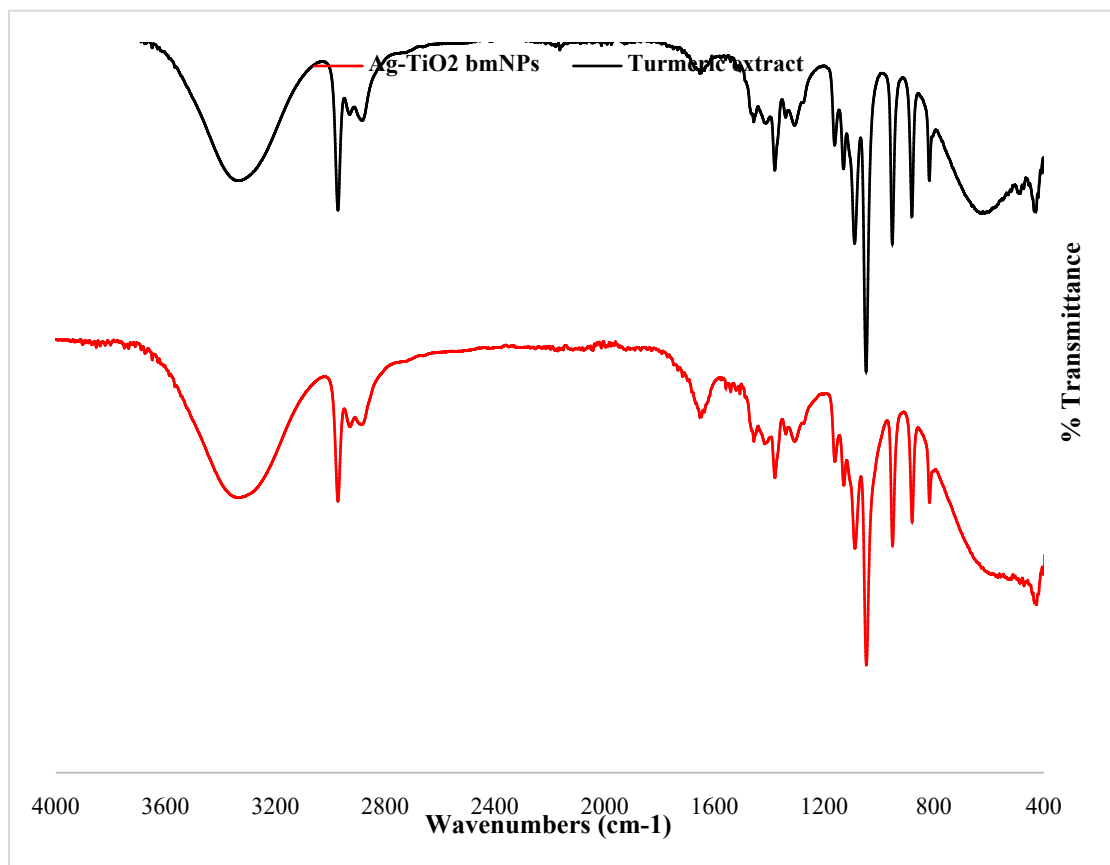

Fig. S4. FT-IR analysis of turmeric extract, and Ag-TiO<sub>2</sub> bmNPs.

**Table S3.** XRD analysis of the nanocatalyst.

| Pos. [ $^{\circ}2\theta$ .] | Height [cts] | FWHM [ $^{\circ}2\theta$ .] | d-spacing [ $\text{\AA}$ ] | Rel. Int. [%] | Tip width [ $^{\circ}2\theta$ .] | Matched by  |
|-----------------------------|--------------|-----------------------------|----------------------------|---------------|----------------------------------|-------------|
| 25.4282                     | 294.02       | 0.1771                      | 3.50289                    | 100.00        | 0.2125                           | 01-073-1764 |
| 27.9393                     | 51.89        | 0.2362                      | 3.19350                    | 17.65         | 0.2834                           | 00-006-0480 |
| 32.3090                     | 81.99        | 0.3542                      | 2.77088                    | 27.89         | 0.4251                           | 00-006-0480 |
| 37.8764                     | 72.28        | 0.1771                      | 2.37542                    | 24.58         | 0.2125                           | 01-073-1764 |
| 46.2968                     | 45.27        | 0.4133                      | 1.96110                    | 15.40         | 0.4959                           | 00-006-0480 |
| 48.1503                     | 75.29        | 0.1771                      | 1.88985                    | 25.61         | 0.2125                           | 01-073-1764 |
| 54.0300                     | 46.50        | 0.2362                      | 1.69726                    | 15.82         | 0.2834                           | 01-073-1764 |
| 55.1796                     | 50.89        | 0.2362                      | 1.66459                    | 17.31         | 0.2834                           | 01-073-1764 |
| 57.5827                     | 12.51        | 0.4723                      | 1.60071                    | 4.25          | 0.5668                           | 00-006-0480 |
| 62.7931                     | 28.94        | 0.3542                      | 1.47984                    | 9.84          | 0.4251                           | 01-073-1764 |
| 68.8952                     | 10.12        | 0.3542                      | 1.36292                    | 3.44          | 0.4251                           | 01-073-1764 |
| 70.3194                     | 10.57        | 0.3542                      | 1.33876                    | 3.59          | 0.4251                           | 01-073-1764 |
| 75.1116                     | 25.78        | 0.1771                      | 1.26480                    | 8.77          | 0.2125                           | 01-073-1764 |
| 82.9333                     | 6.21         | 0.8640                      | 1.16327                    | 2.11          | 1.0368                           | 01-073-1764 |

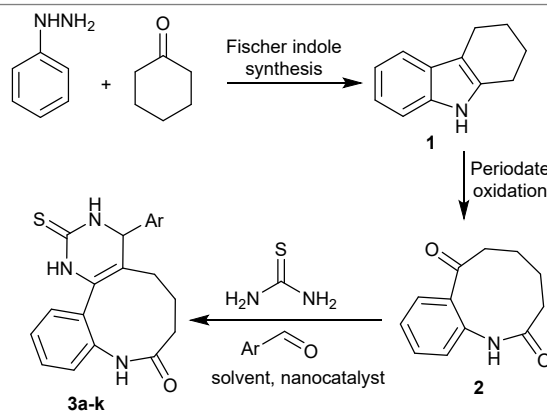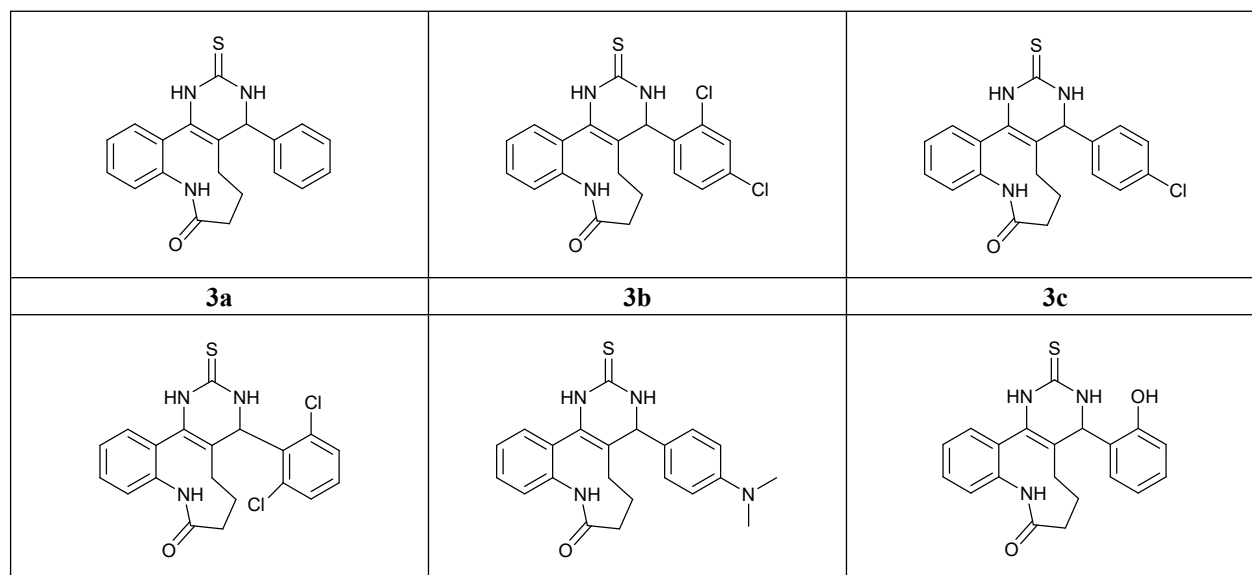

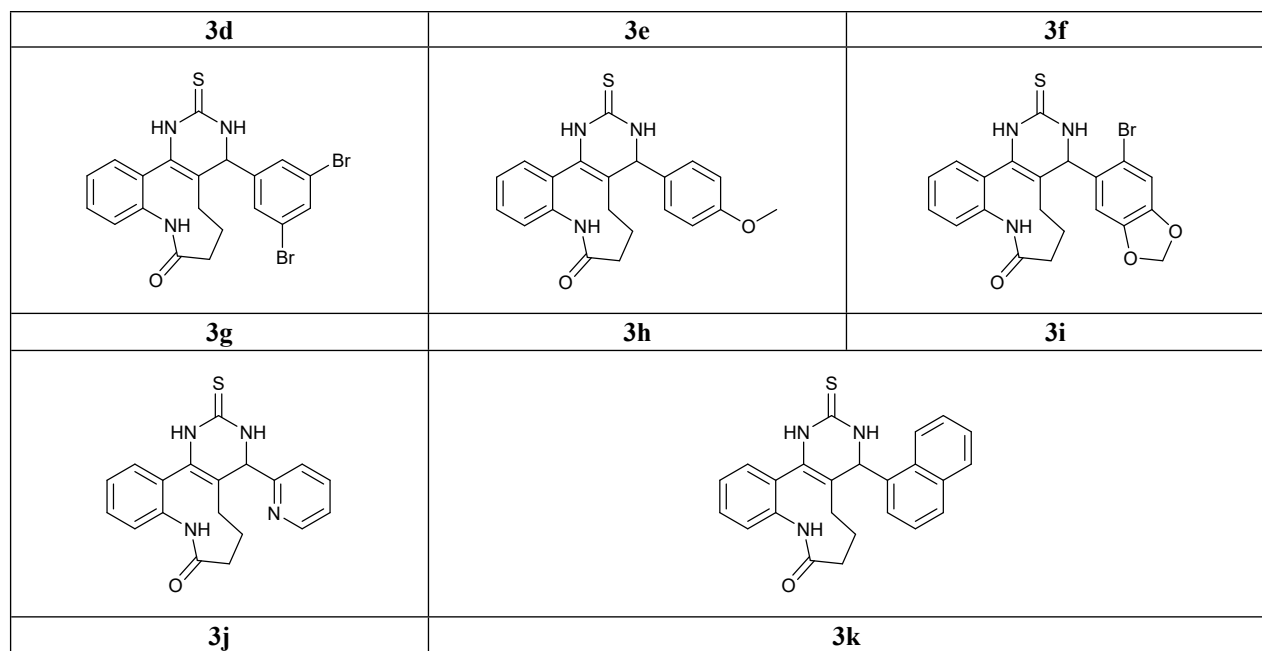

**Fig. S5.** Synthesis of 4-(aryl)-2-thioxo-1,2,3,4,5,6,7,9-octahydro-8*H*-benzo[*b*]pyrimido[4,5-*d*]azonin-8-one derivatives.

### Spectral Charts

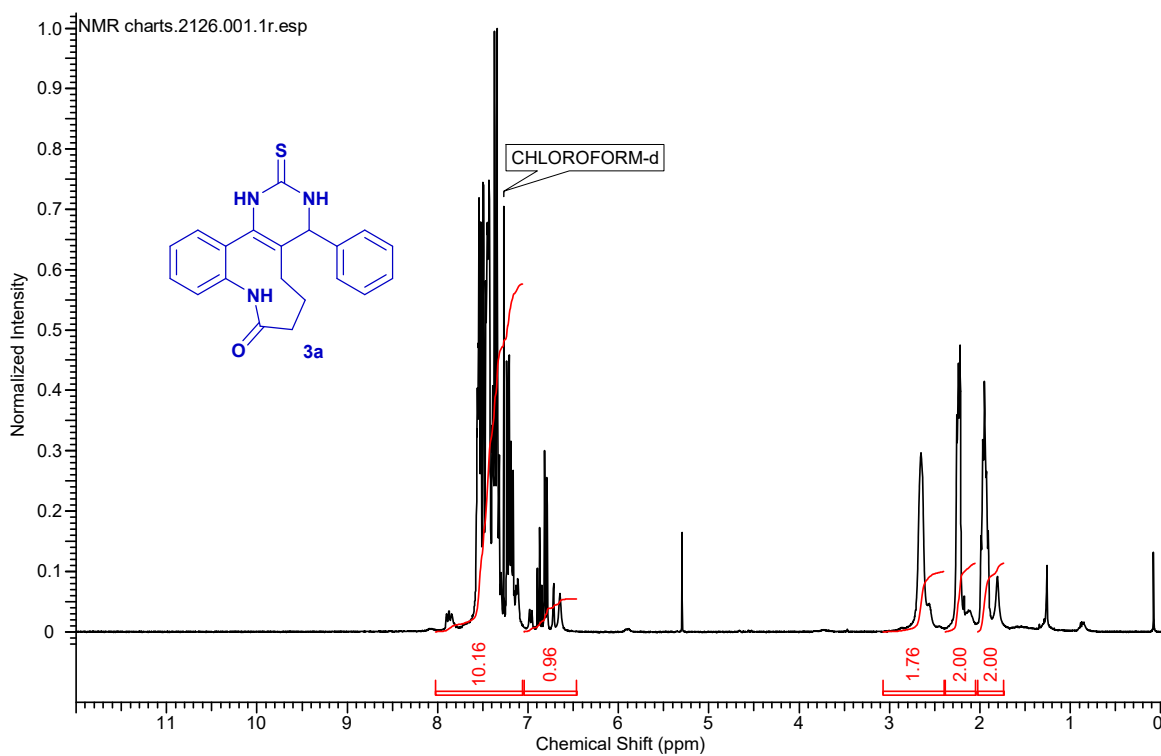



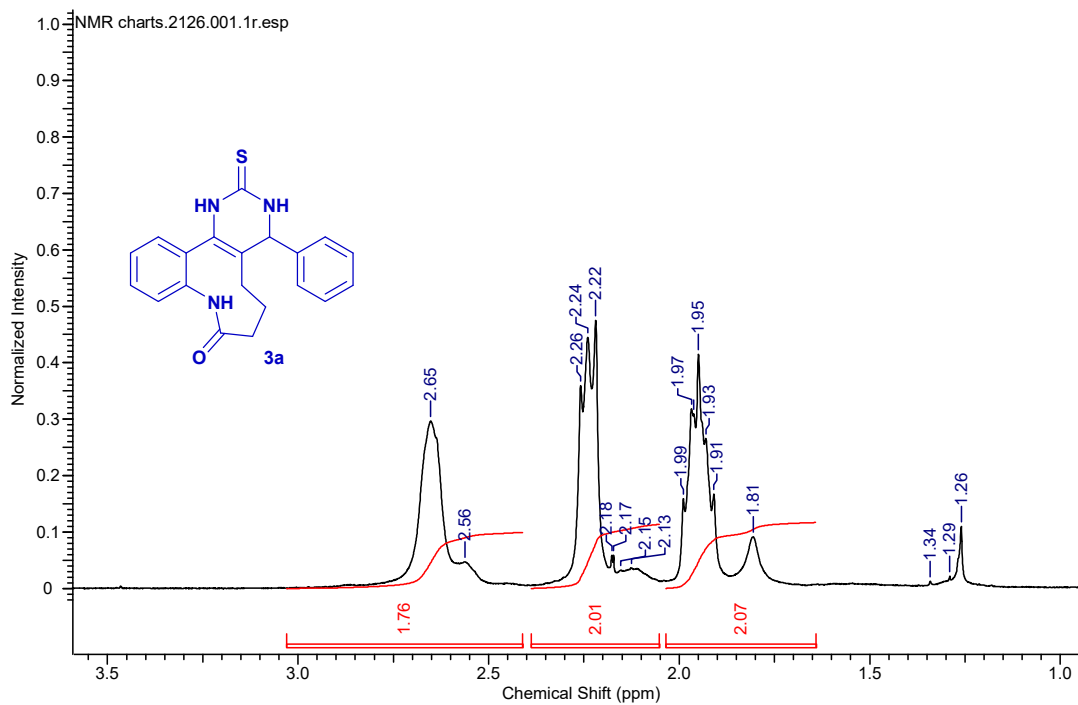

Fig. S6. <sup>1</sup>H-NMR spectrum of compound 3a.

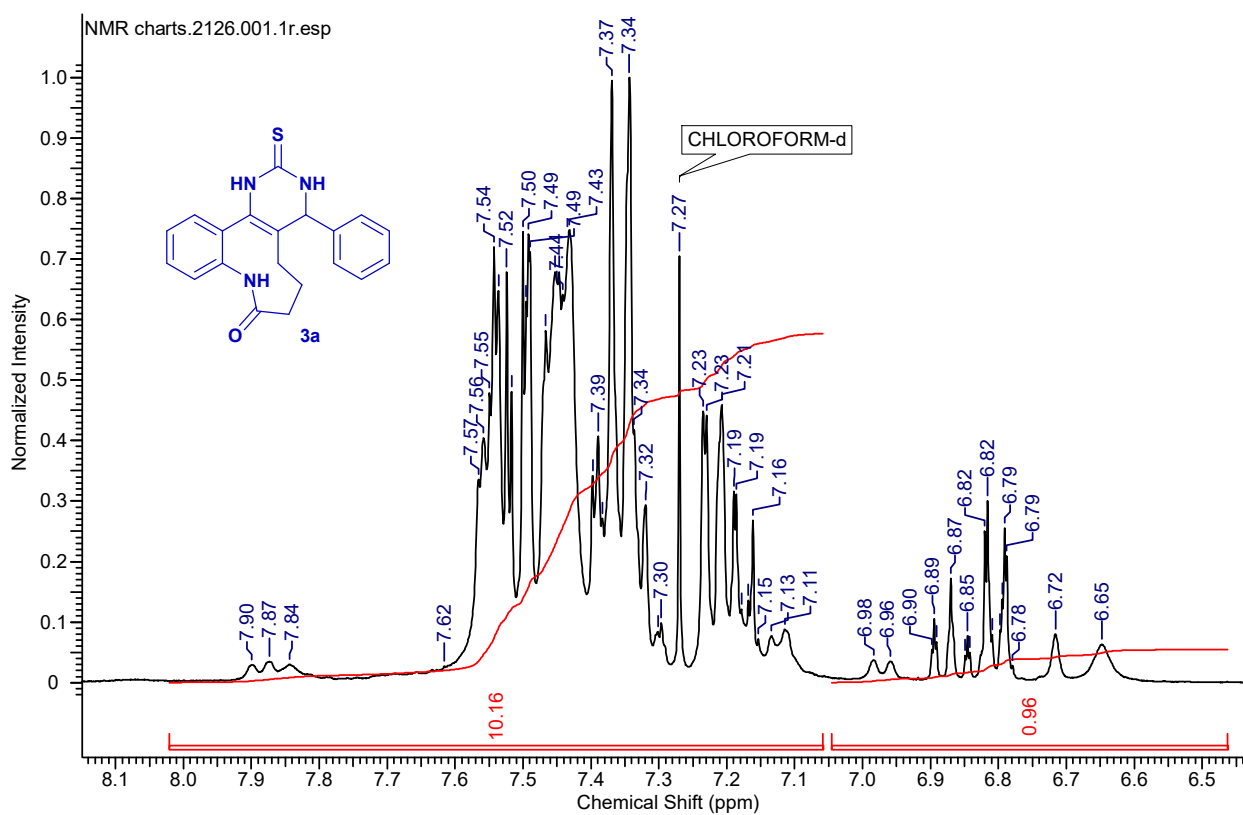

Fig. S6. <sup>1</sup>H-NMR spectrum of compound 3a.

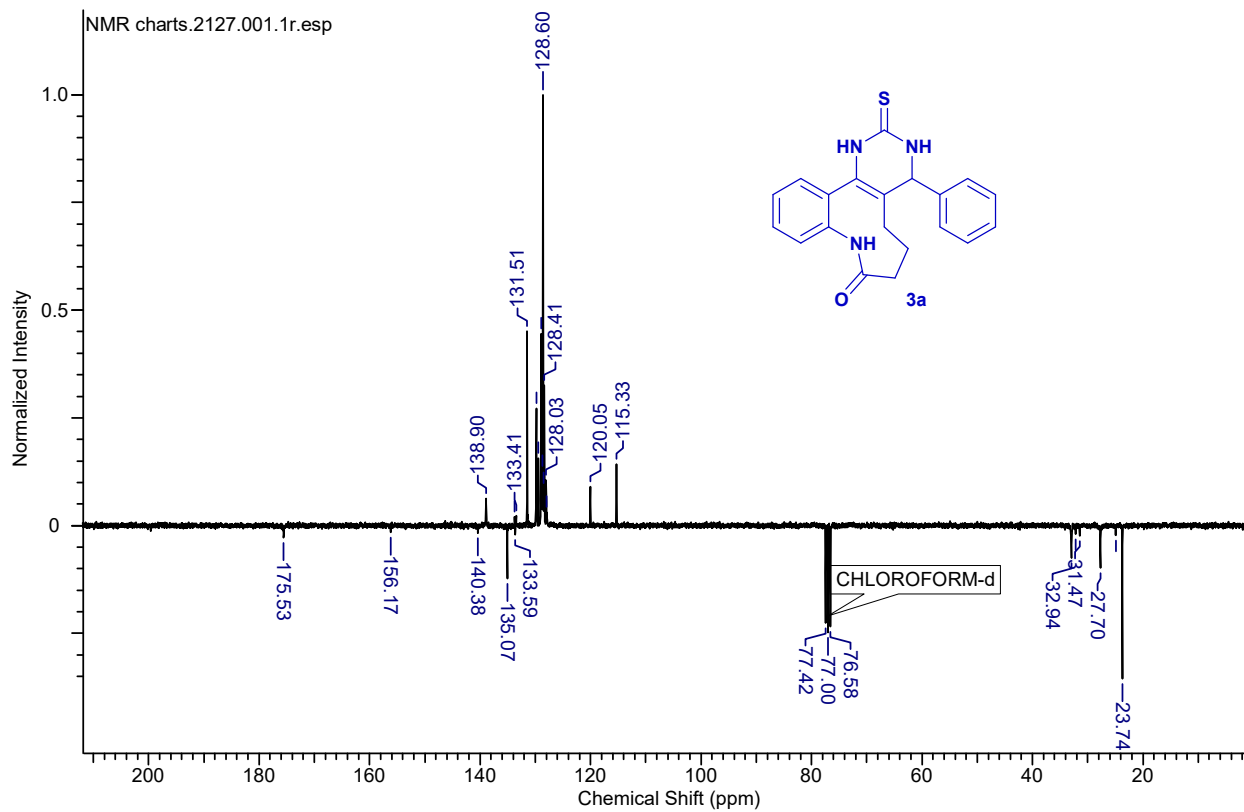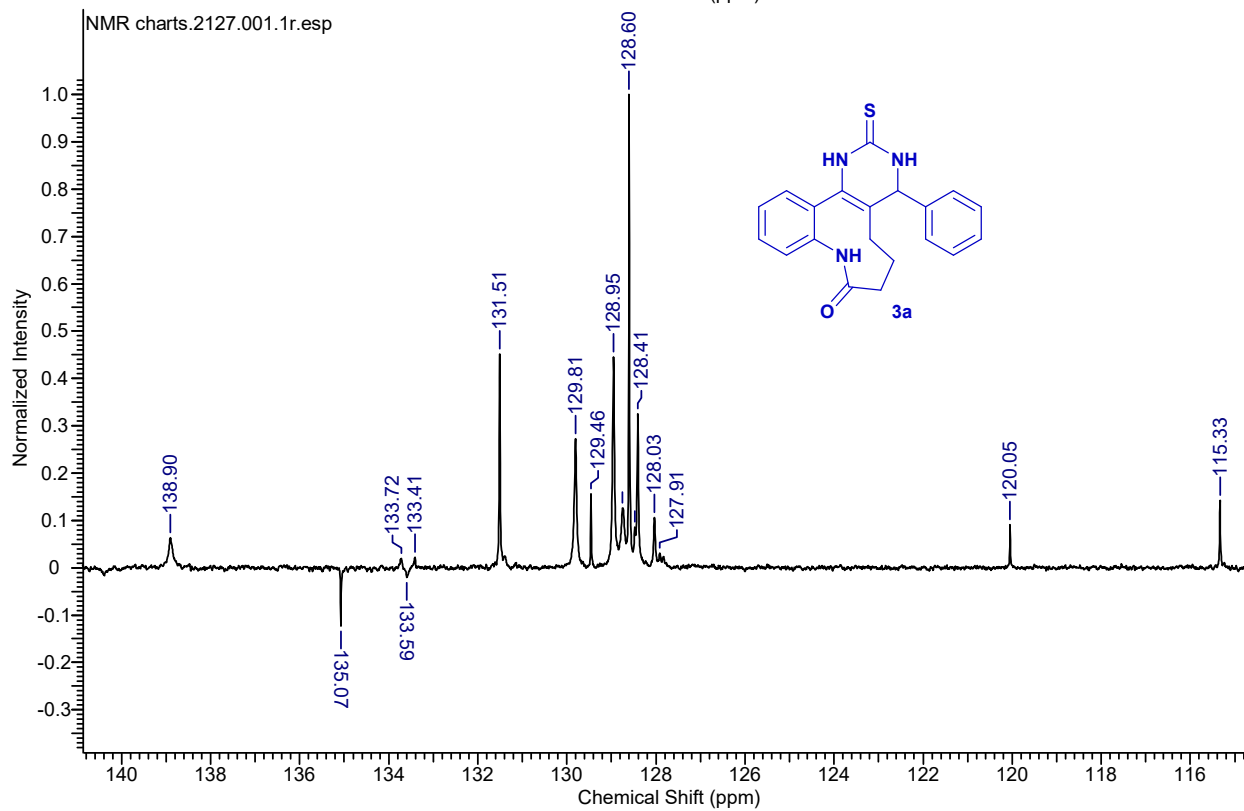

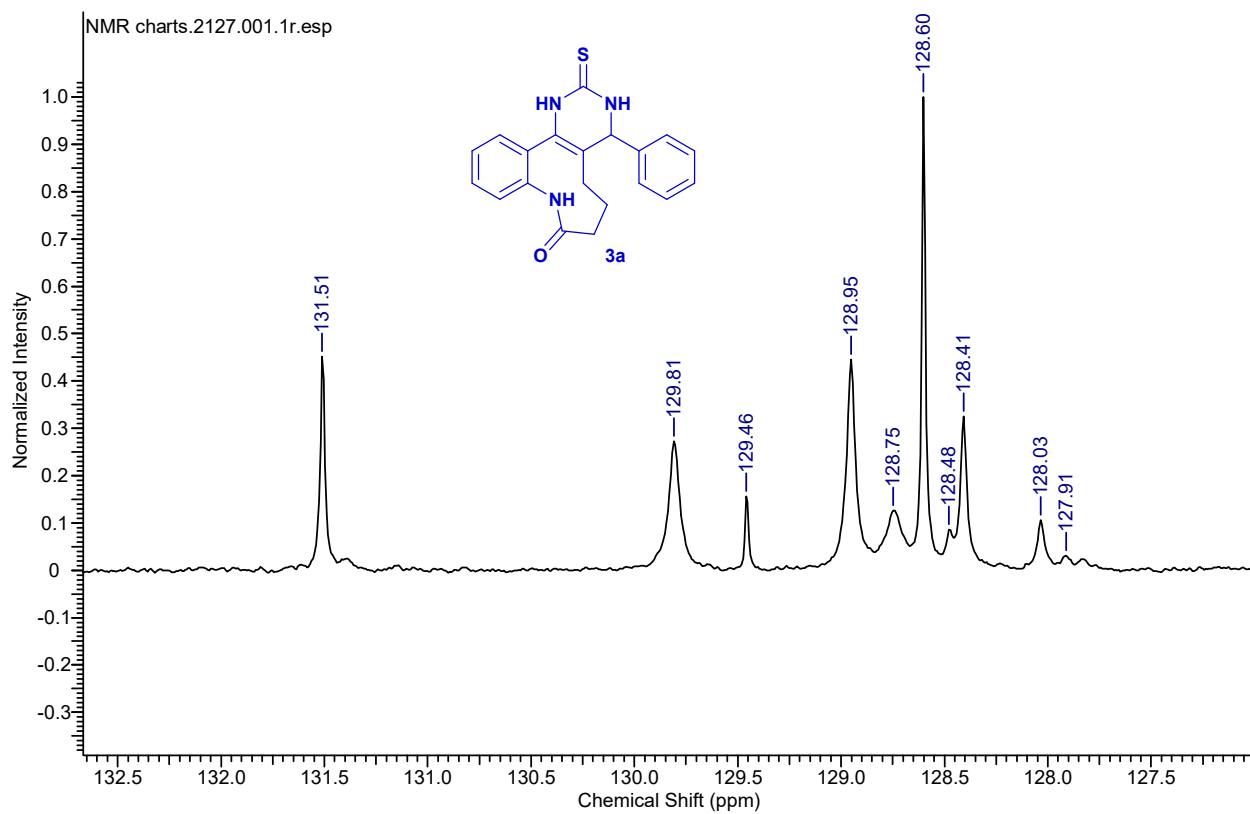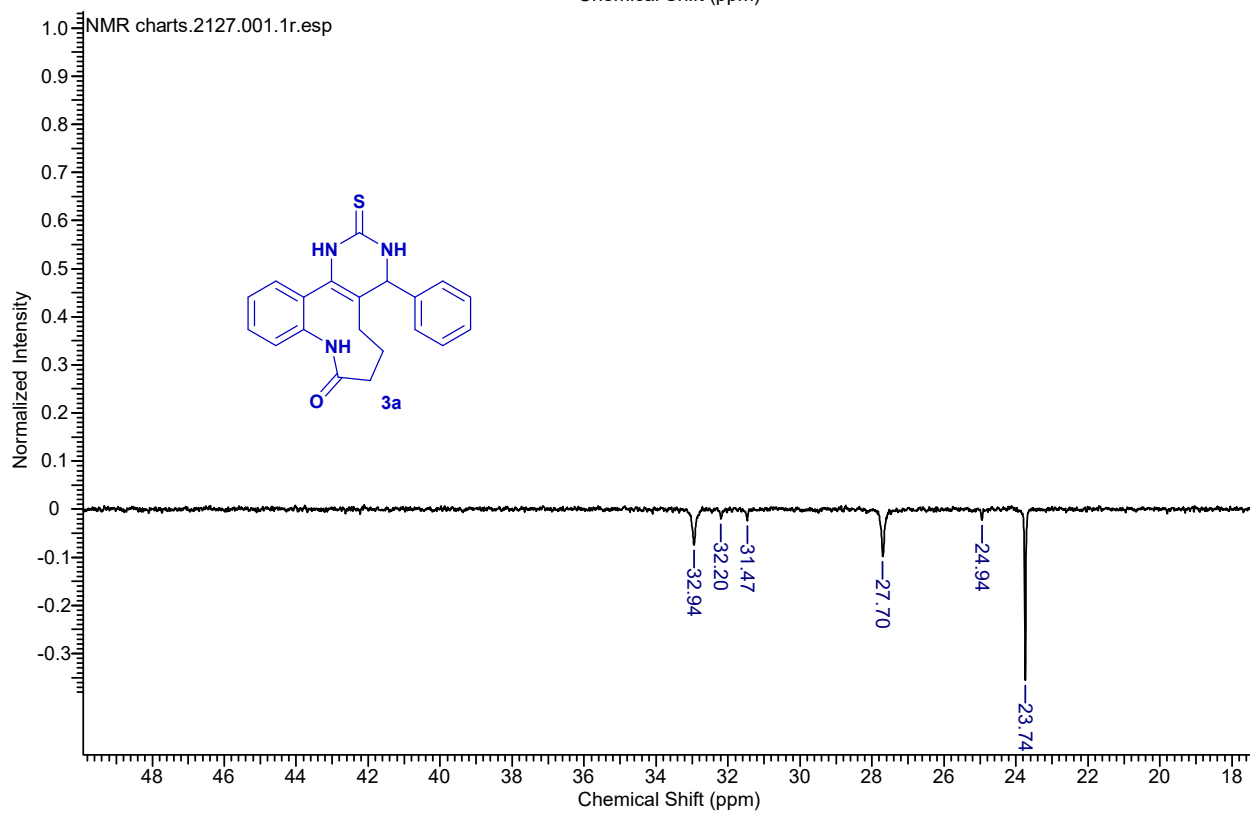

**Fig. S7.**  $^{13}\text{C}$ -NMR spectrum of compound **3a**.

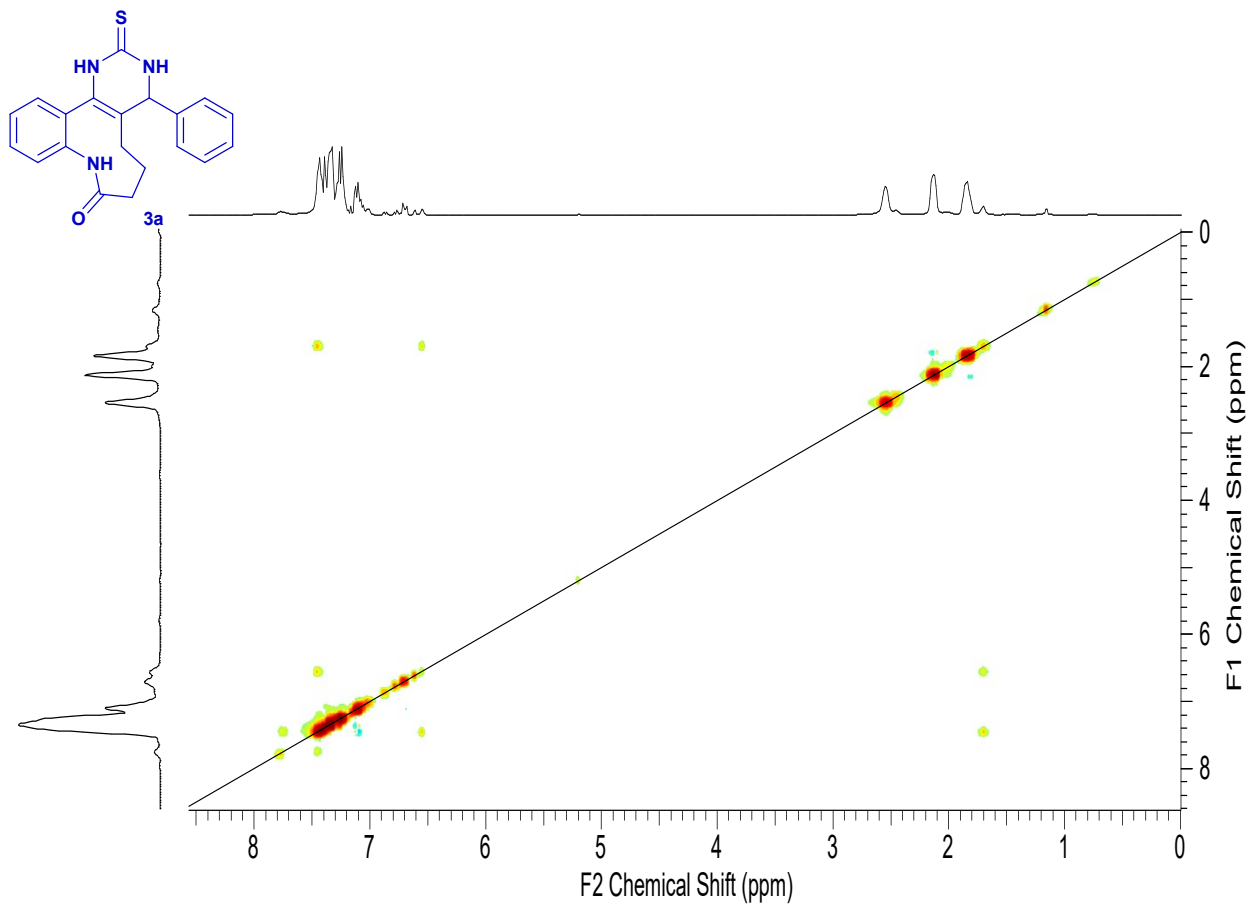

**Fig. S8.** 2D-NMR spectrum (COSY) of compound **3a**.

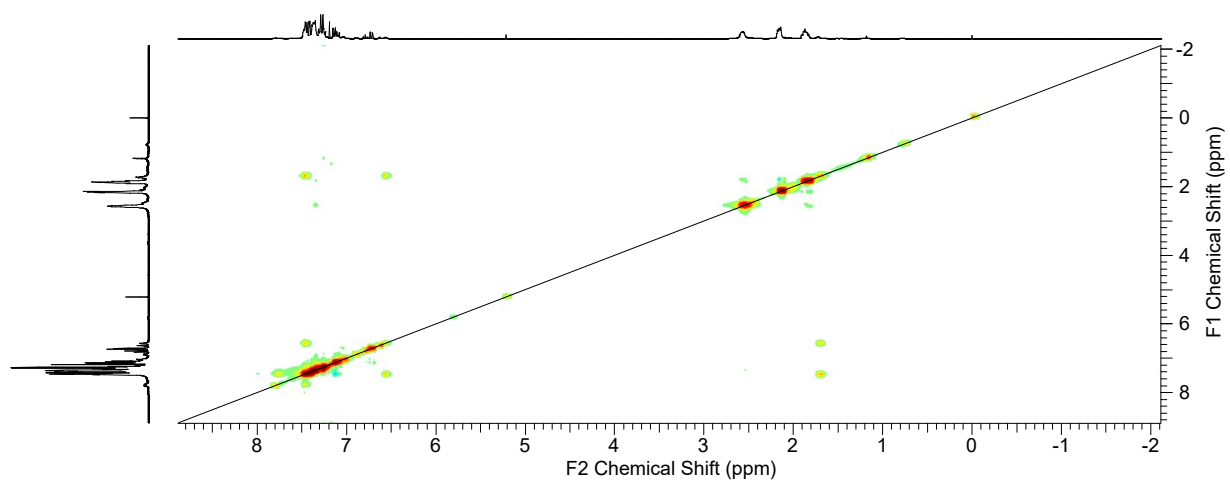

**Fig. S9.** 2D-NMR spectrum (NOESY) of compound **3a**.

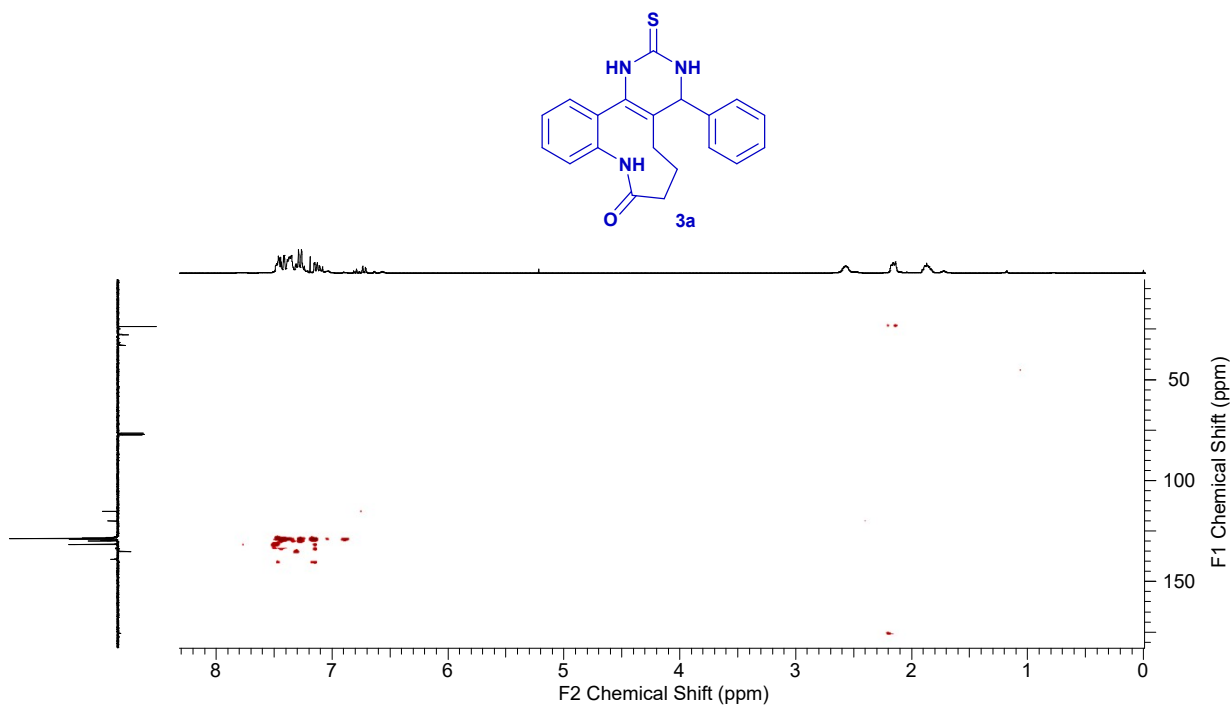

Fig. S10. 2D-NMR spectrum (HMBC) of compound 3a.

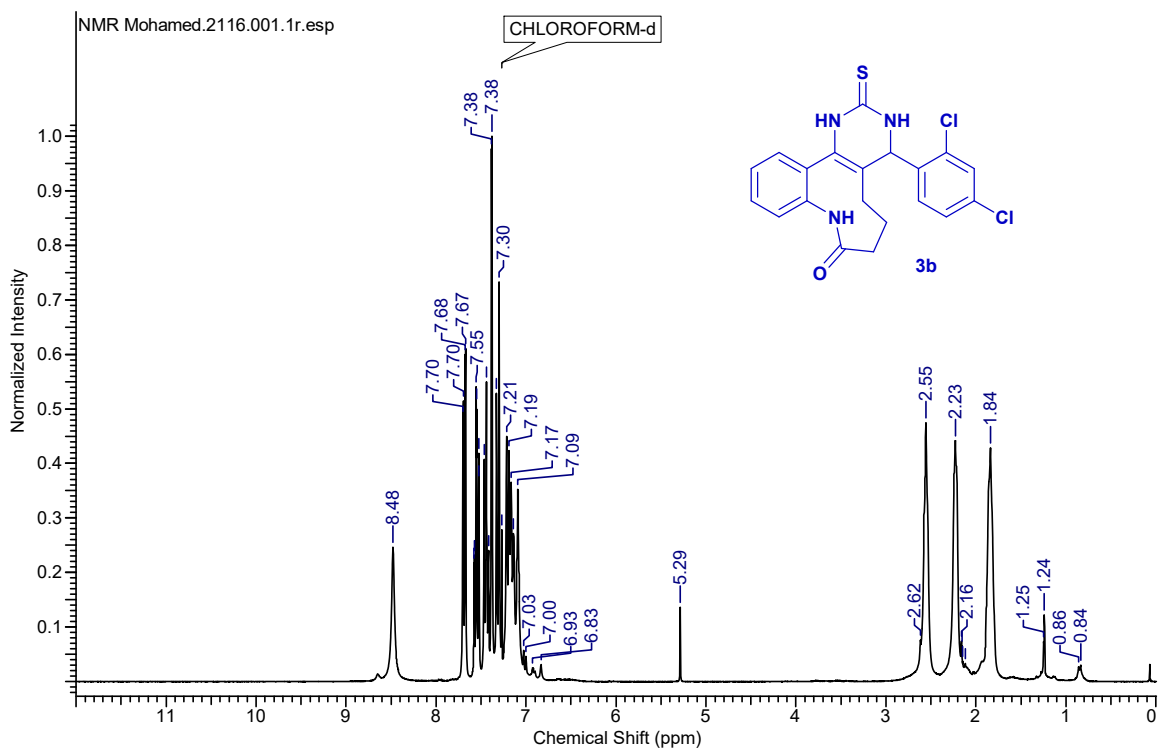

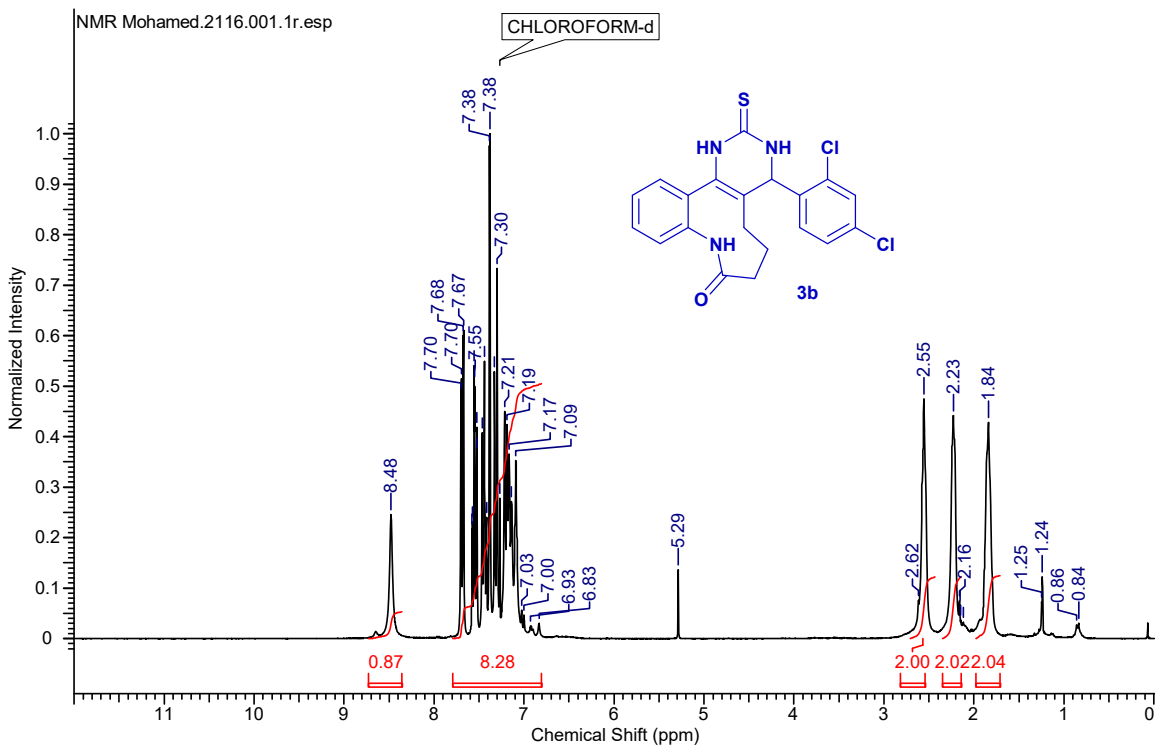

Fig. S11. <sup>1</sup>H-NMR spectrum of compound 3b.

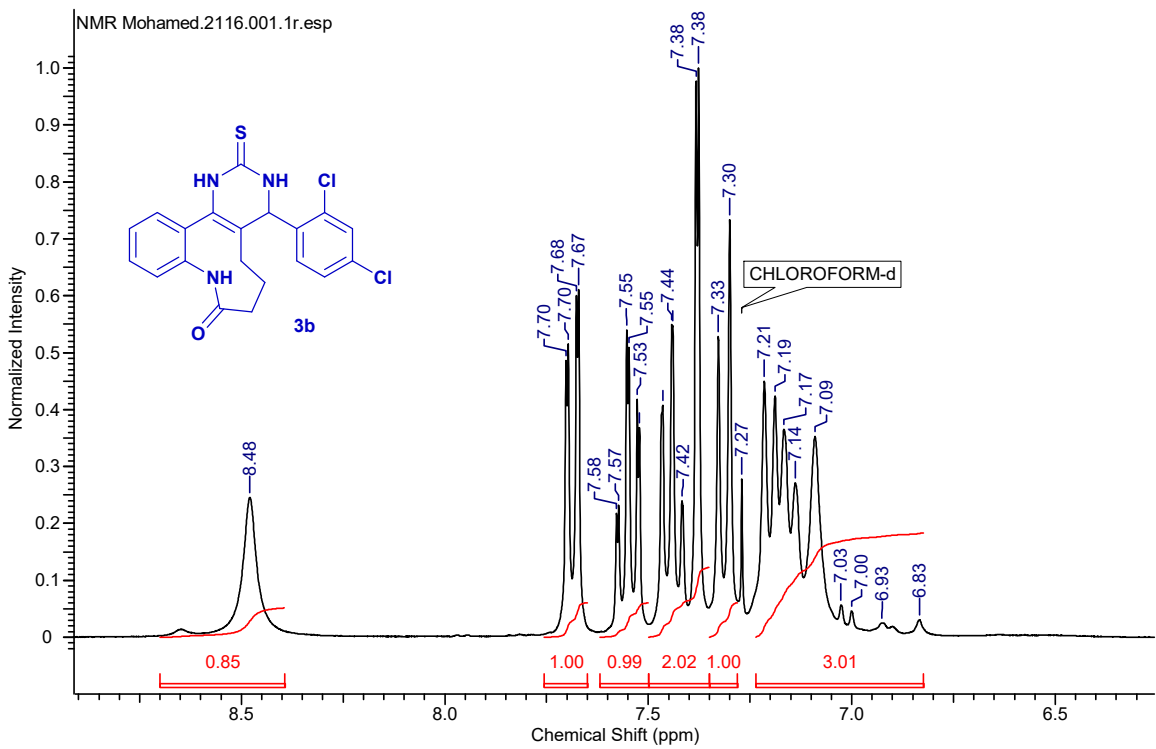

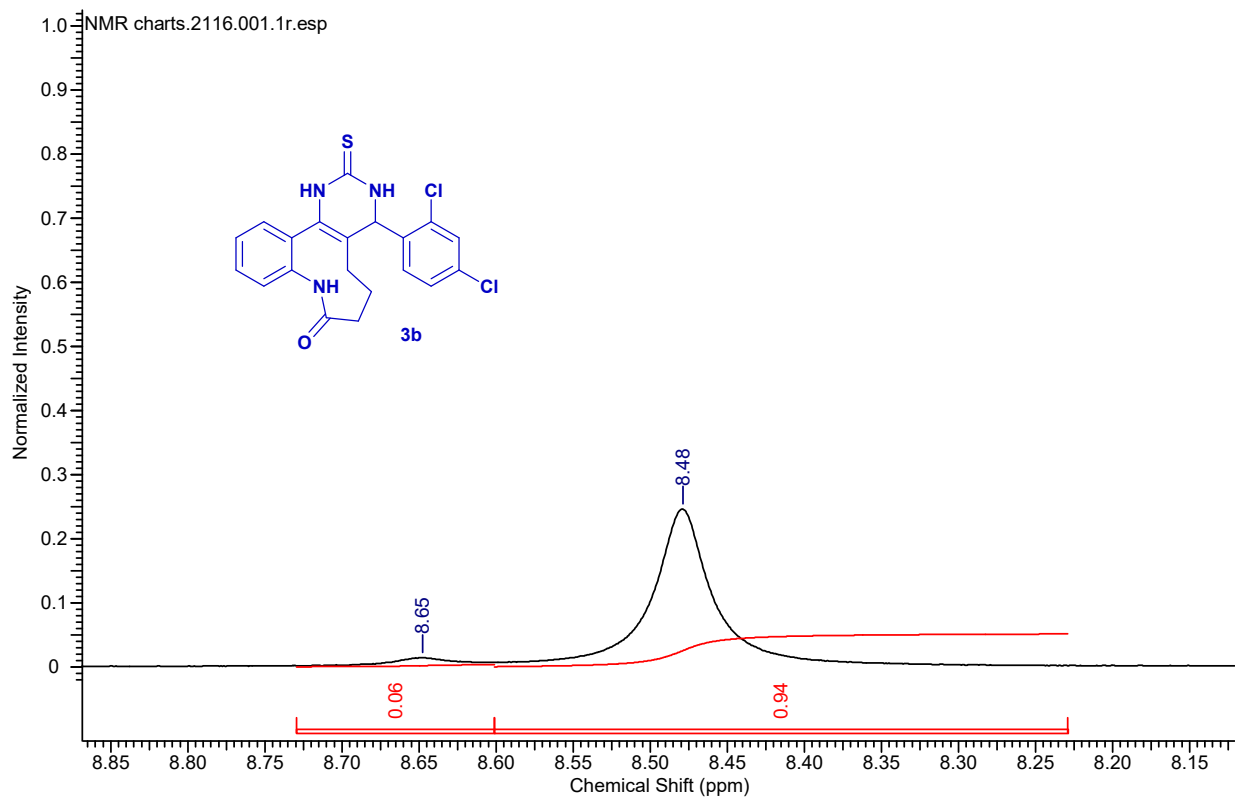

Fig. S11. <sup>1</sup>H-NMR spectrum of compound **3b**.

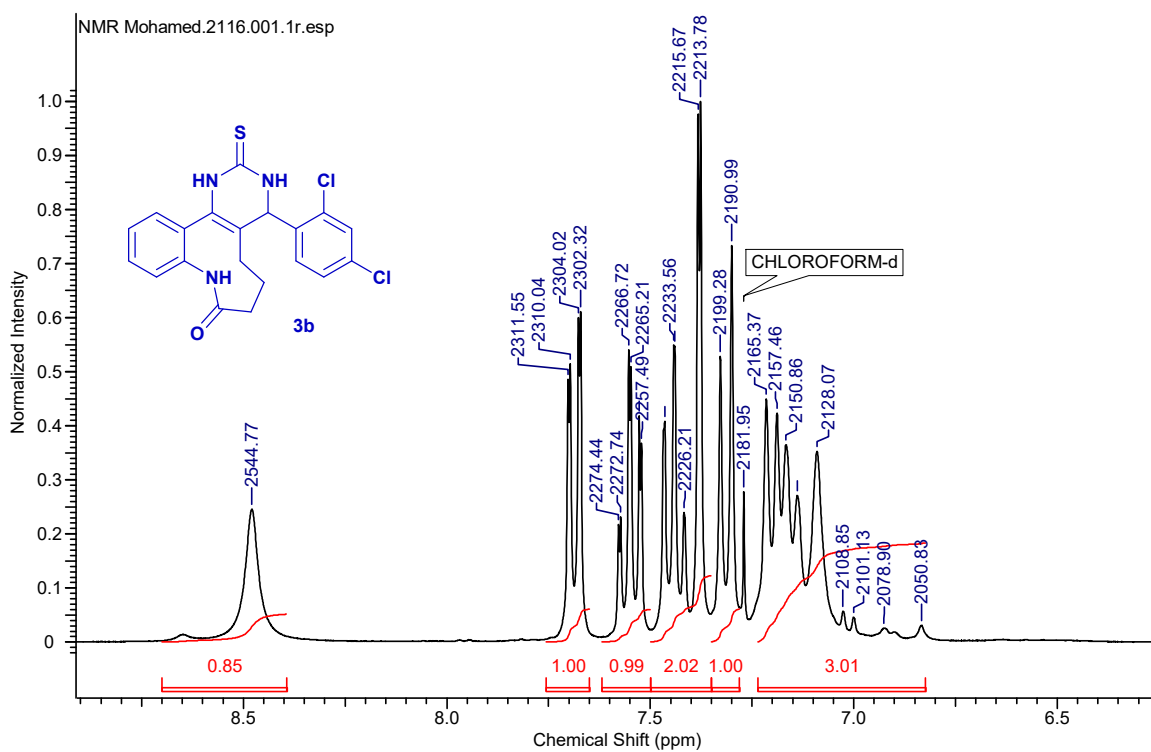

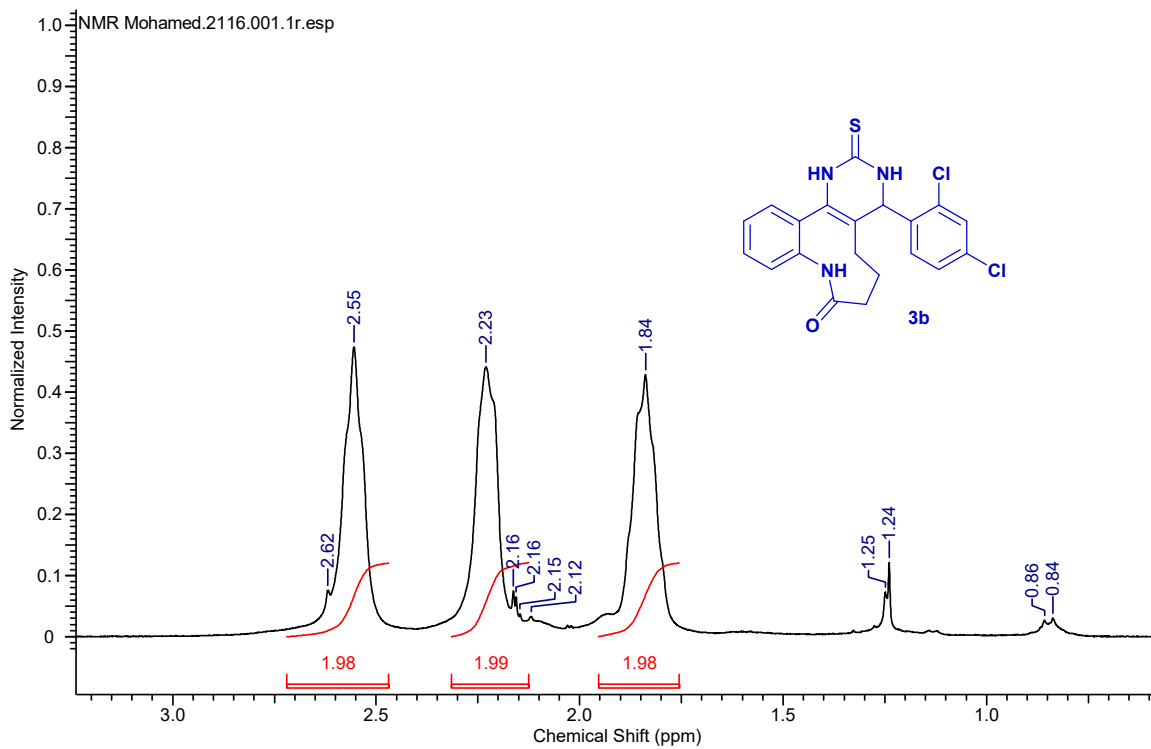

Fig. S11.  $^1\text{H-NMR}$  spectrum of compound **3b**.

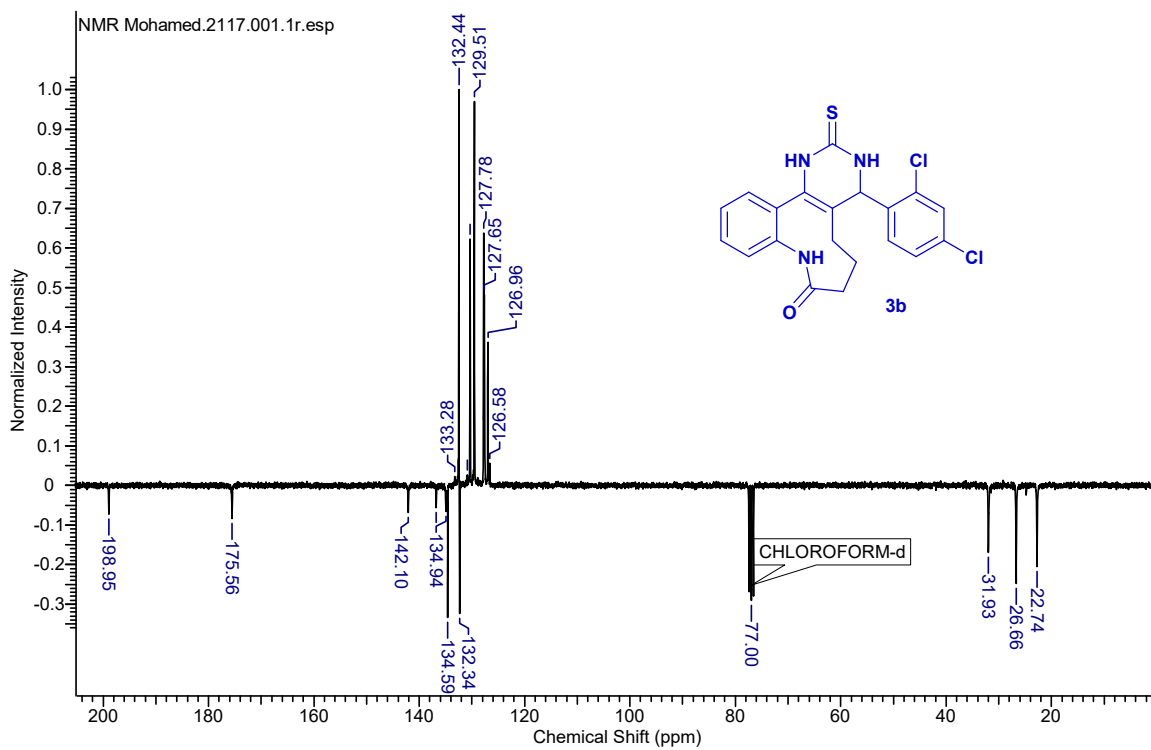



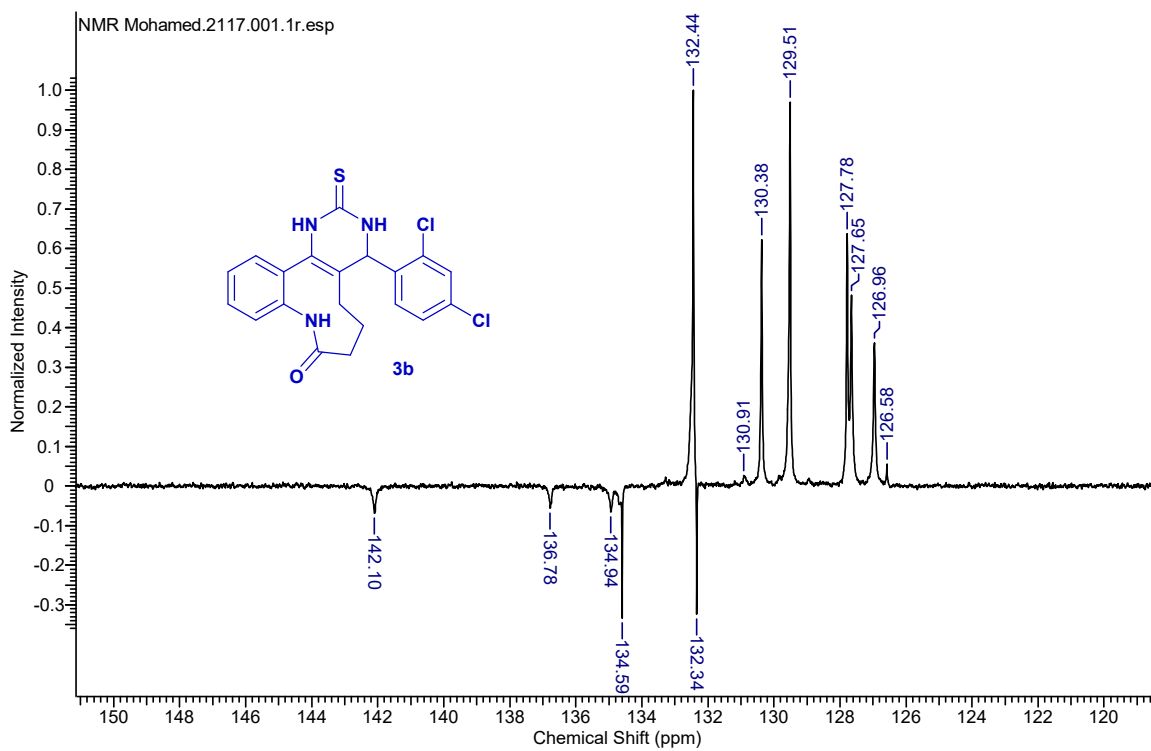

**Fig. S12.**  $^{13}\text{C}$ -NMR spectrum of compound **3b**.

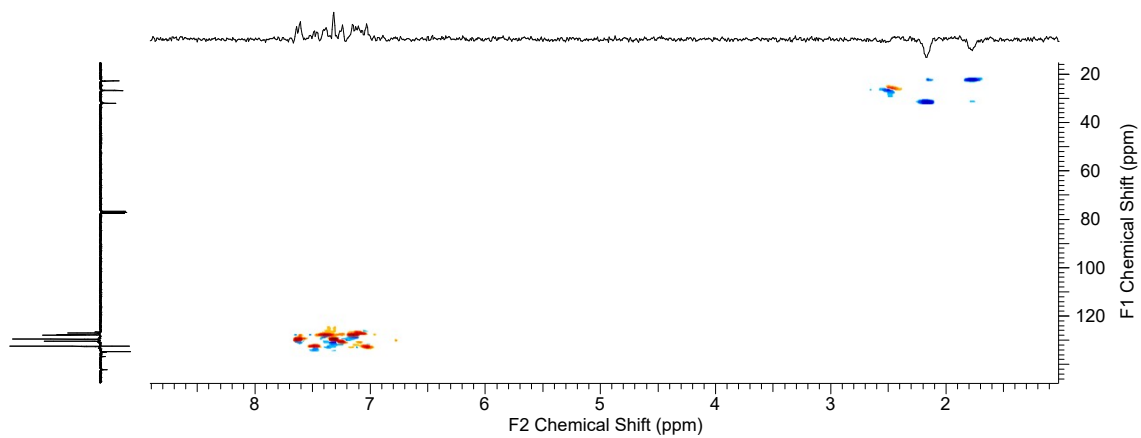

**Fig. S13.** 2D-NMR spectrum (HSQC) of compound **3b**.

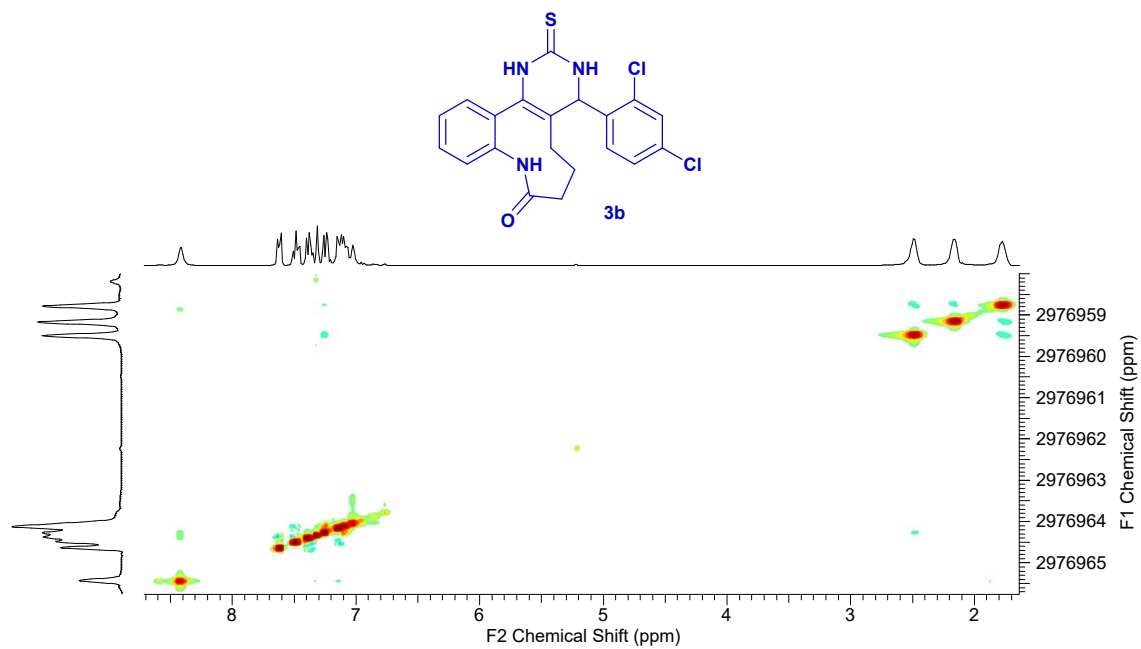

**Fig. S14.** 2D-NMR spectrum (COSY) of compound **3b**.

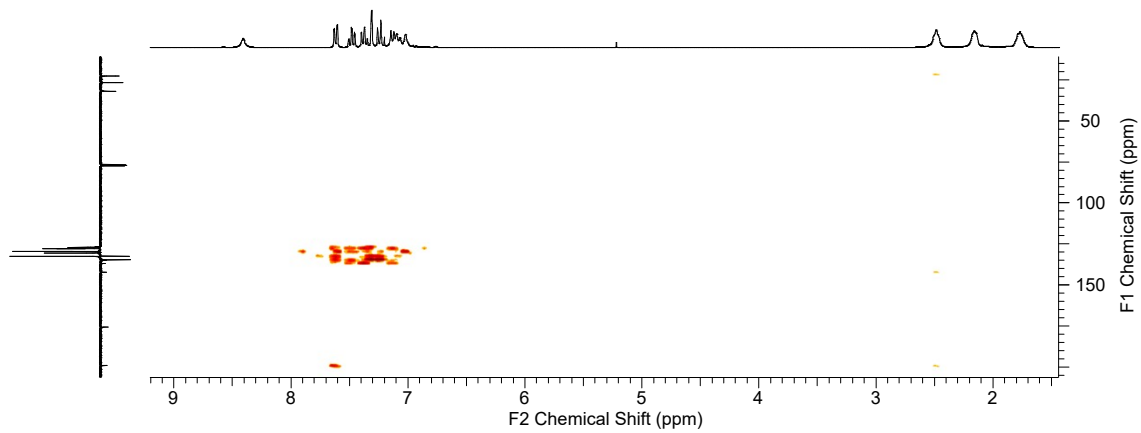

**Fig. S15.** 2D-NMR spectrum (HMBC) of compound **3b**.

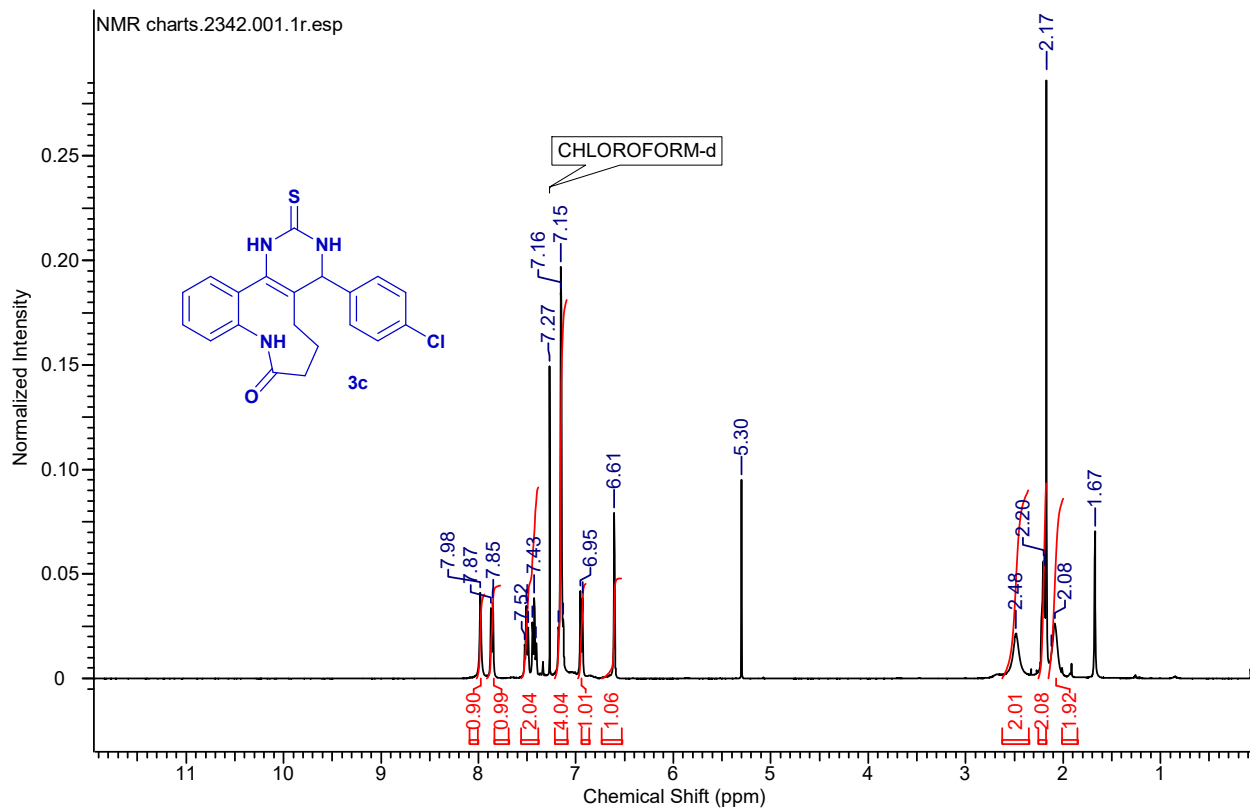

Fig. S16.  $^1\text{H}$ -NMR spectrum of compound 3c.

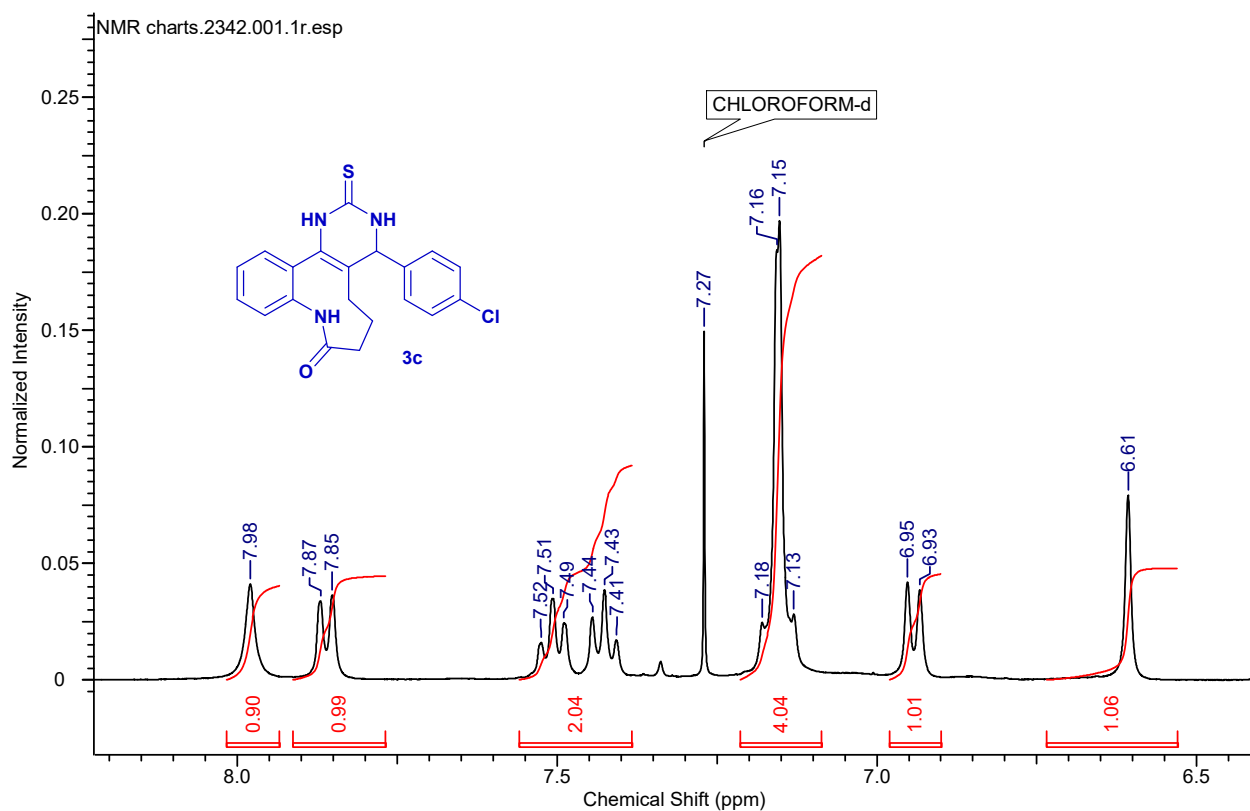

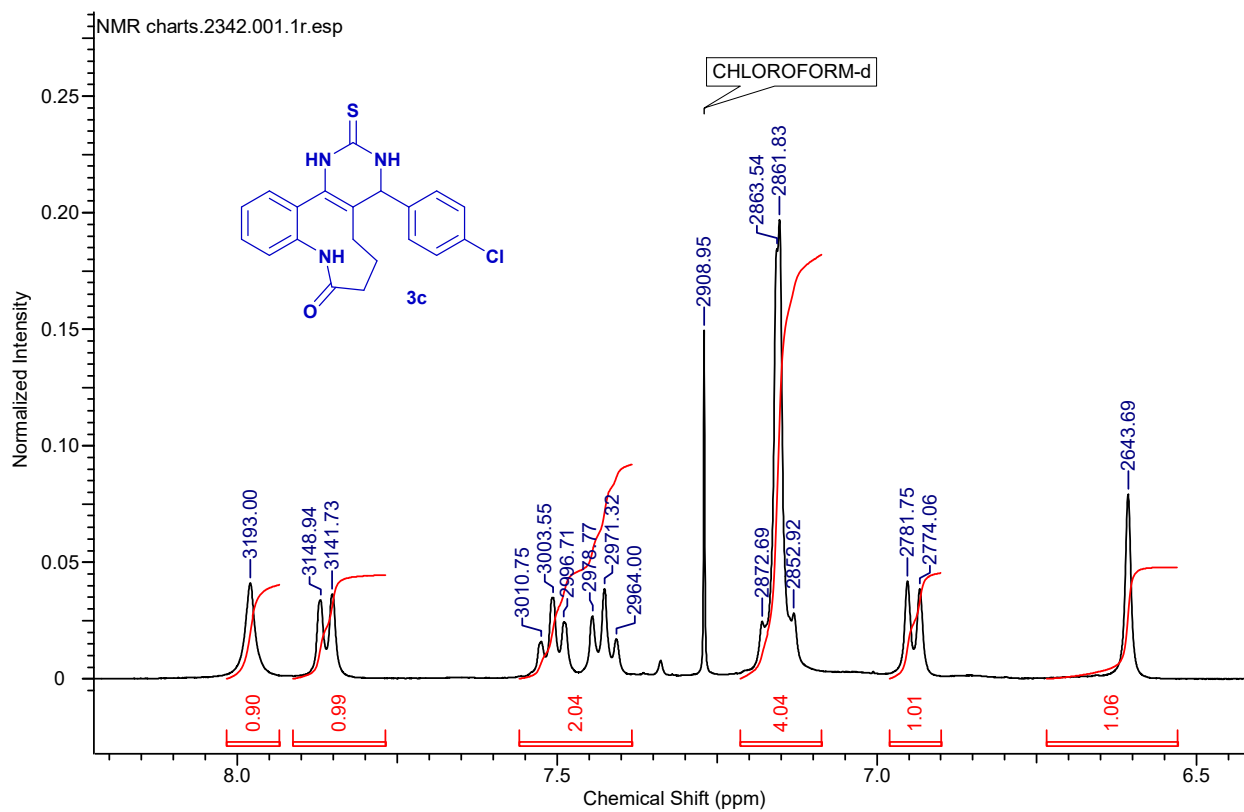

Fig. S16-A. <sup>1</sup>H-NMR spectrum of compound **3c**.

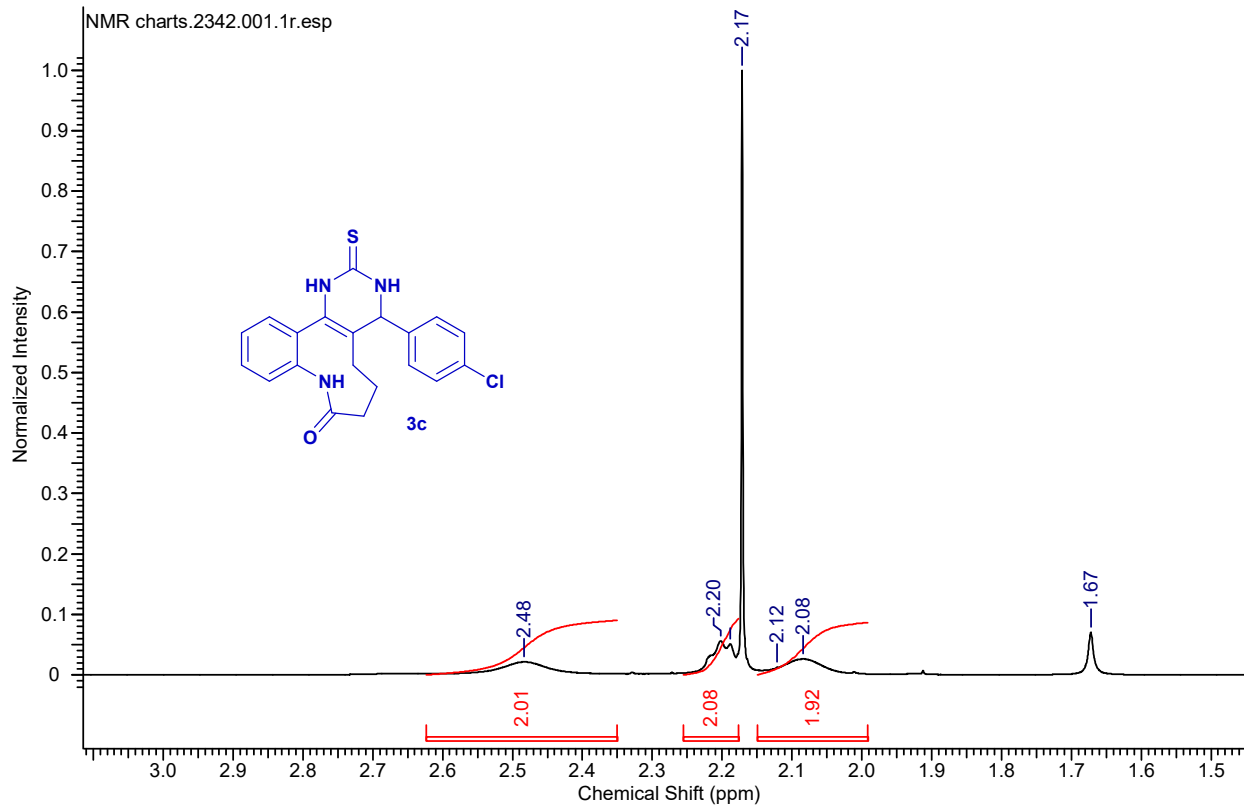

Fig. S16-B. <sup>1</sup>H-NMR spectrum of compound **3c**.

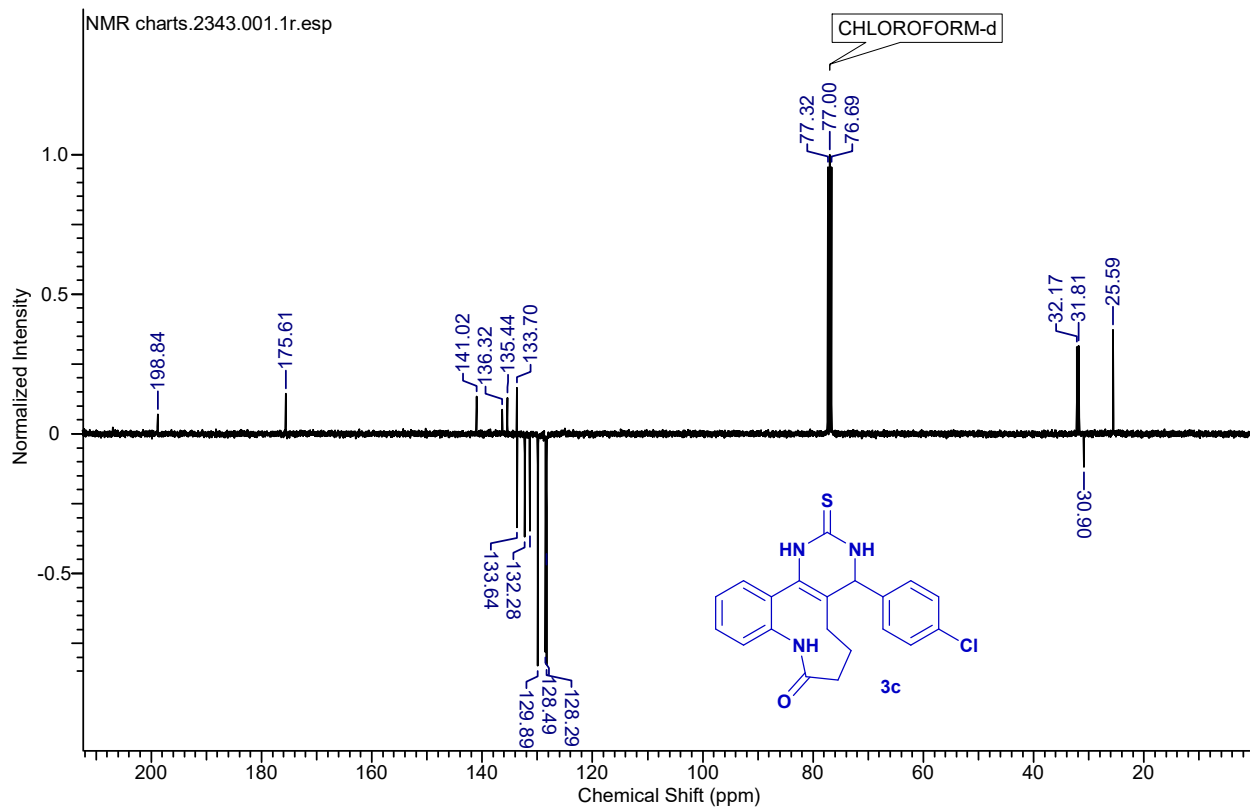

Fig. S17.  $^{13}\text{C}$ -NMR spectrum of compound **3c**.

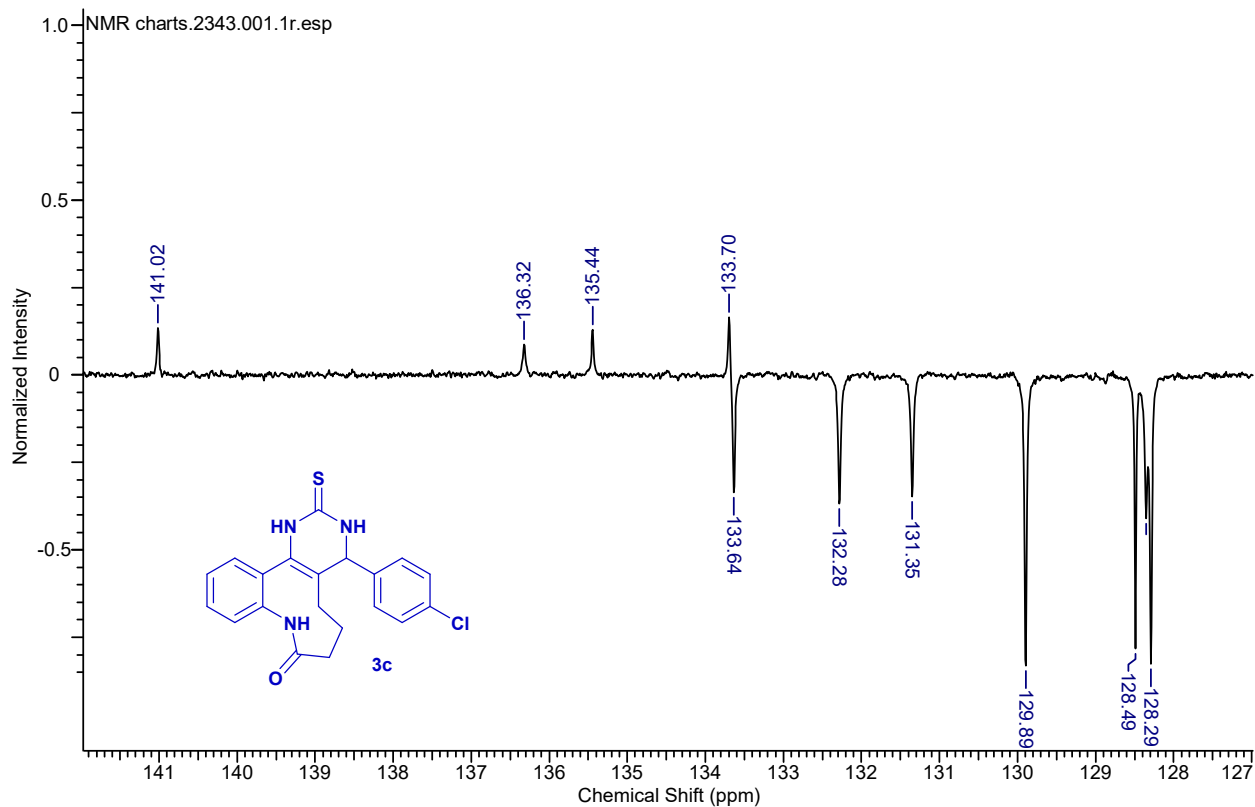

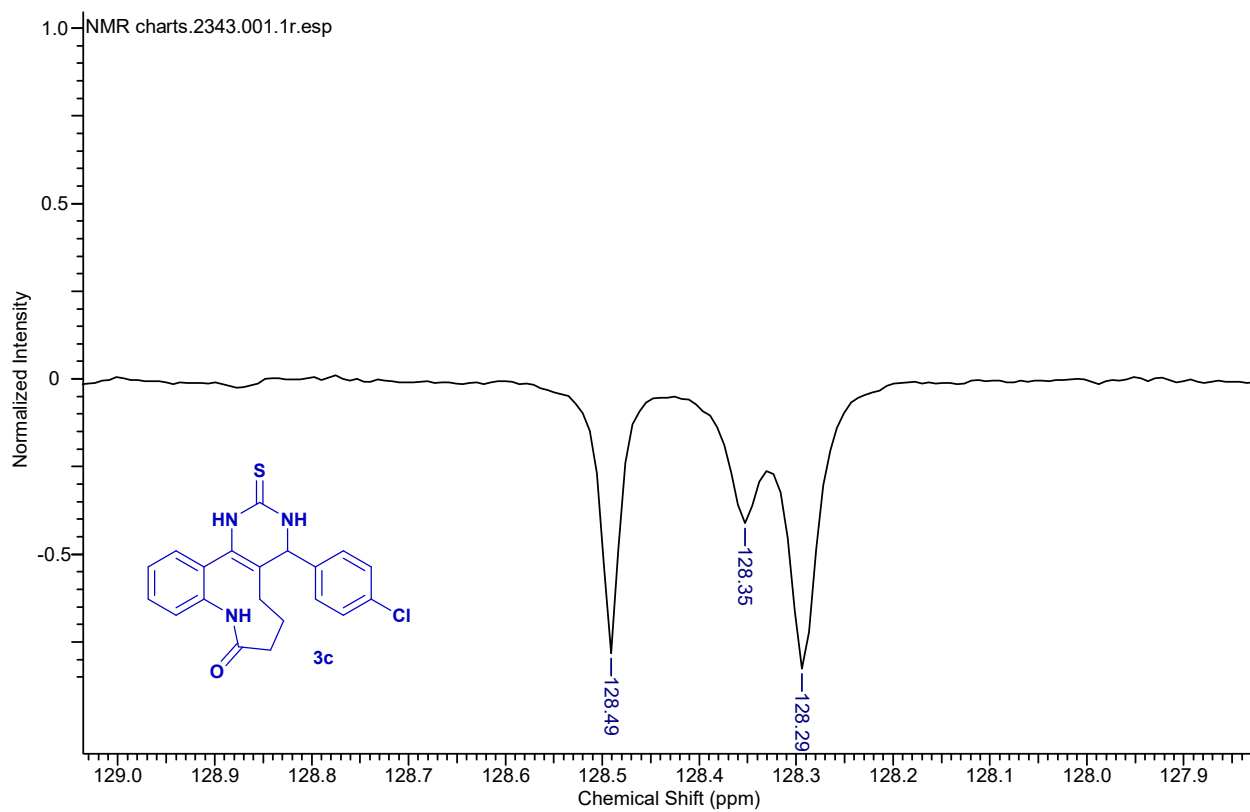

Fig. S17-A.  $^{13}\text{C}$ -NMR spectrum of compound **3c**.

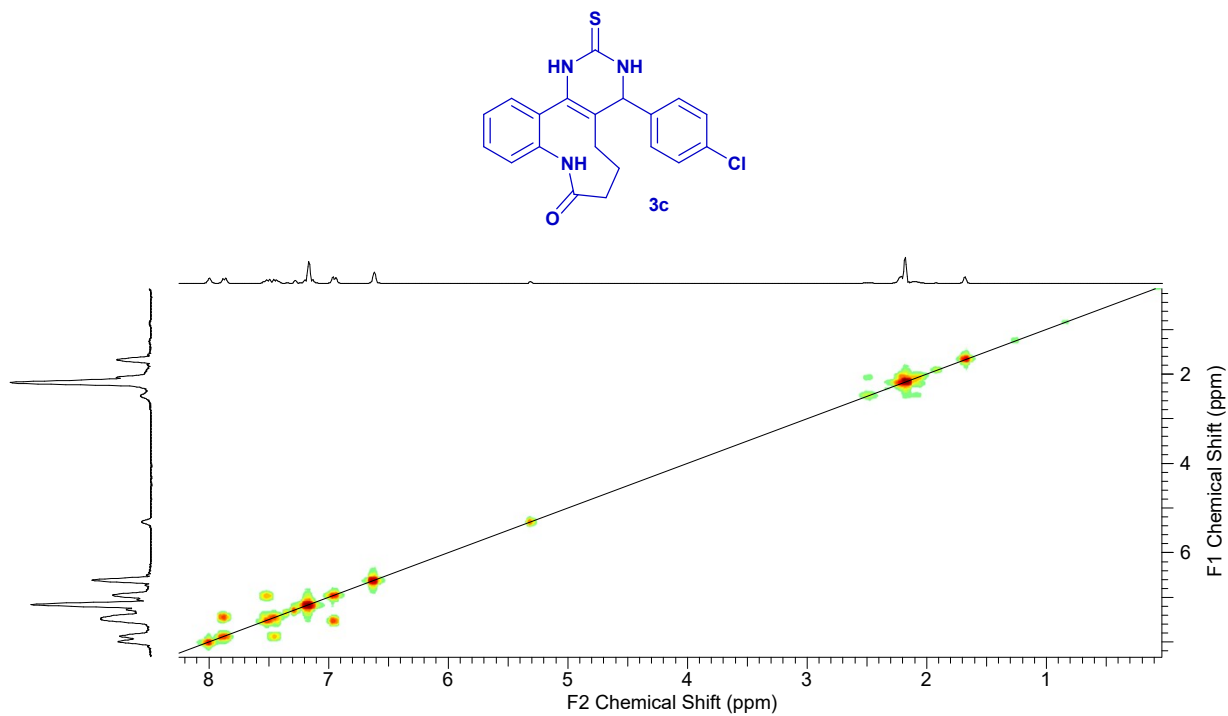

Fig. S18. 2D-NMR spectrum (COSY) of compound **3c**.

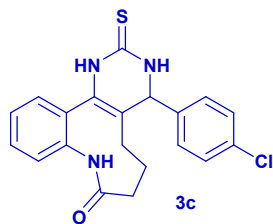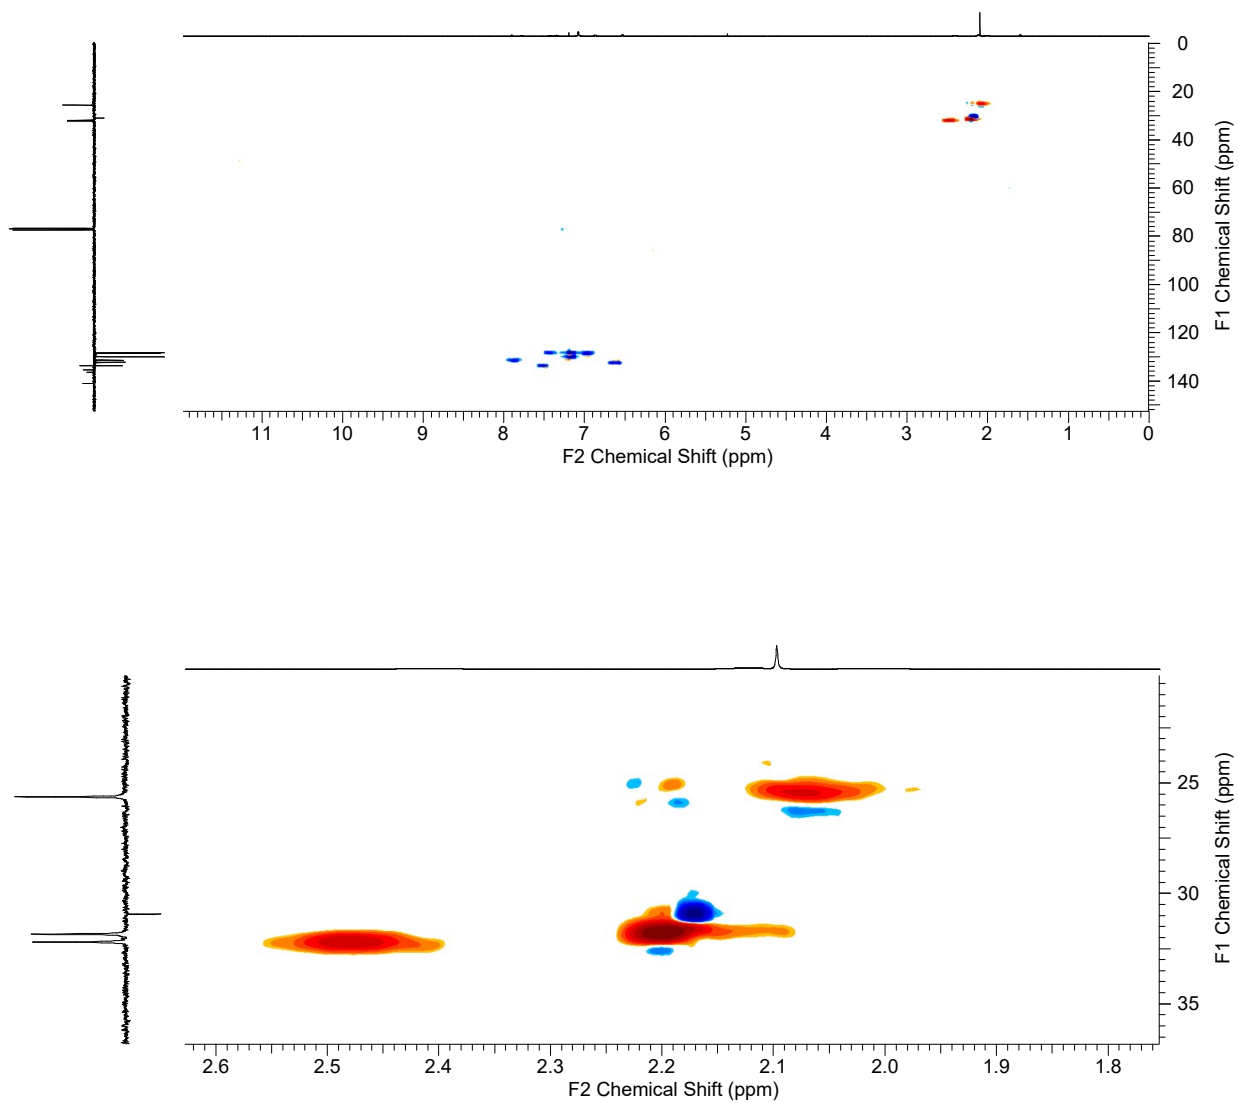

Fig. S19. 2D-NMR spectrum (HSQC) of compound 3c.

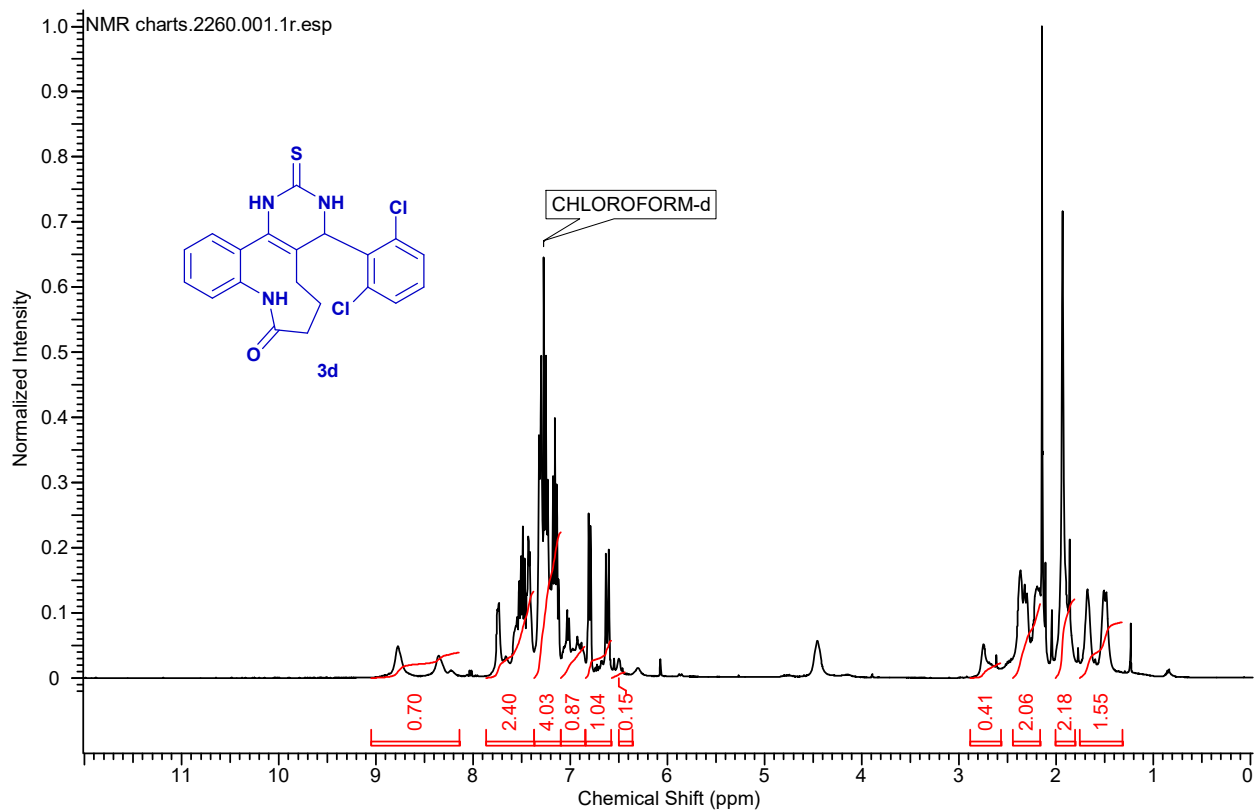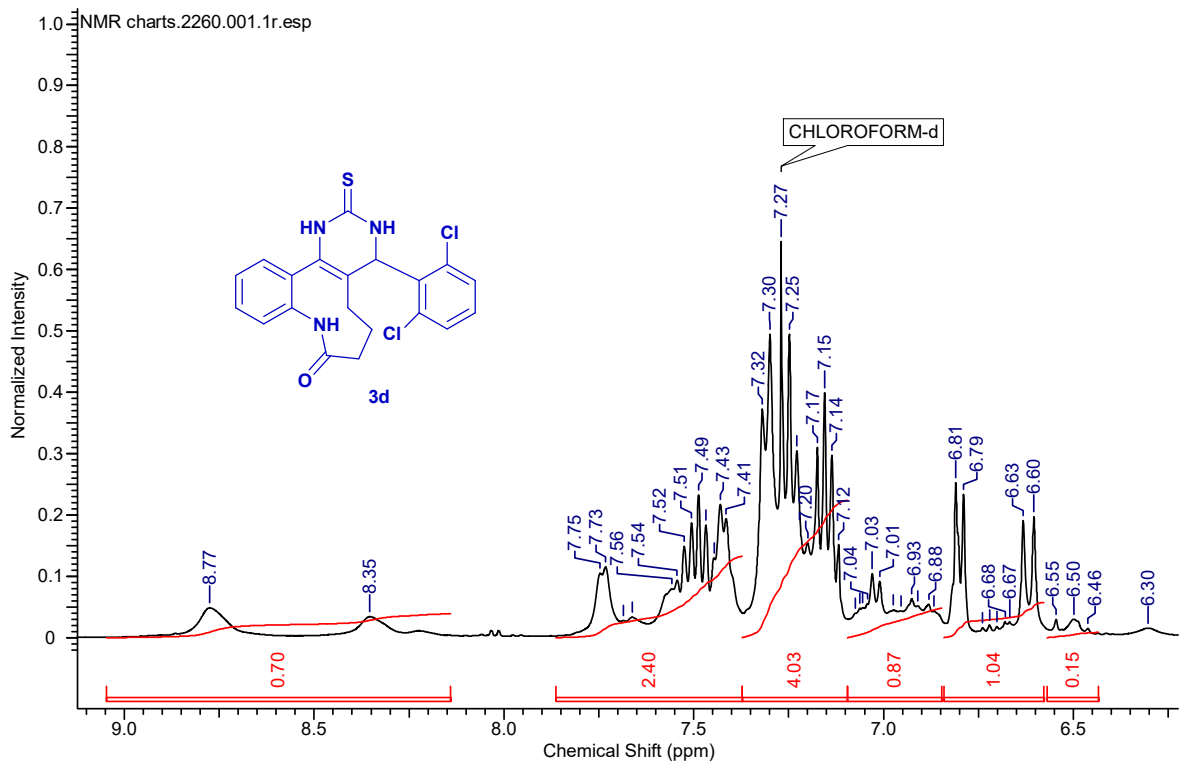

Fig. S20.  $^1\text{H}$ -NMR spectrum of compound 3d.



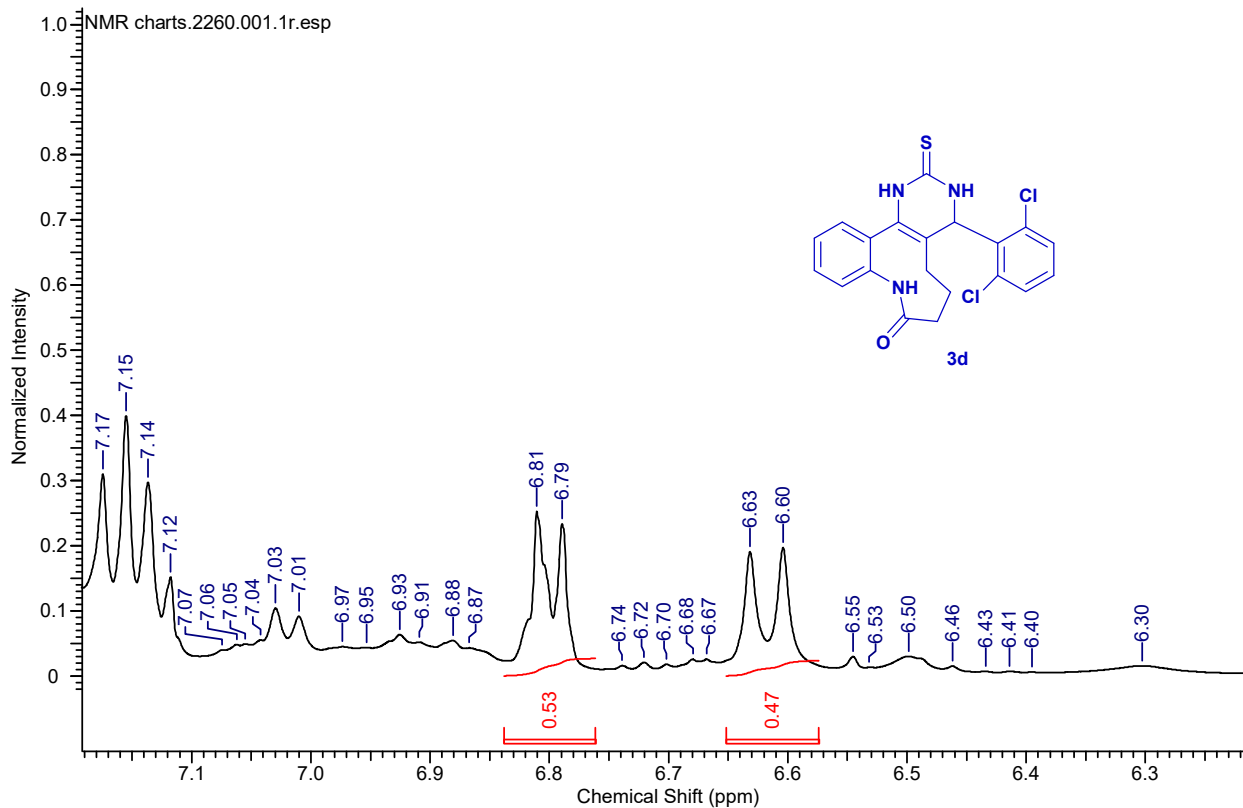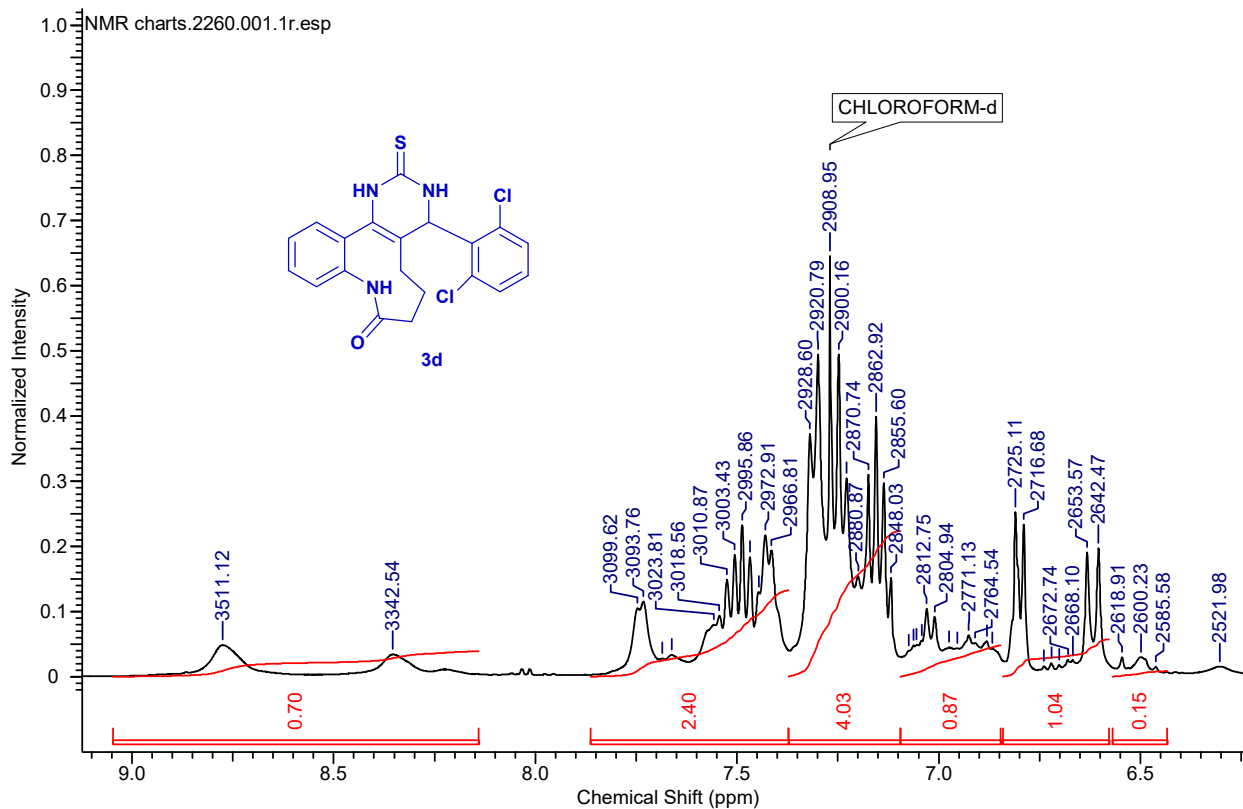

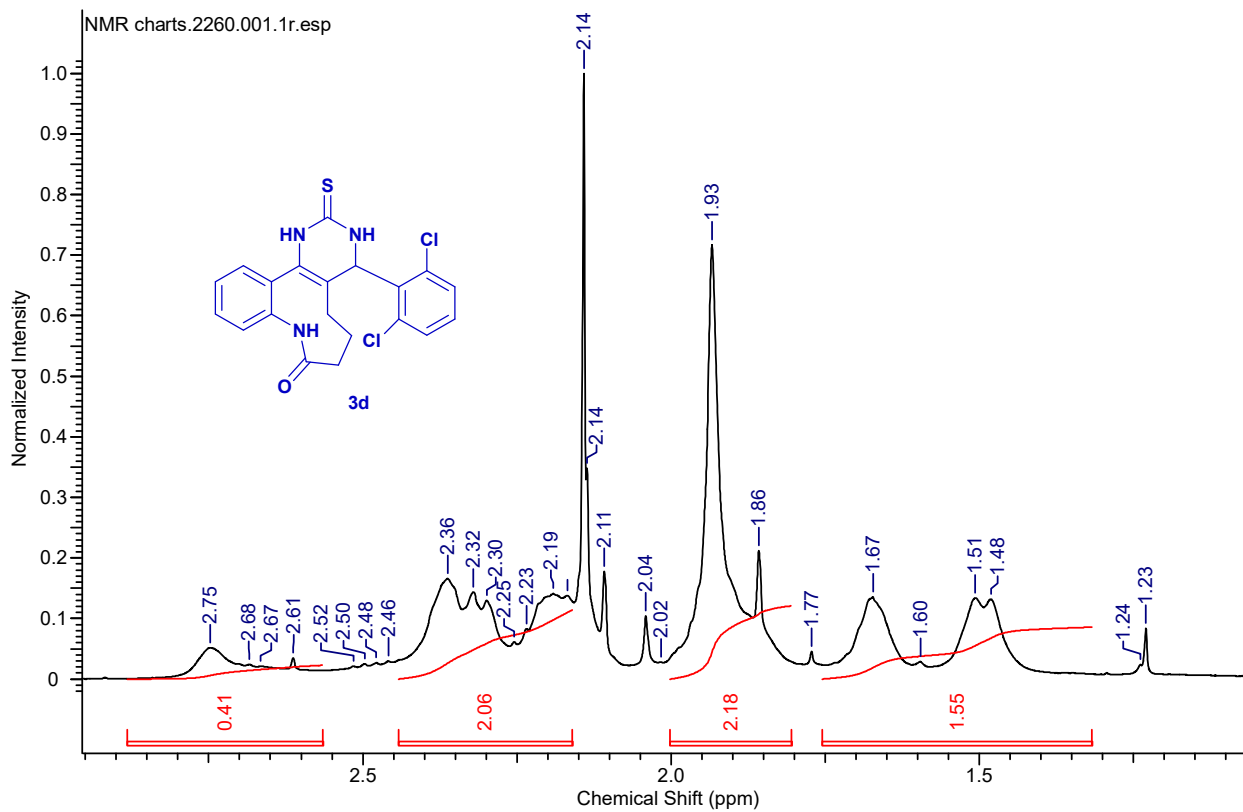

Fig. S20-A. <sup>1</sup>H-NMR spectrum of compound 3d.

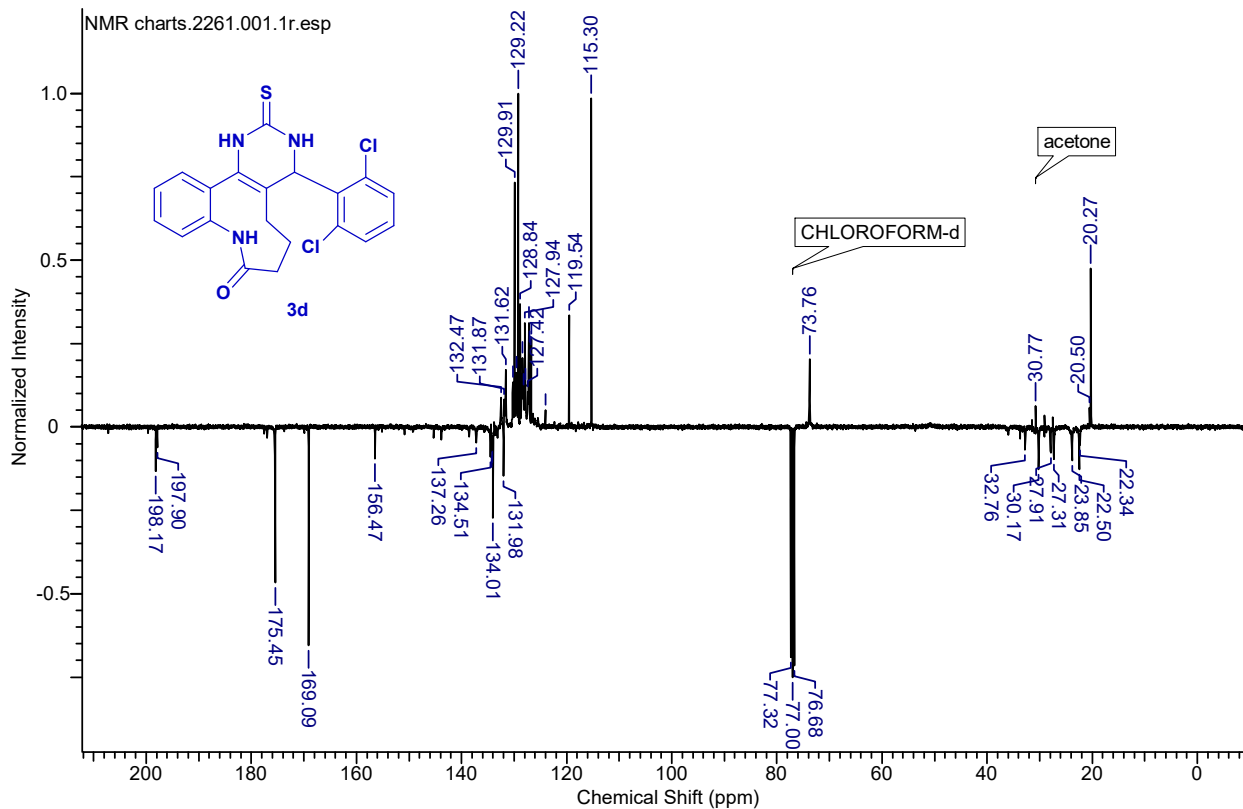

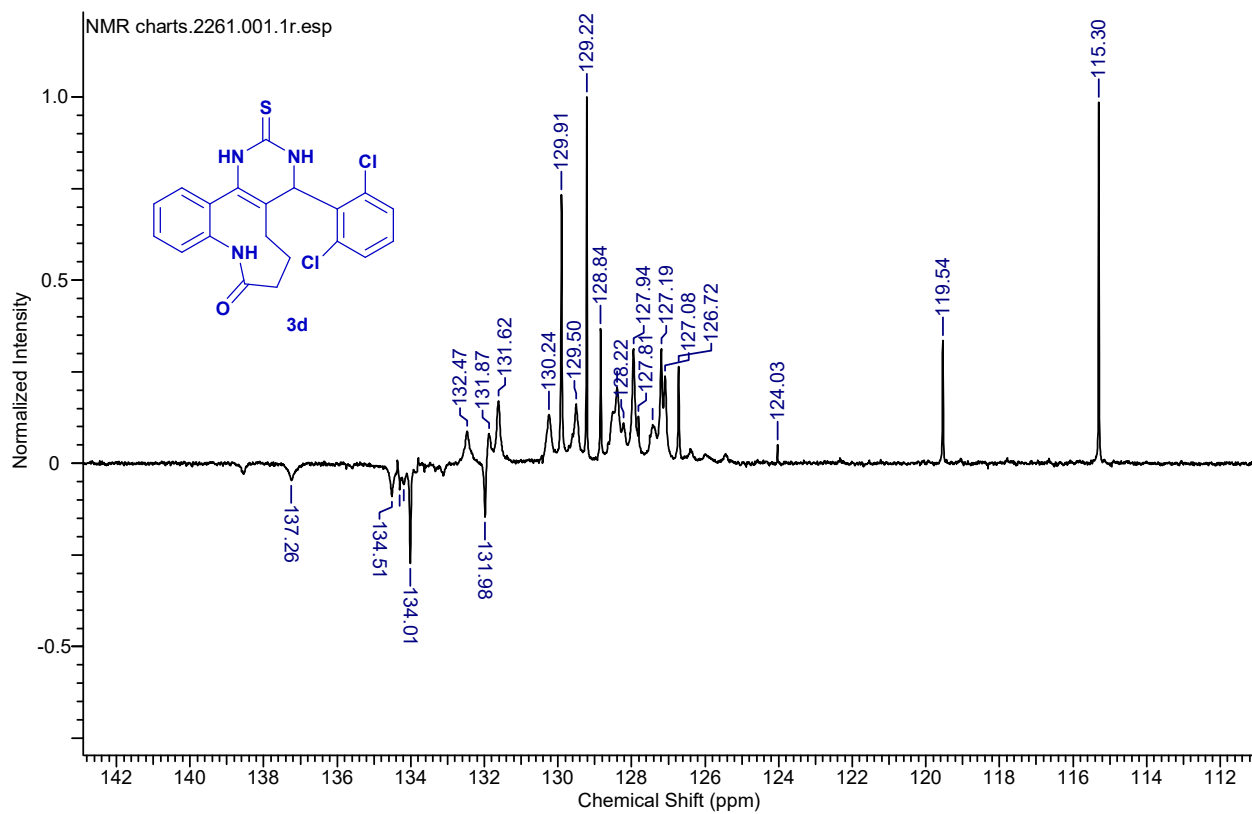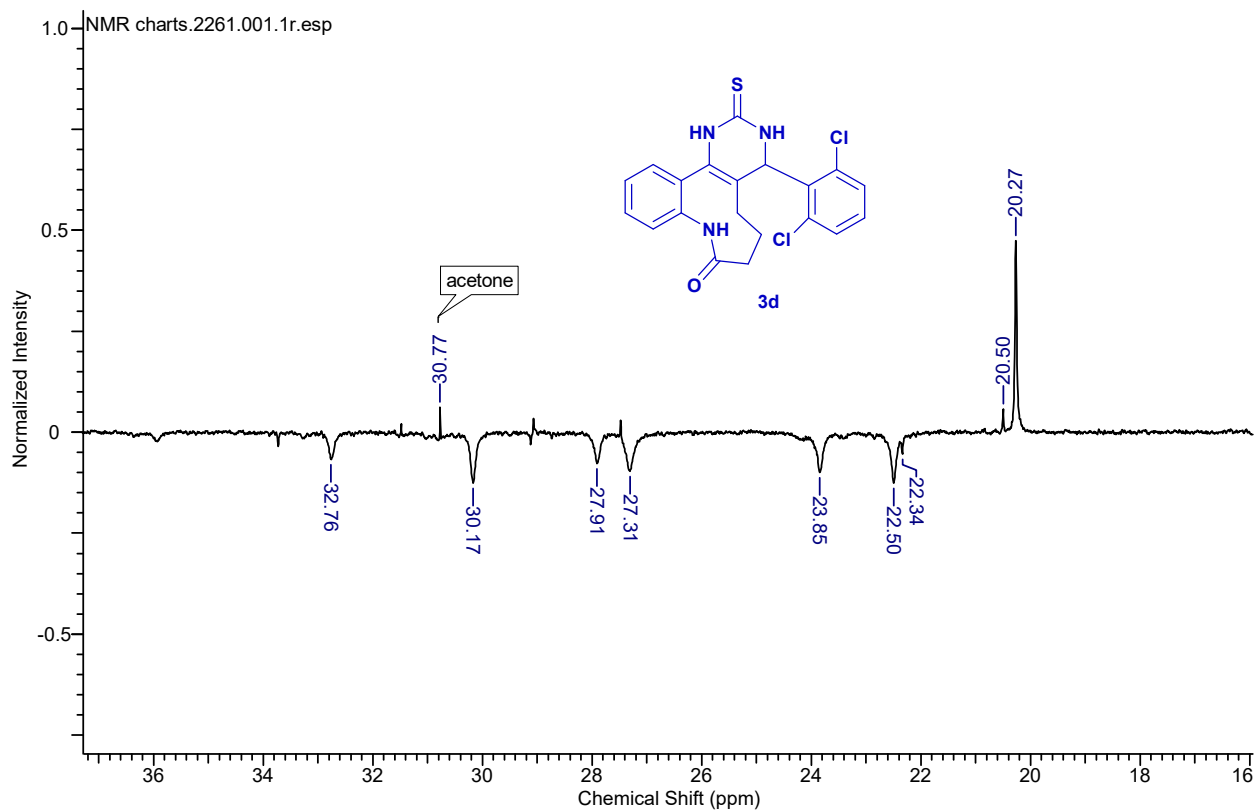

Fig. S21.  $^{13}\text{C}$ -NMR spectrum of compound **3d**.

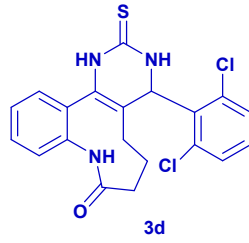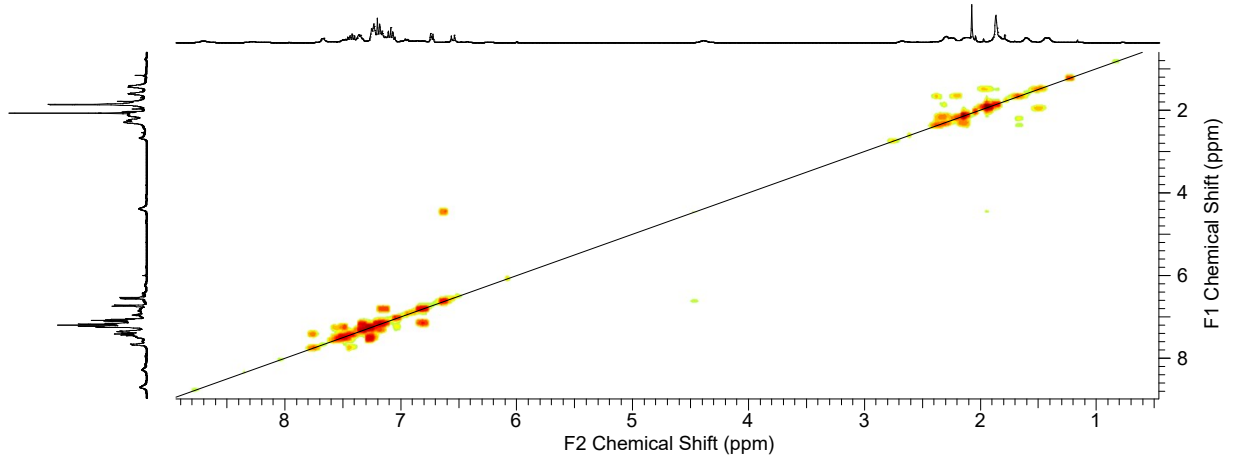

Fig. S22. 2D-NMR spectrum (COSY) of compound 3d.

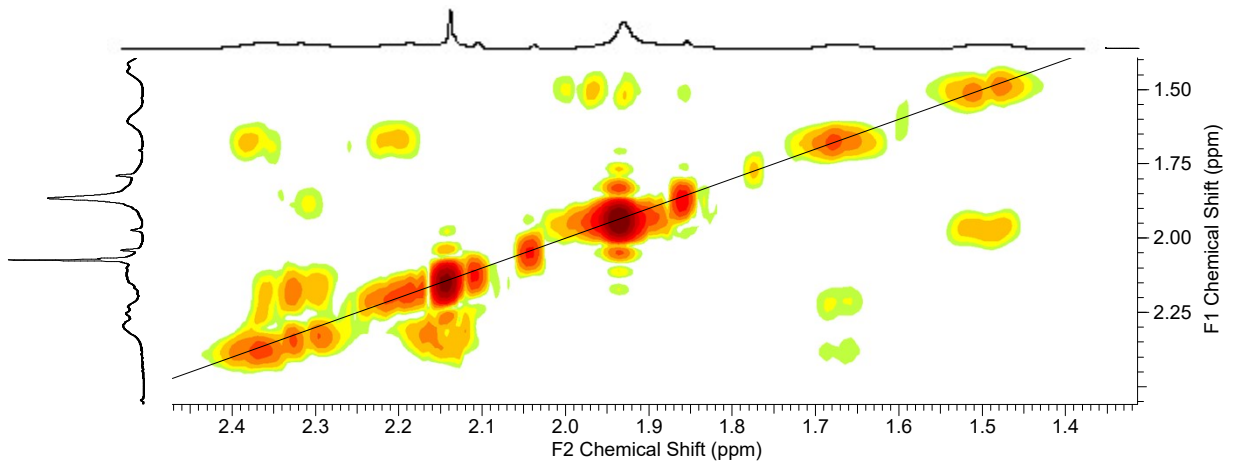

Fig. S23. 2D-NMR spectrum (COSY) of compound 3d.

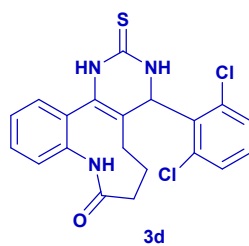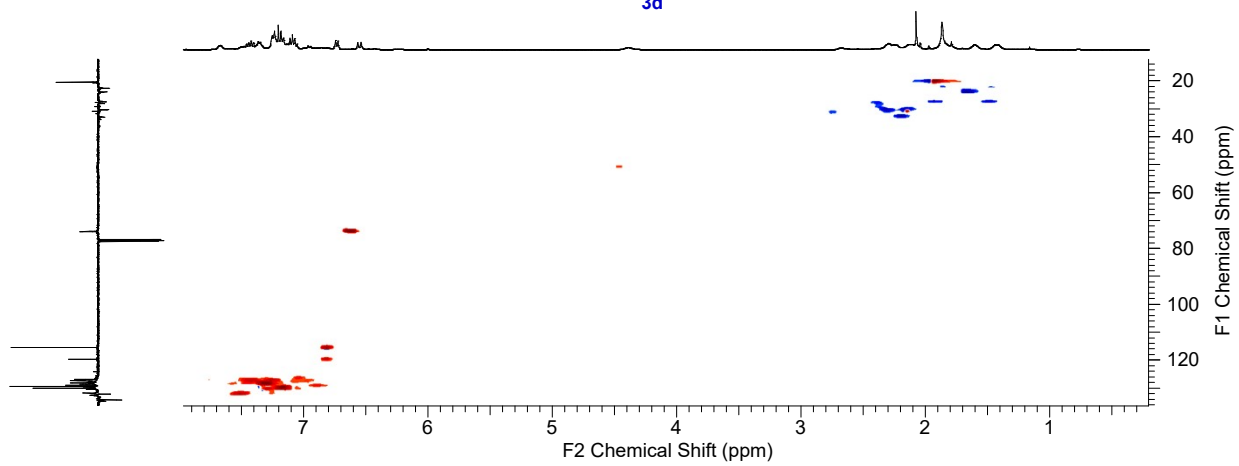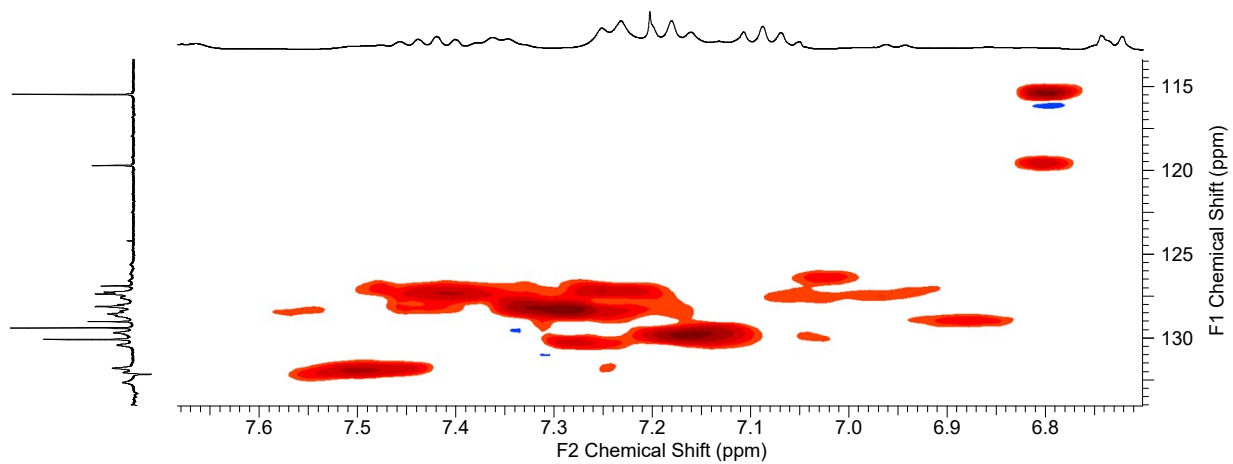

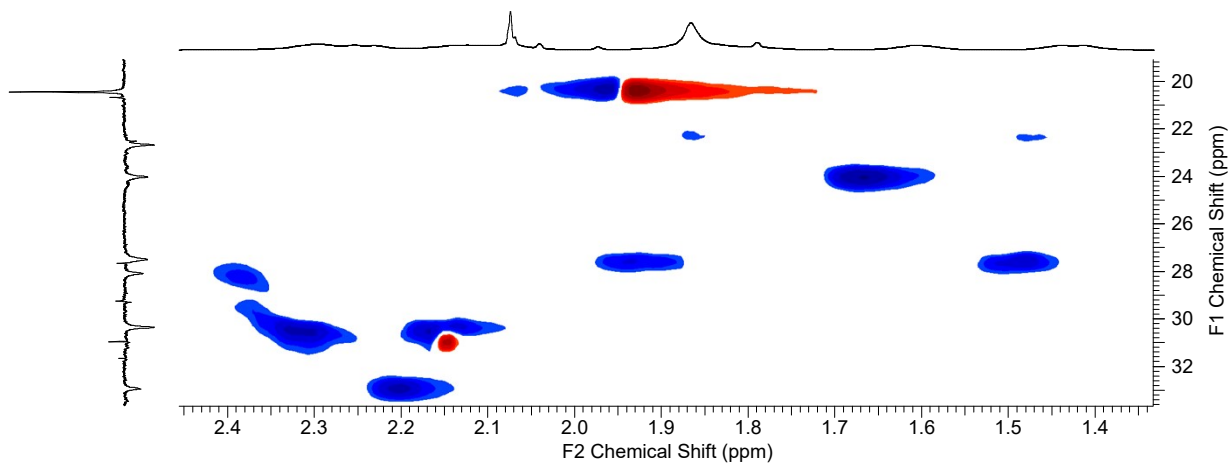

Fig. S24. 2D-NMR spectrum (HSQC) of compound 3d.

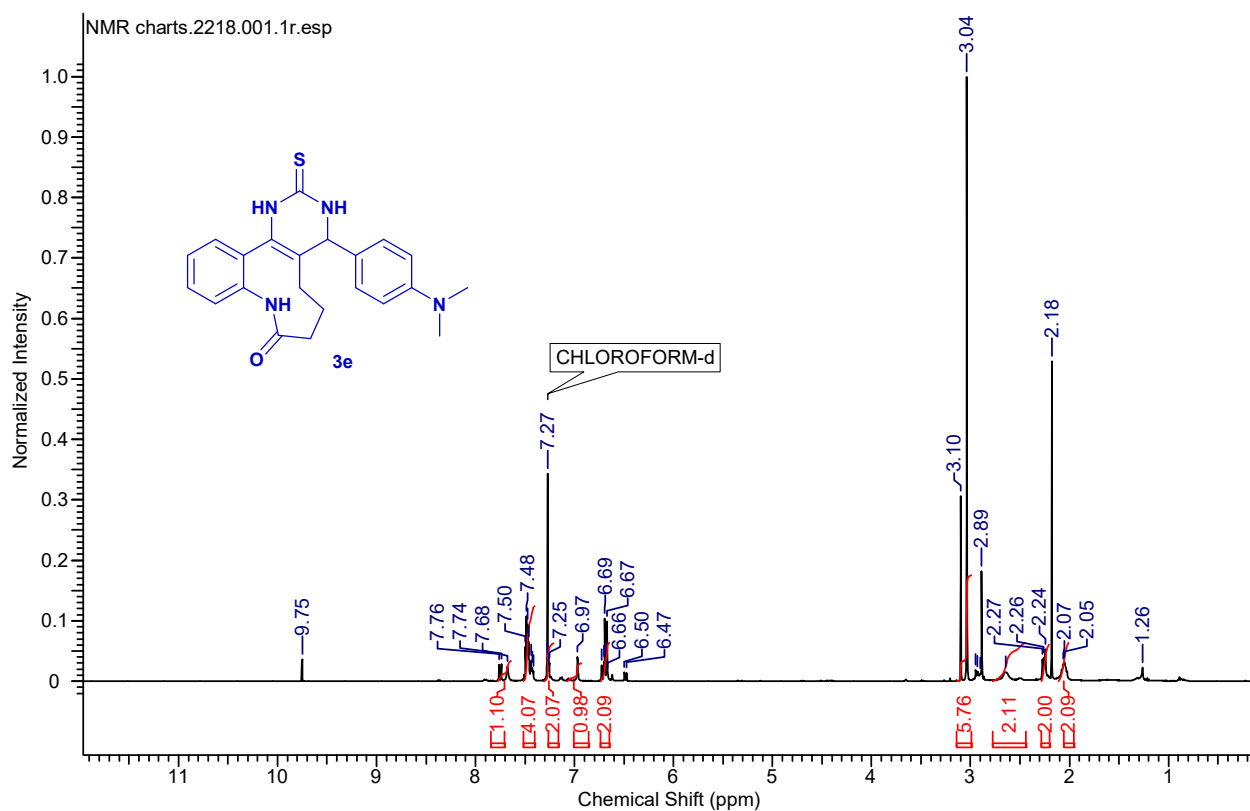

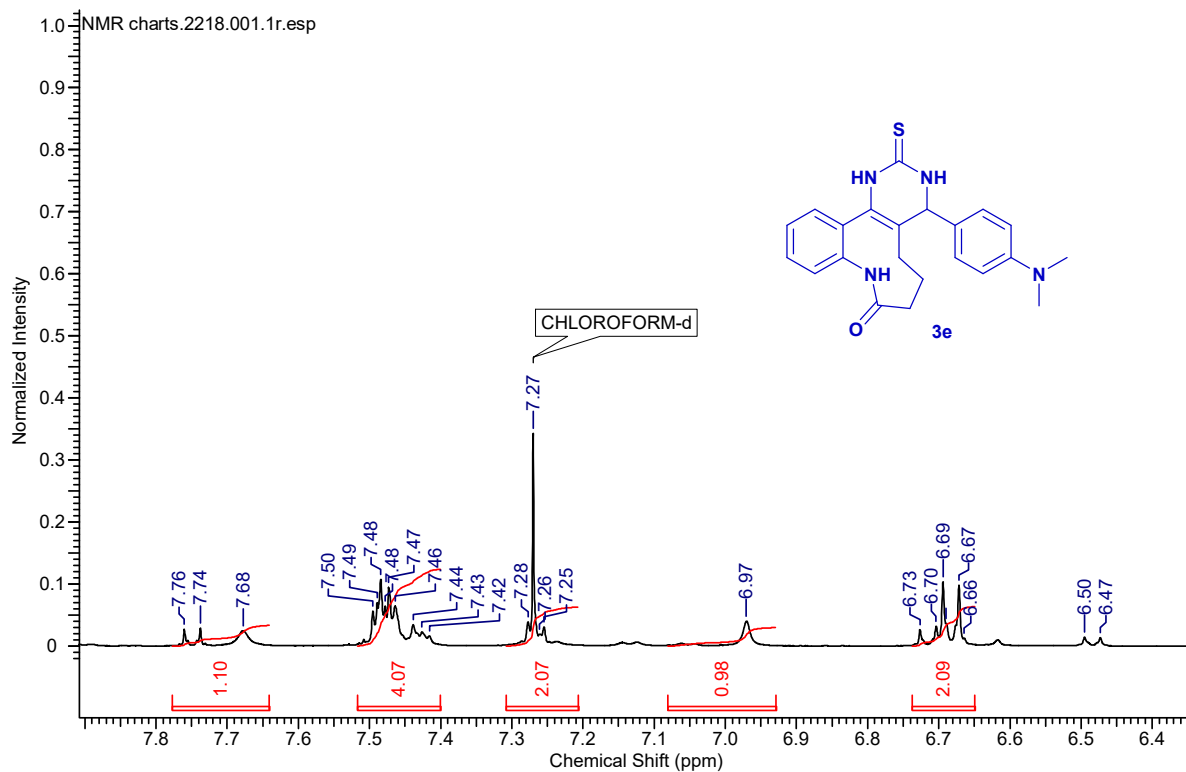

Fig. S25. <sup>1</sup>H-NMR spectrum of compound 3e.

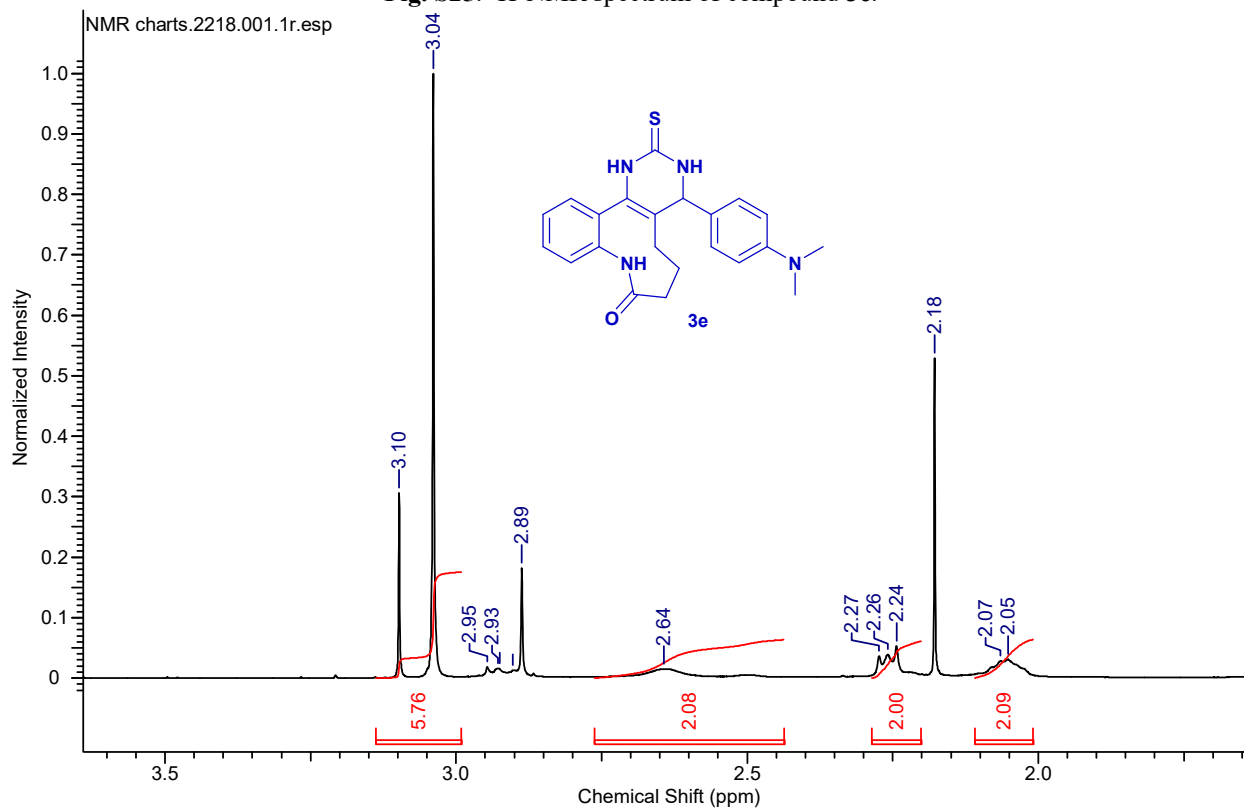

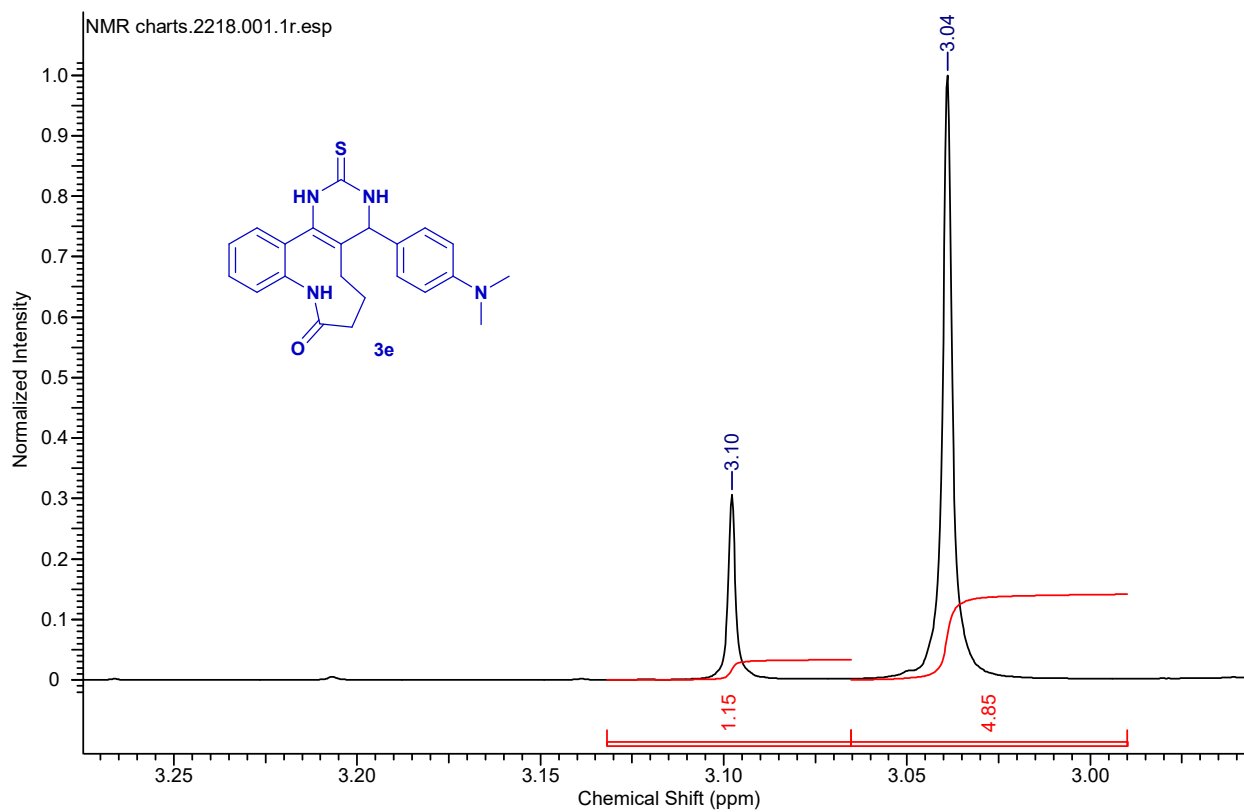

Fig. S25-A. <sup>1</sup>H-NMR spectrum of compound **3e**.

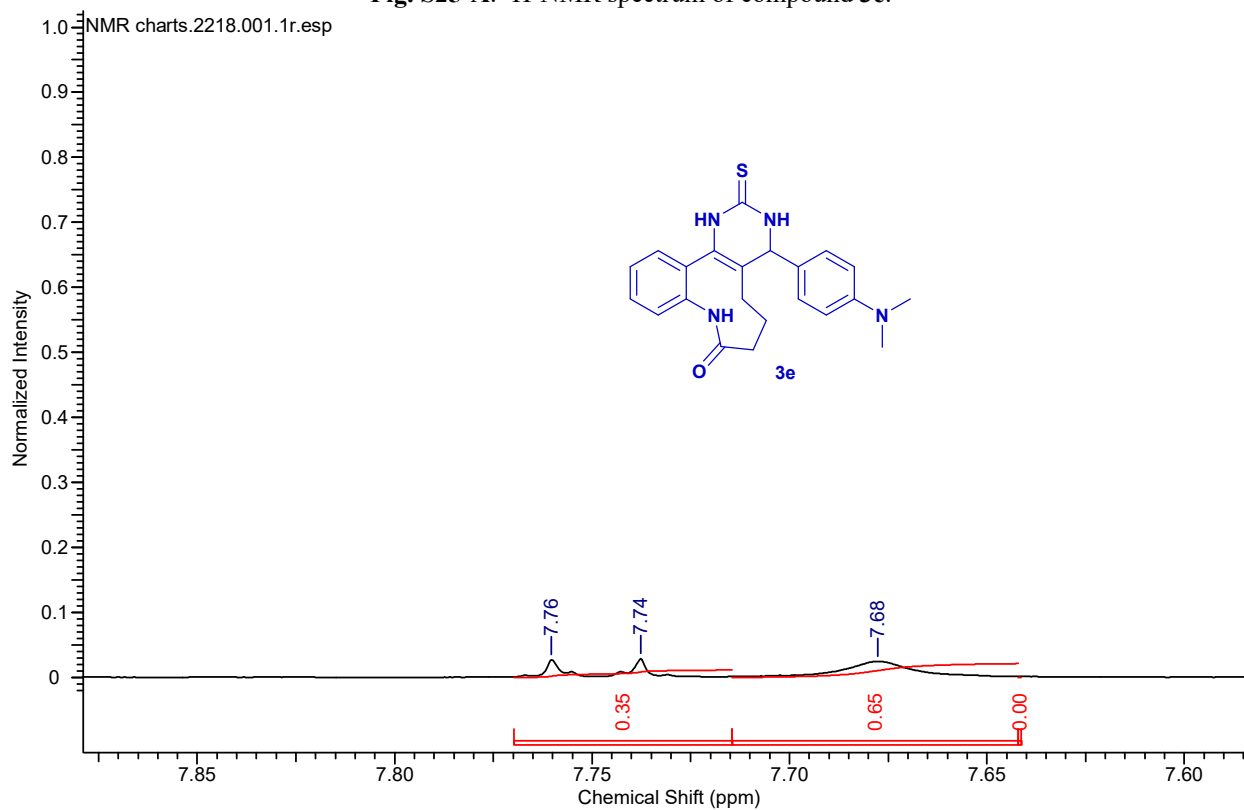

Fig. S25-B. <sup>1</sup>H-NMR spectrum of compound **3e**.



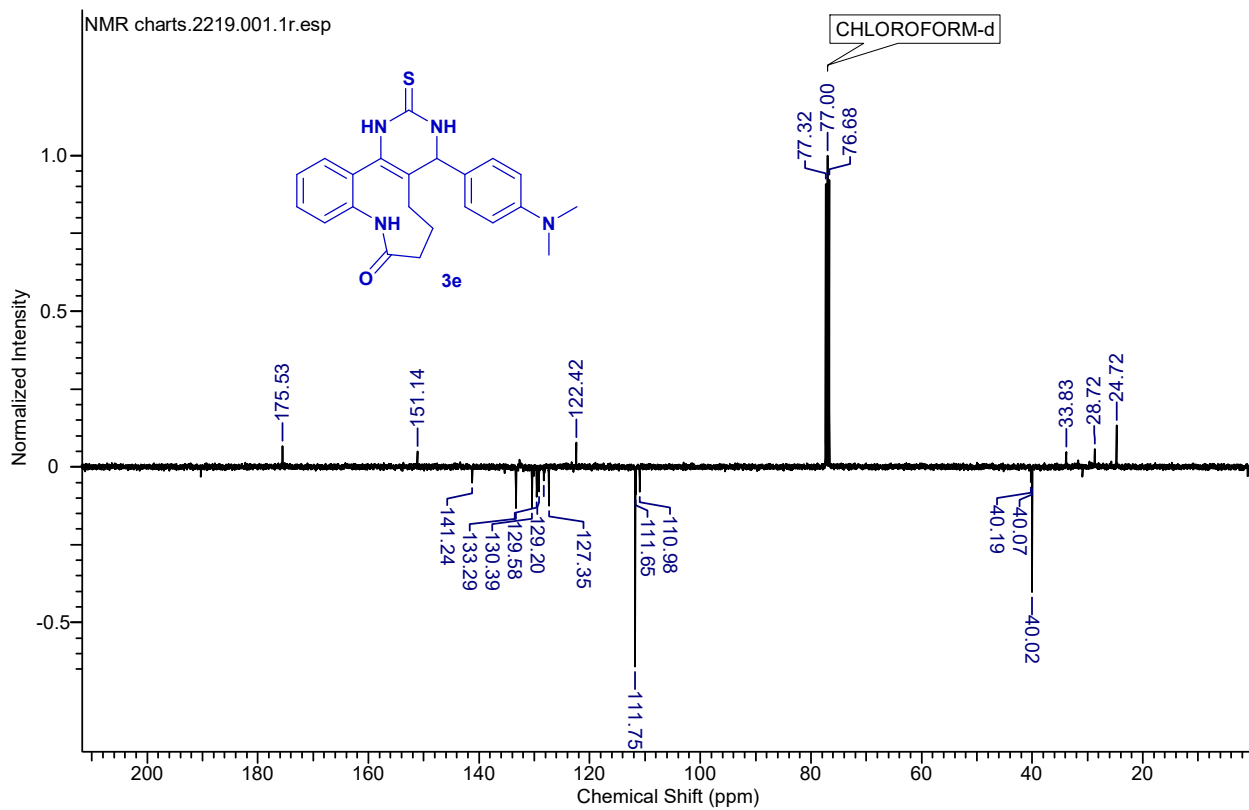

Fig. S26. <sup>13</sup>C-NMR spectrum of compound 3e.

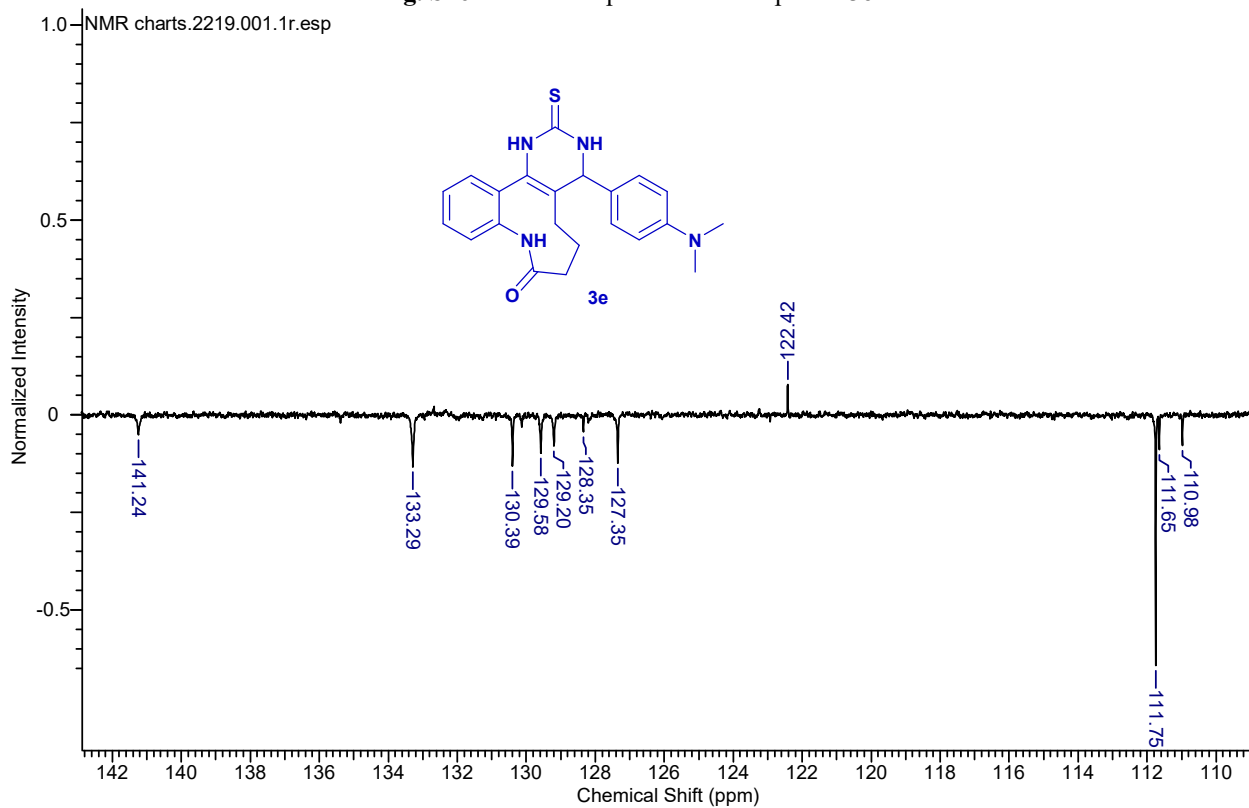

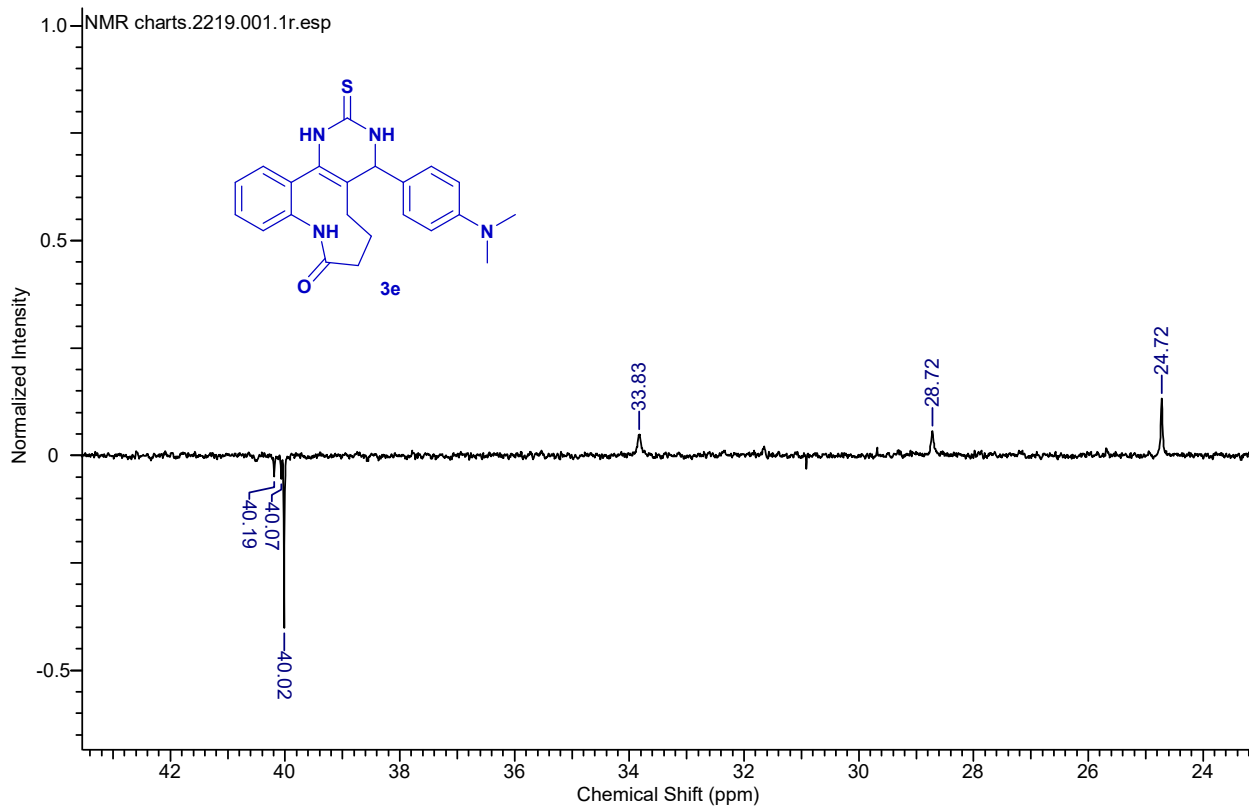

Fig. S26-A.  $^{13}\text{C}$ -NMR spectrum of compound **3e**.

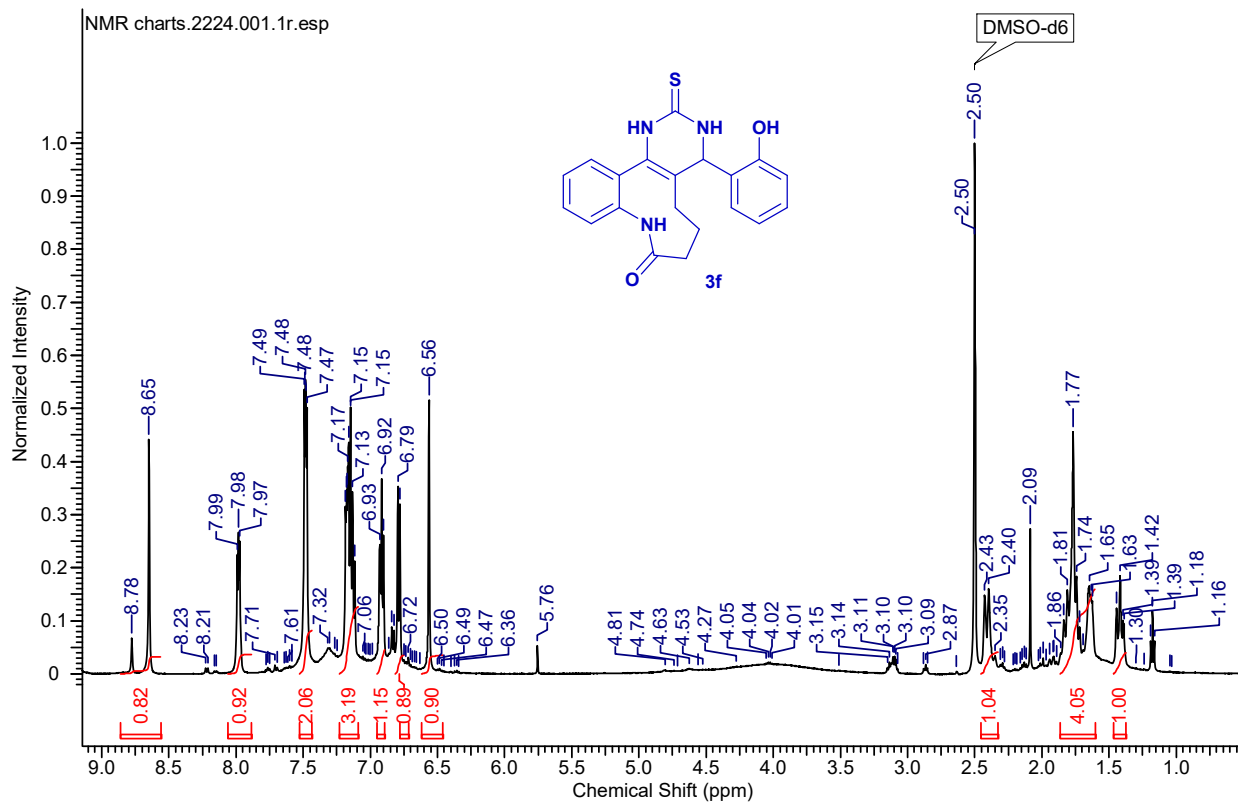

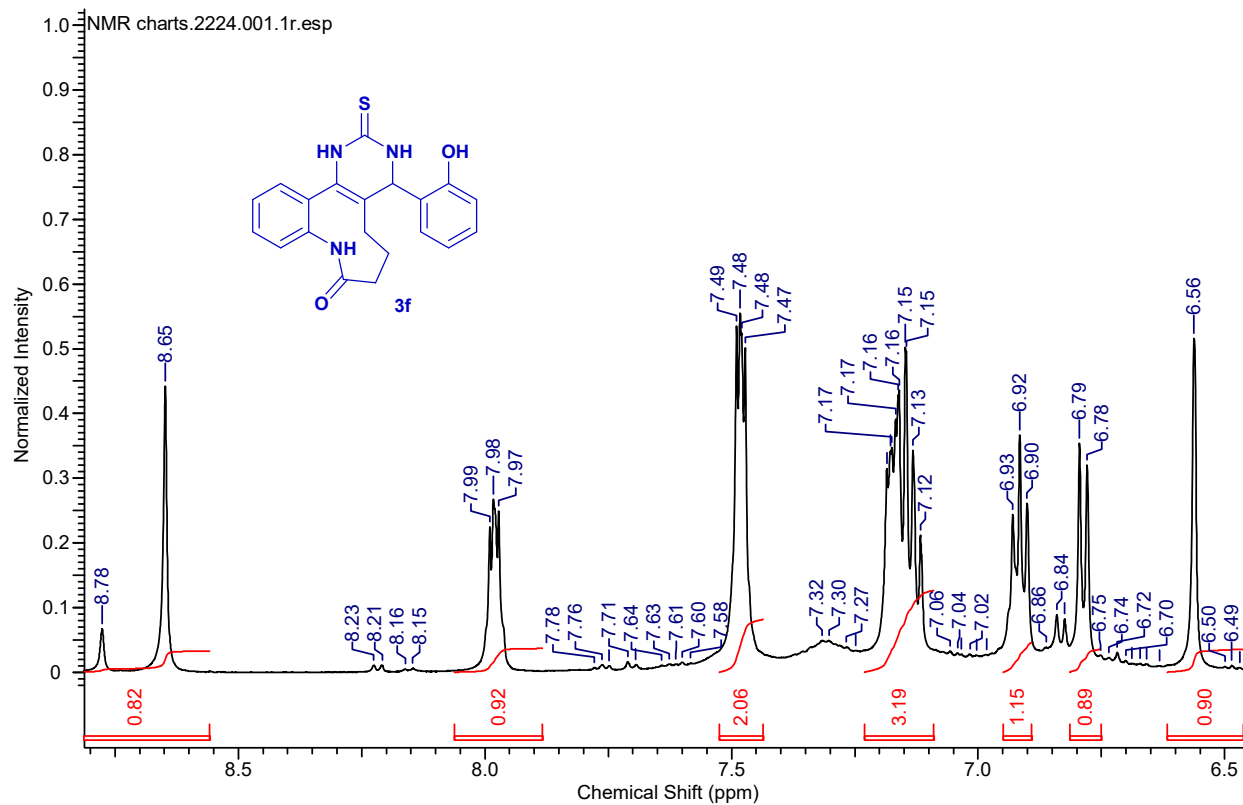

Fig. S27. <sup>1</sup>H-NMR spectrum of compound **3f**.

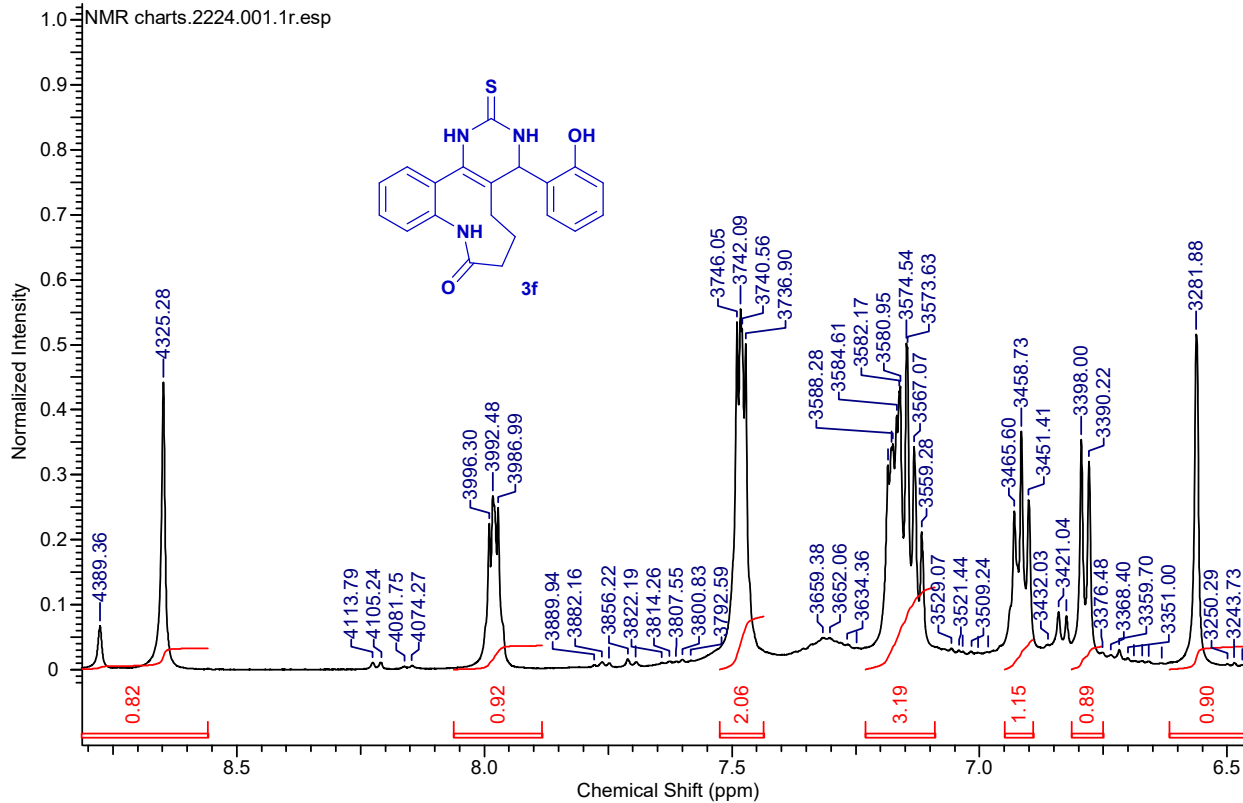

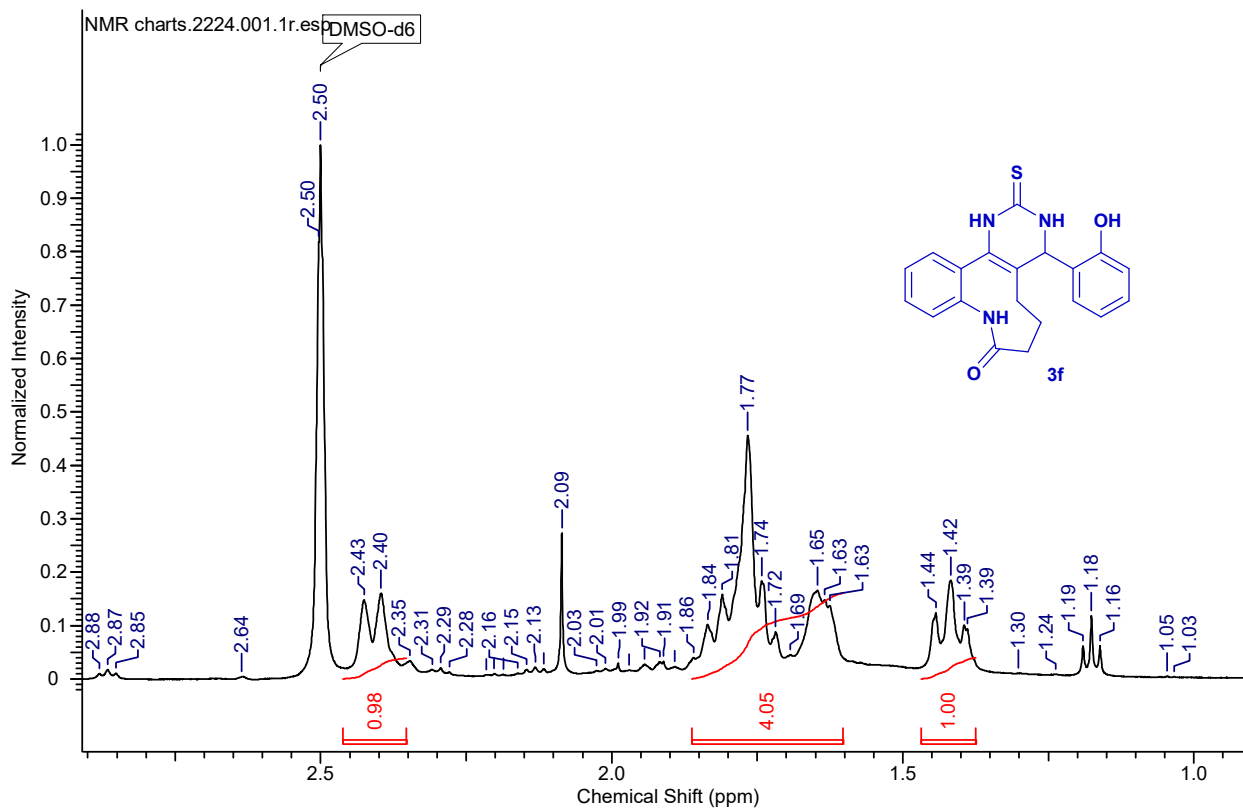

Fig. S27. <sup>1</sup>H-NMR spectrum of compound 3f.

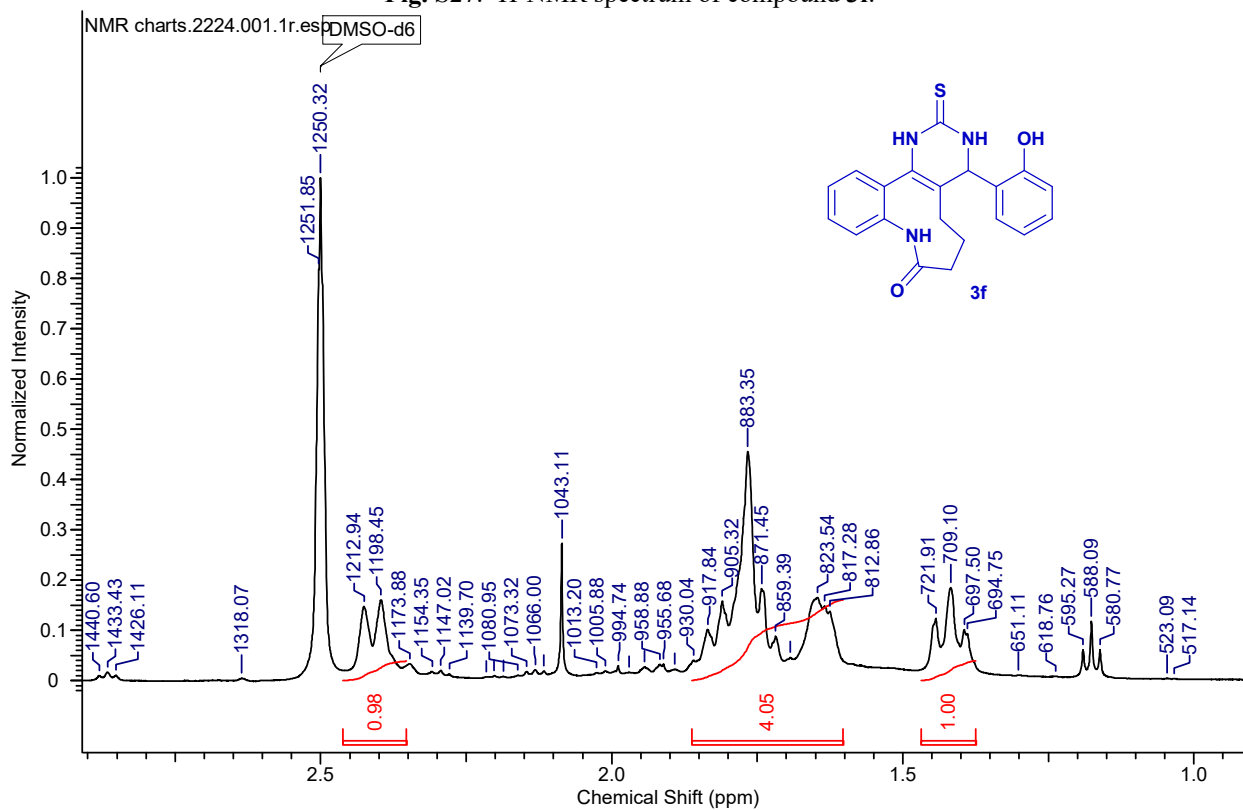

Fig. S27. <sup>1</sup>H-NMR spectrum of compound 3f.

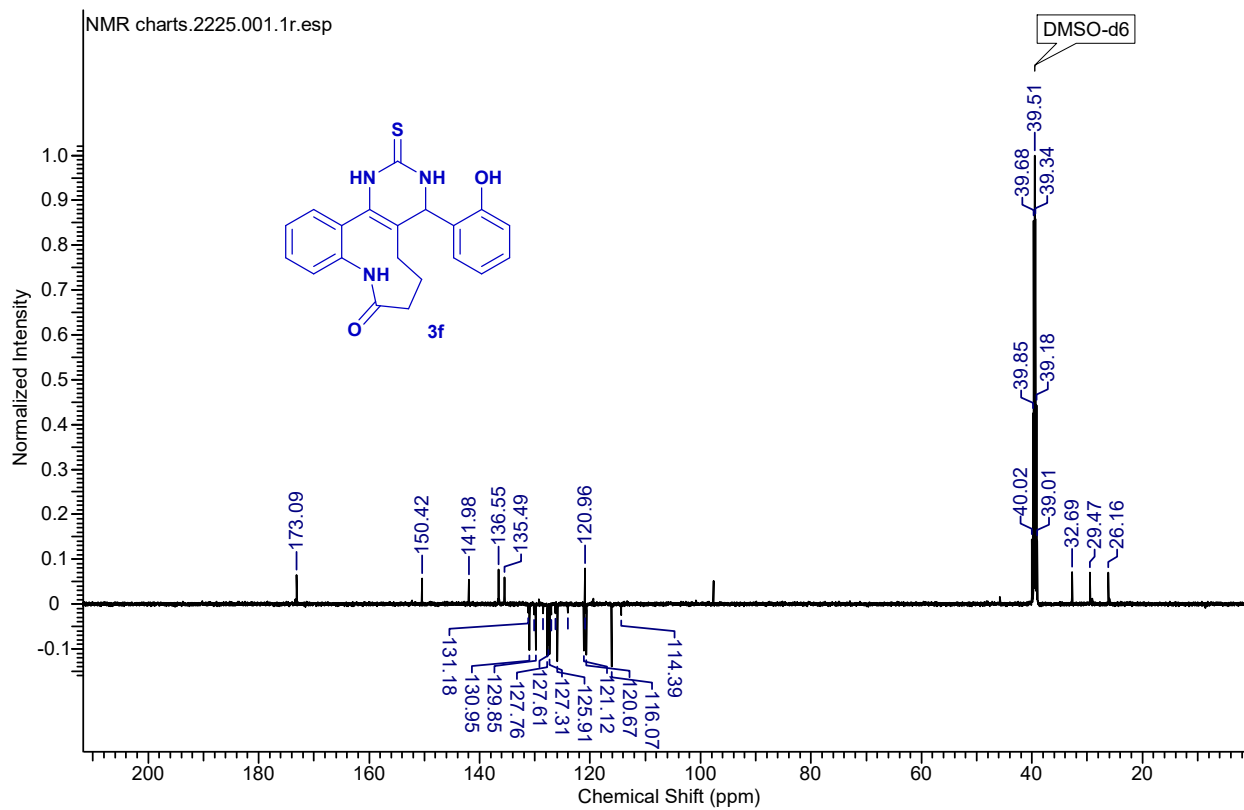

Fig. S28.  $^{13}\text{C}$ -NMR spectrum of compound **3f**.

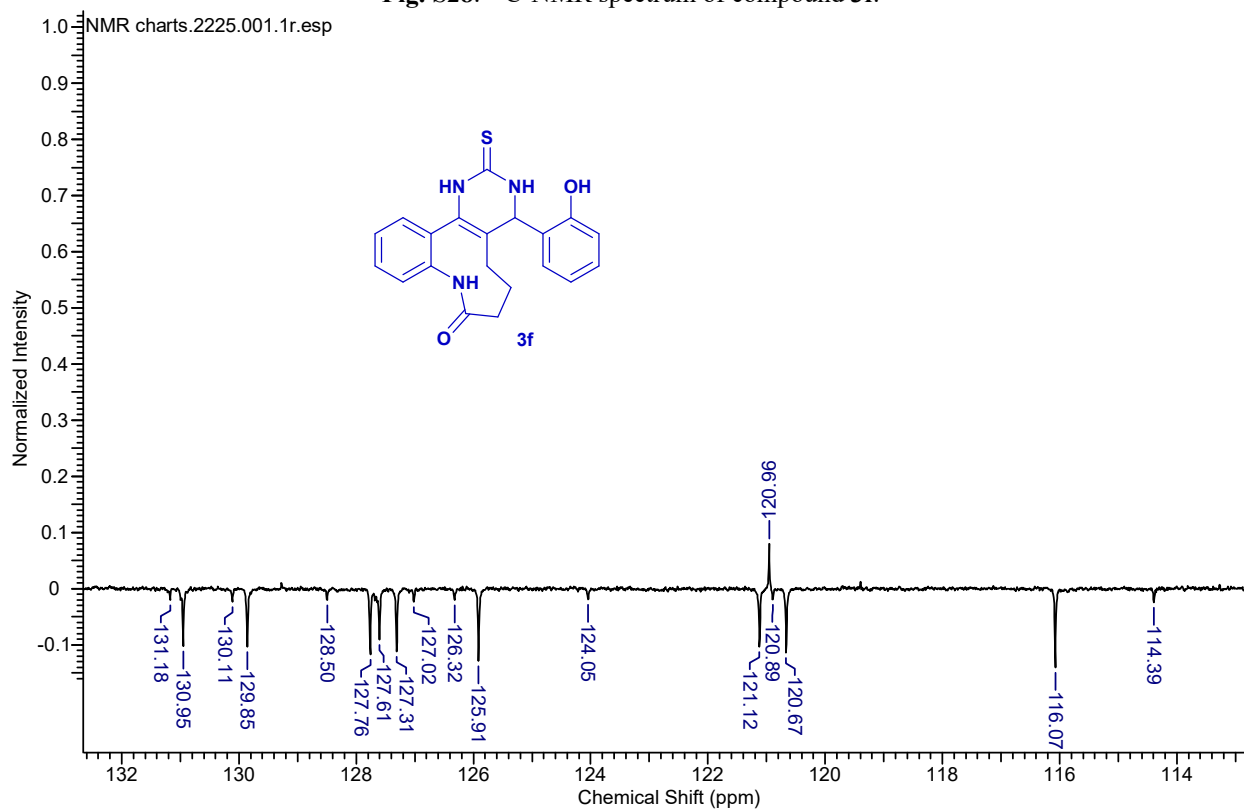

Fig. S28-a.  $^{13}\text{C}$ -NMR spectrum of compound **3f**.

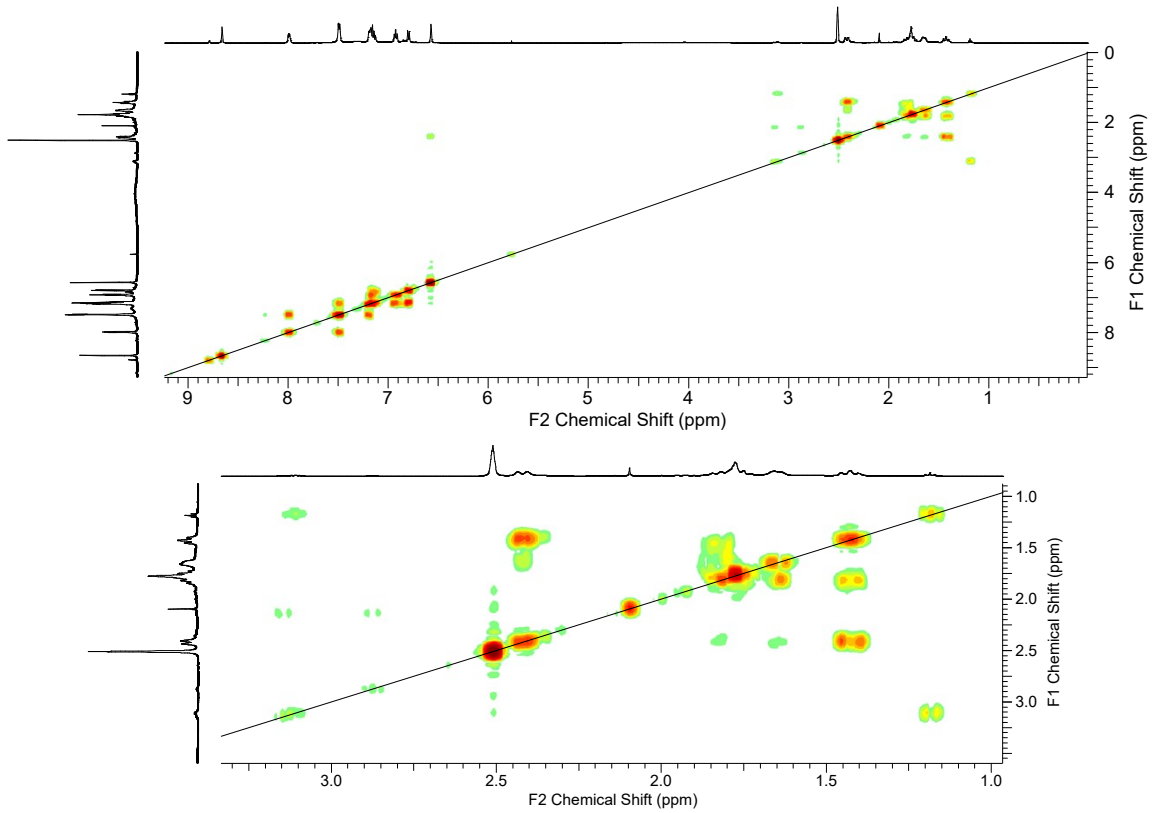

**Fig. S29.** 2D-NMR spectrum (COSY) of compound **3f**.

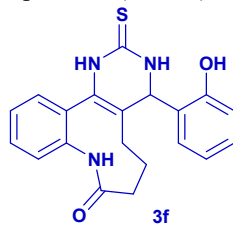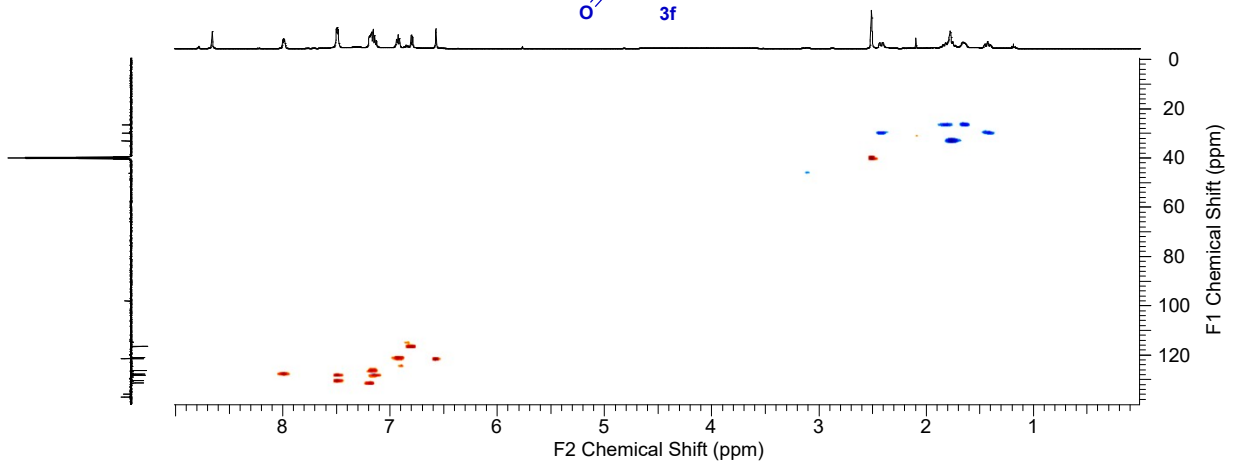

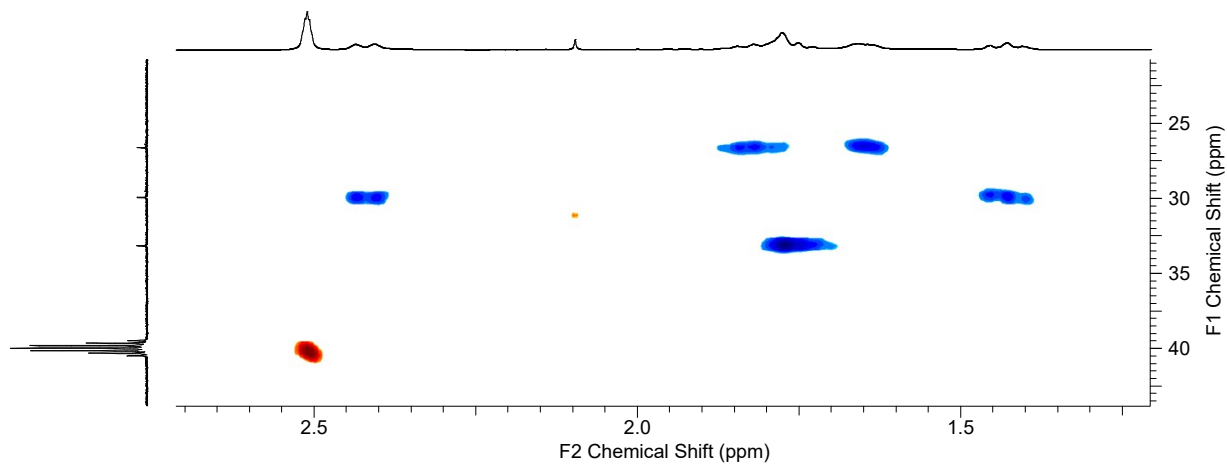

**Fig. S30.** 2D-NMR spectrum (HSQC) of compound 3f.

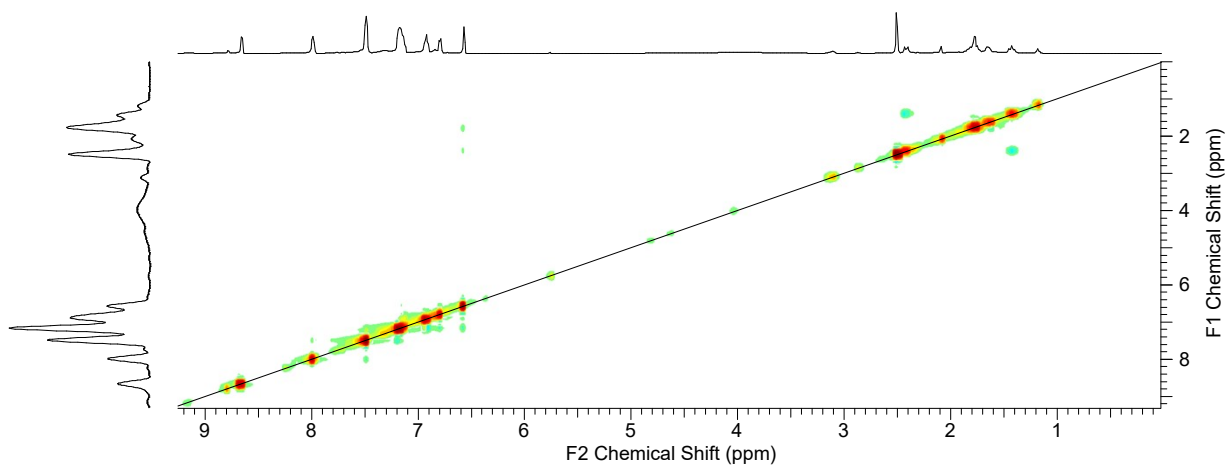

**Fig. S31.** 2D-NMR spectrum (NOESY) of compound 3f.

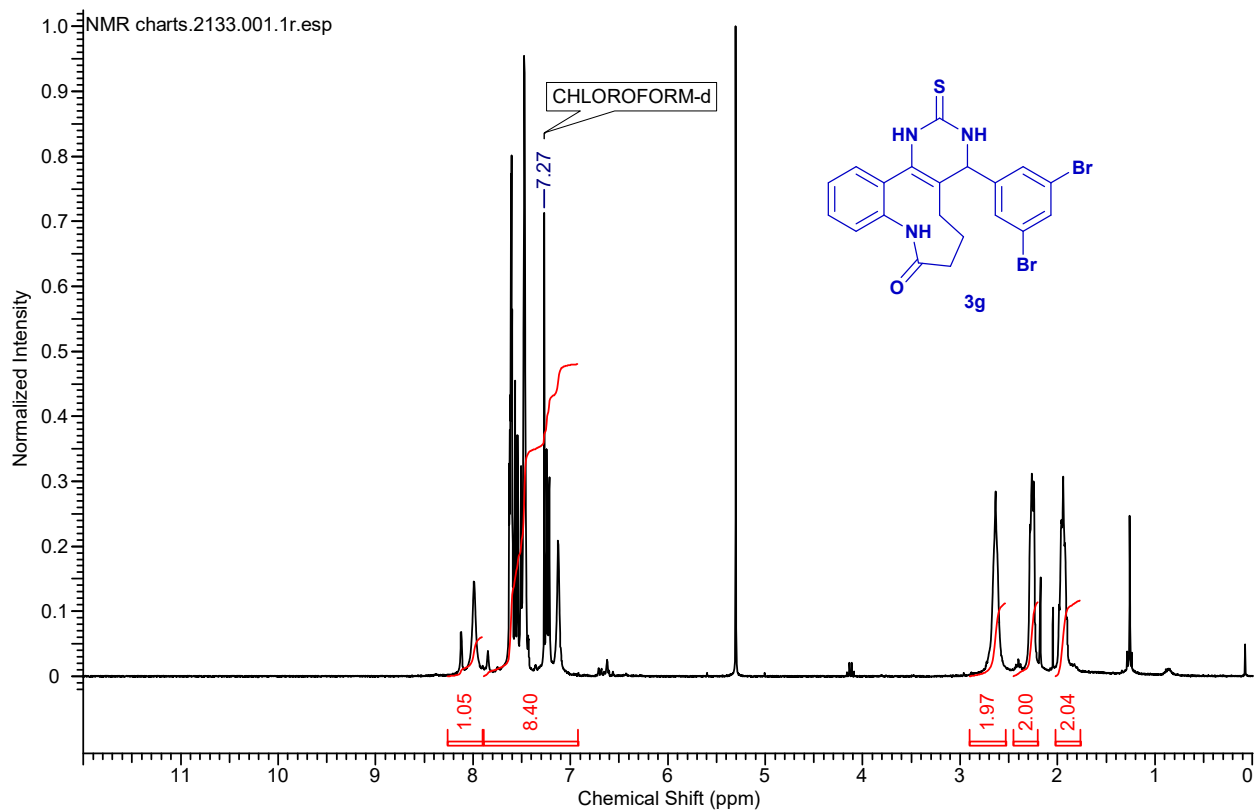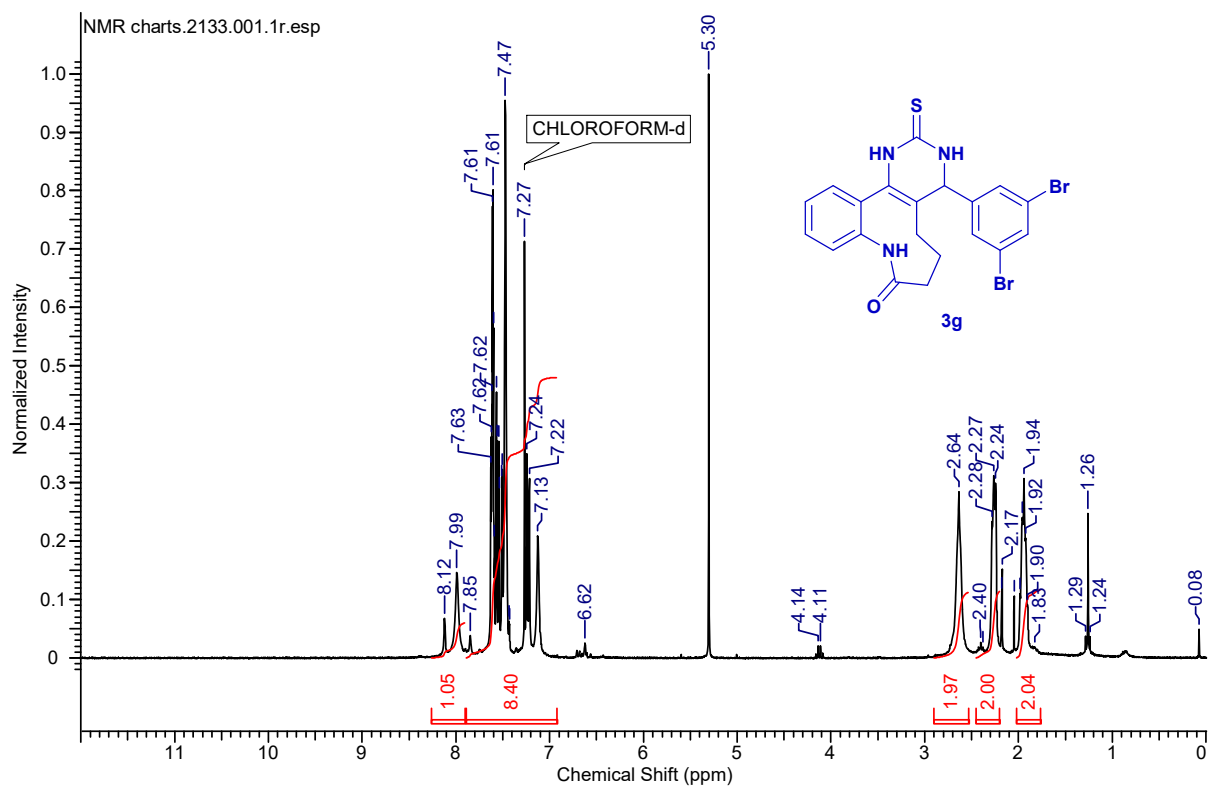

Fig. S32.  $^1\text{H}$ -NMR spectrum of compound 3g.



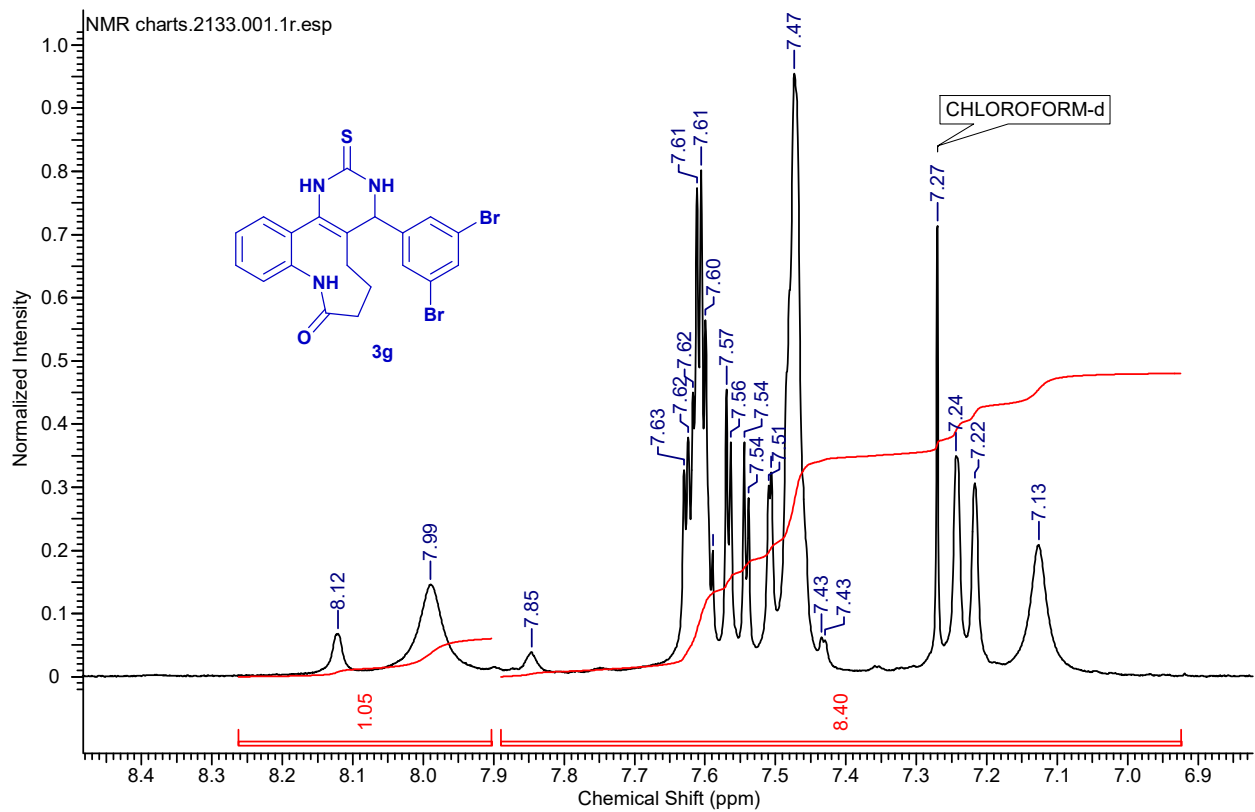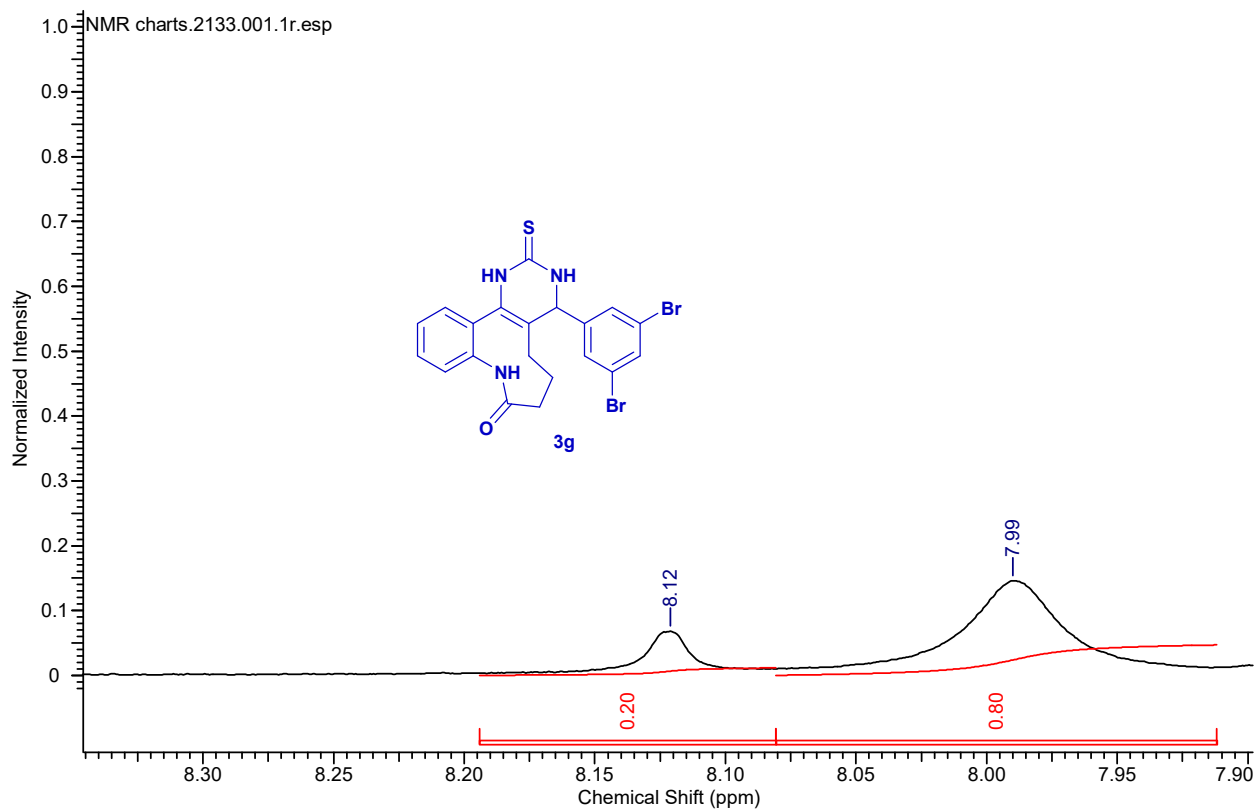

Fig. S32.  $^1\text{H-NMR}$  spectrum of compound **3g**.

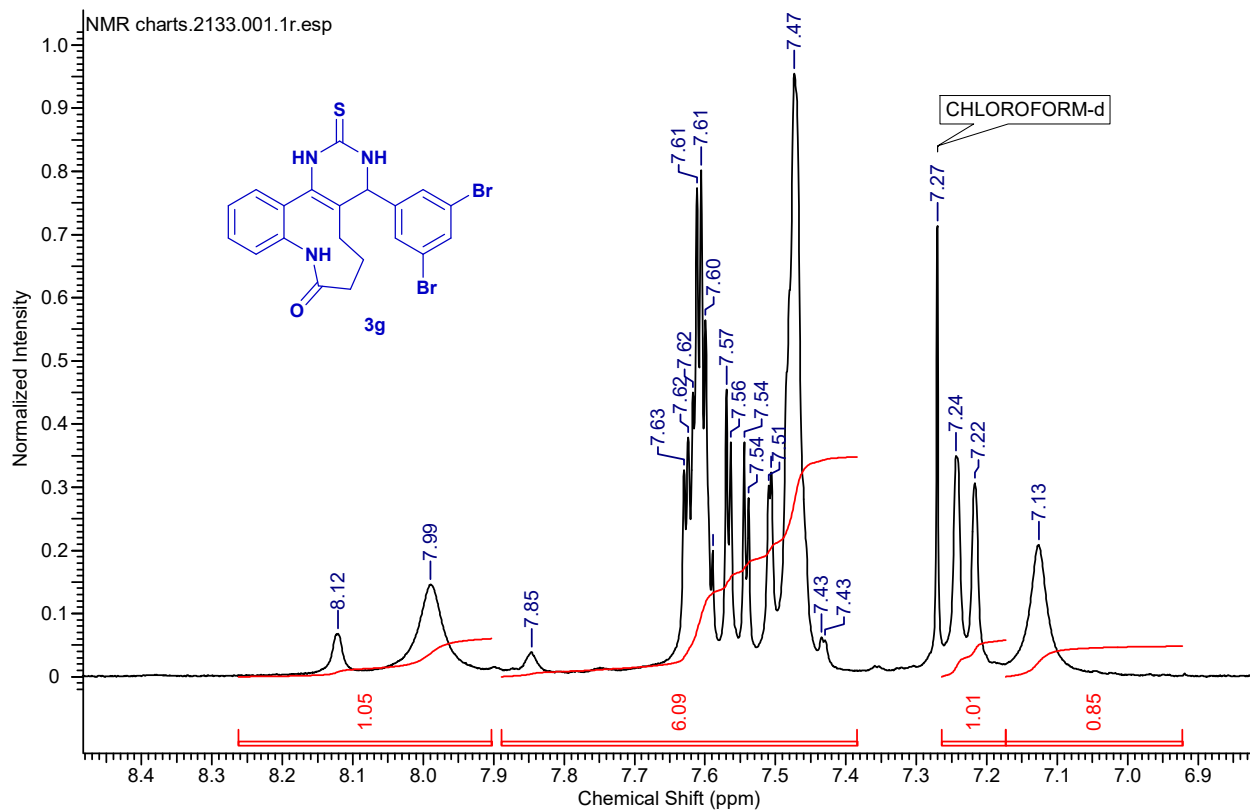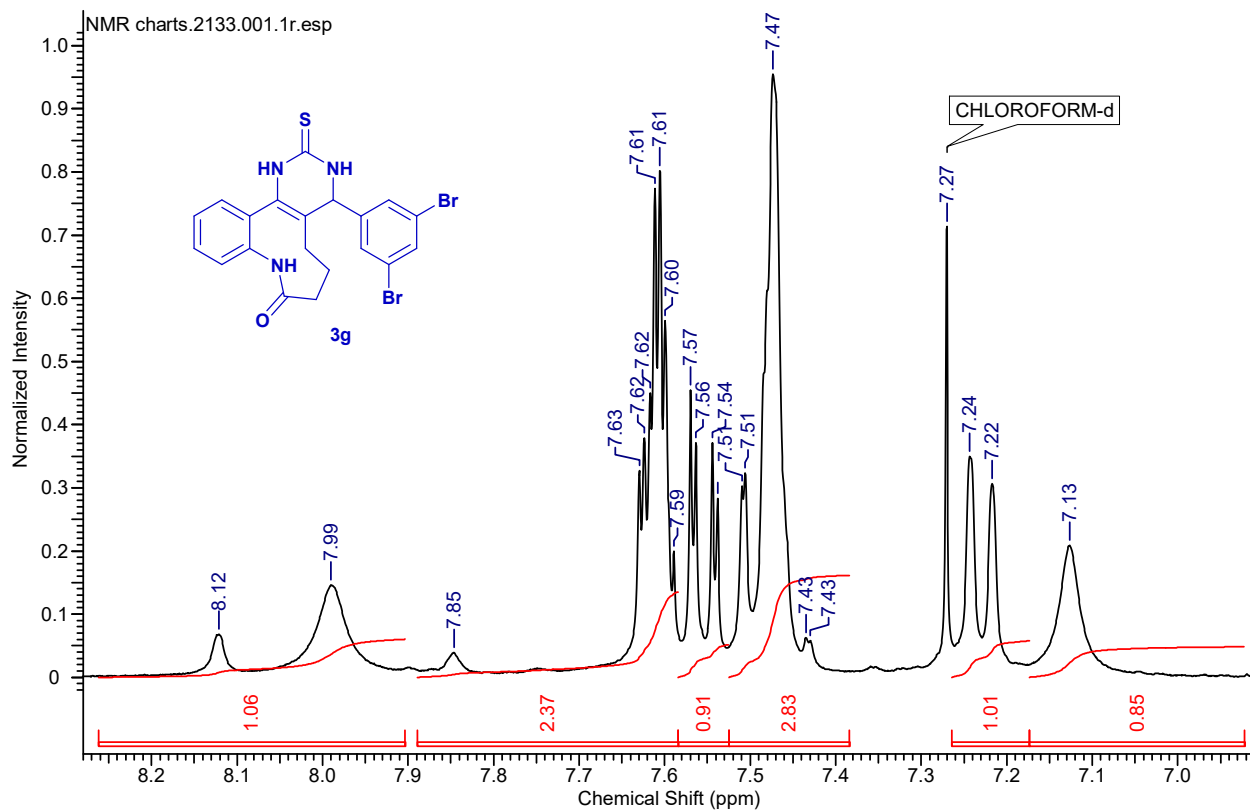

Fig. S32.  $^1\text{H-NMR}$  spectrum of compound **3g**.

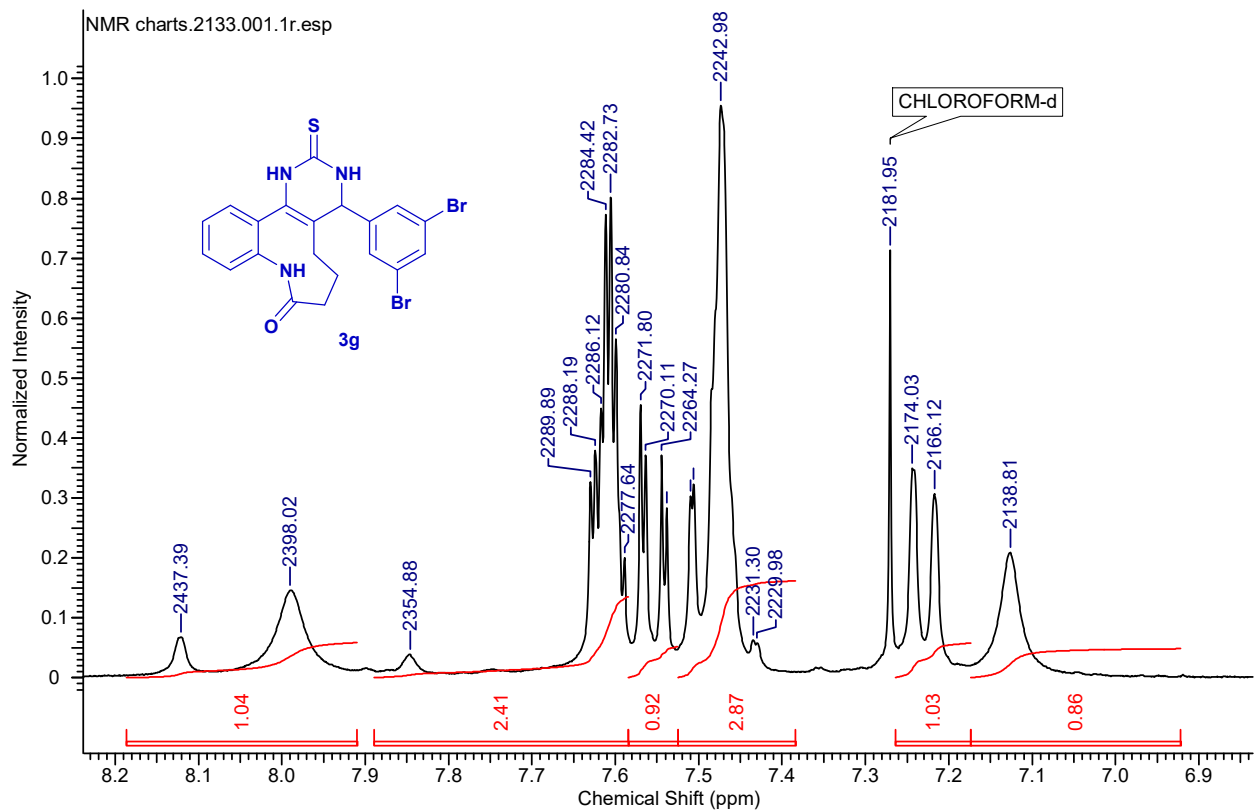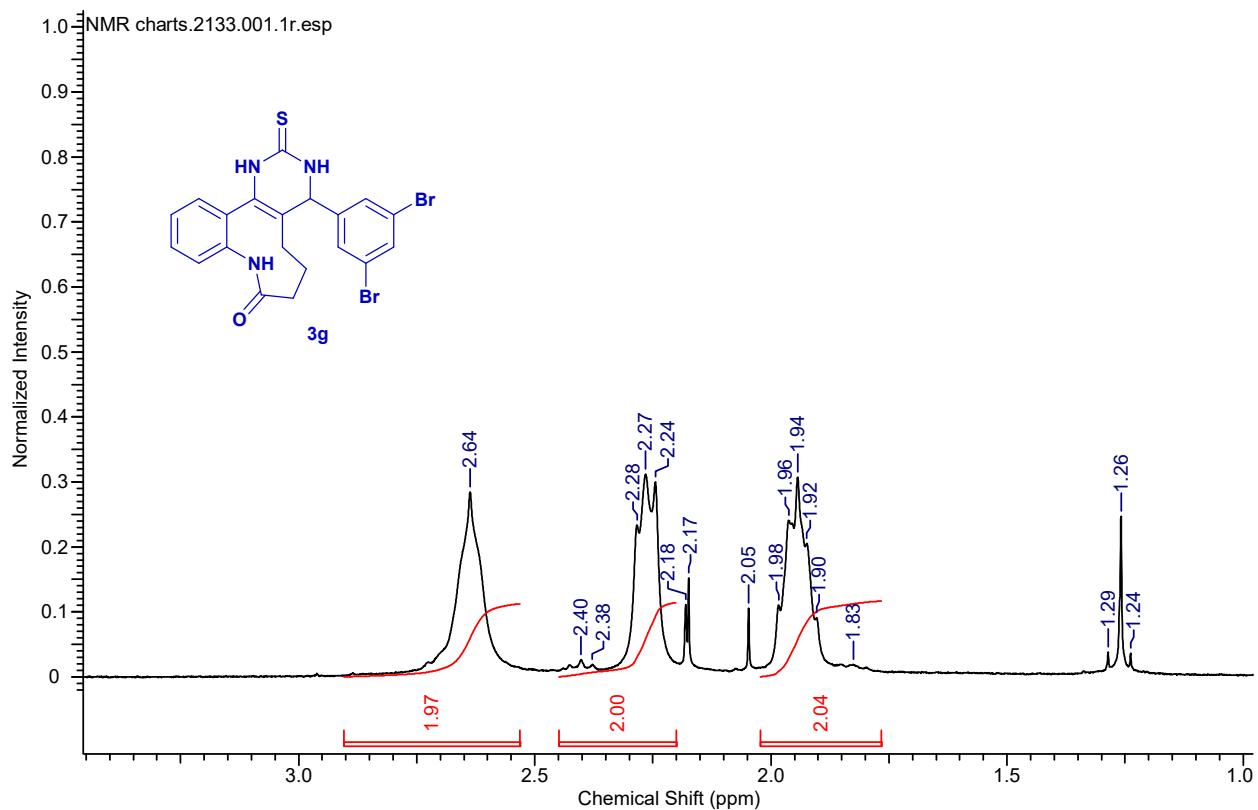

Fig. S32. <sup>1</sup>H-NMR spectrum of compound 3g.

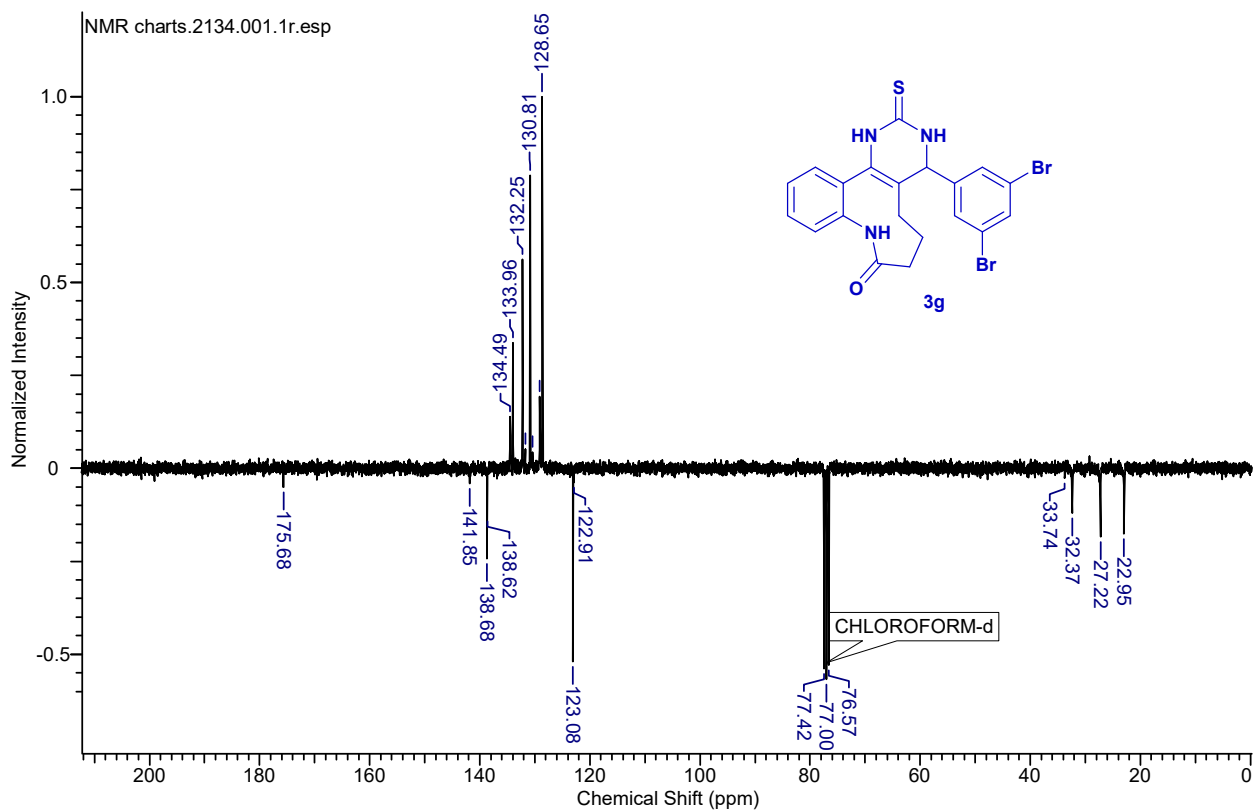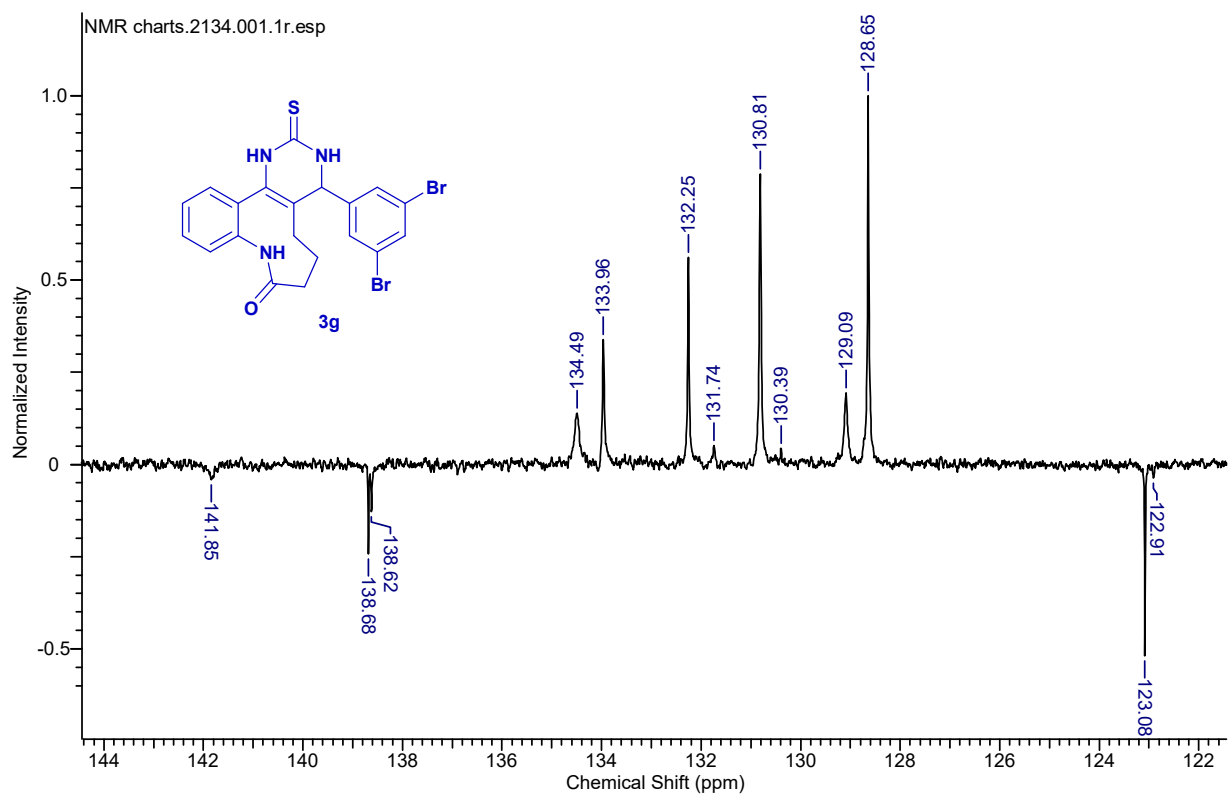

Fig. S33.  $^{13}\text{C}$ -NMR spectrum of compound **3g**.

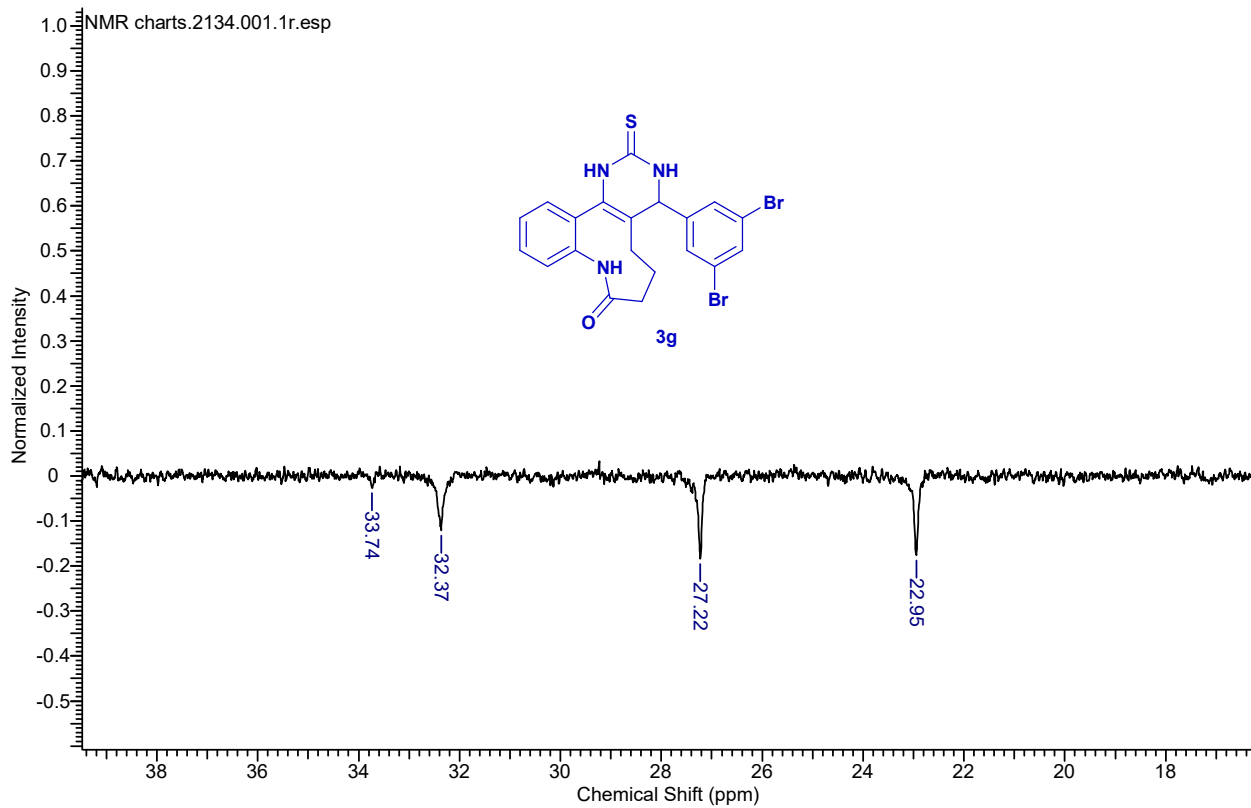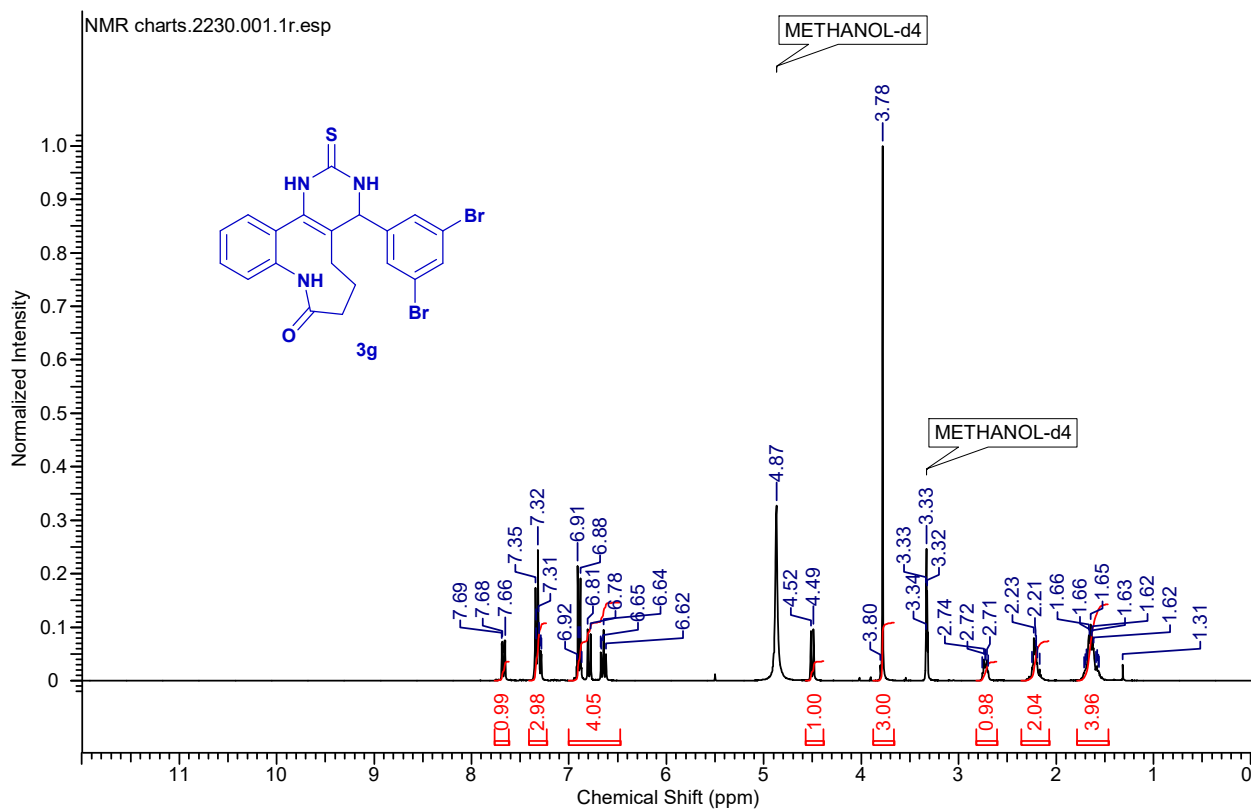

Fig. S33. <sup>13</sup>C-NMR spectrum of compound **3g**.

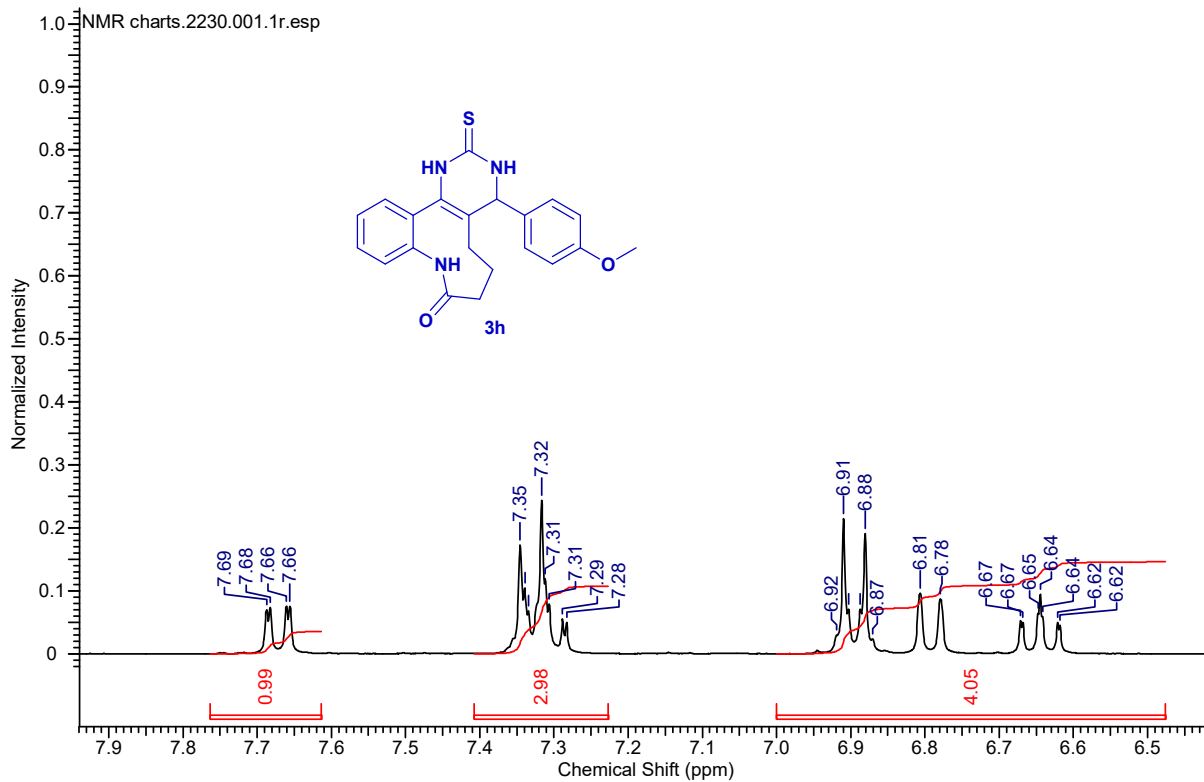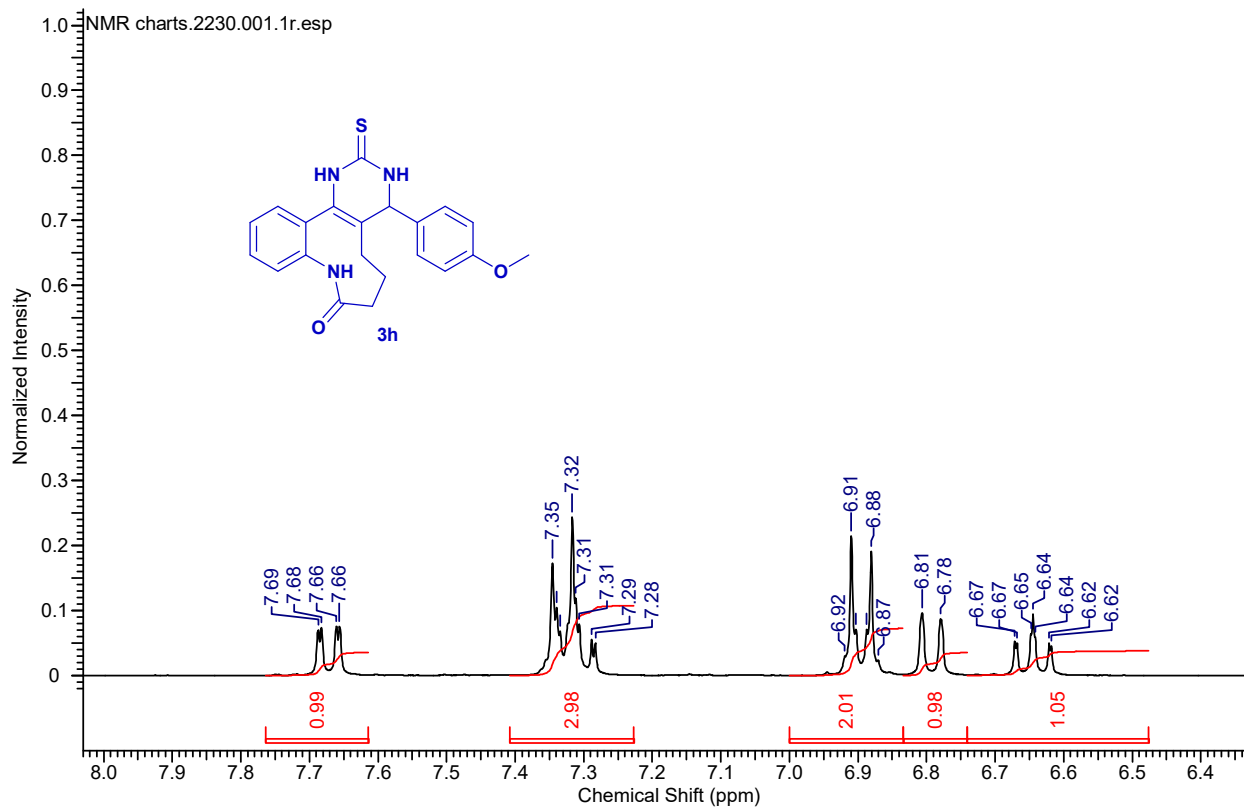

Fig. S34. <sup>1</sup>H-NMR spectrum of compound **3h**.

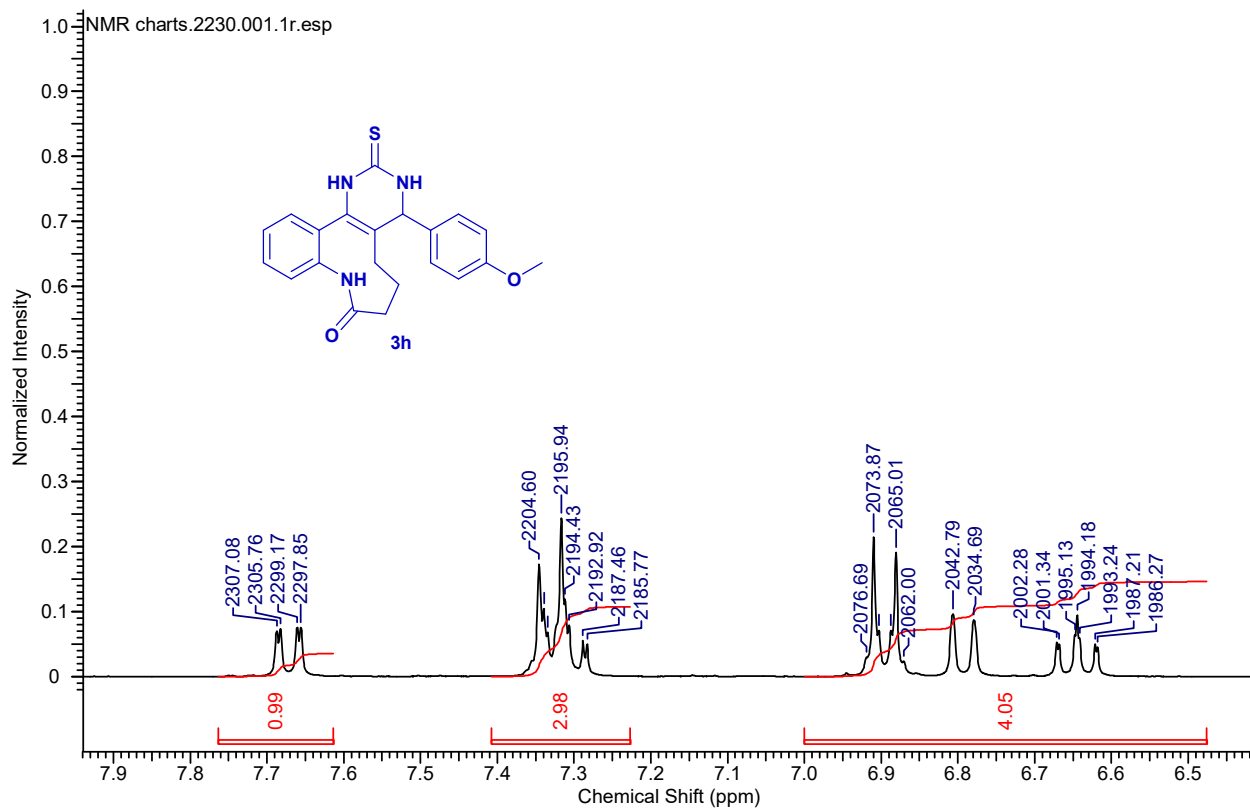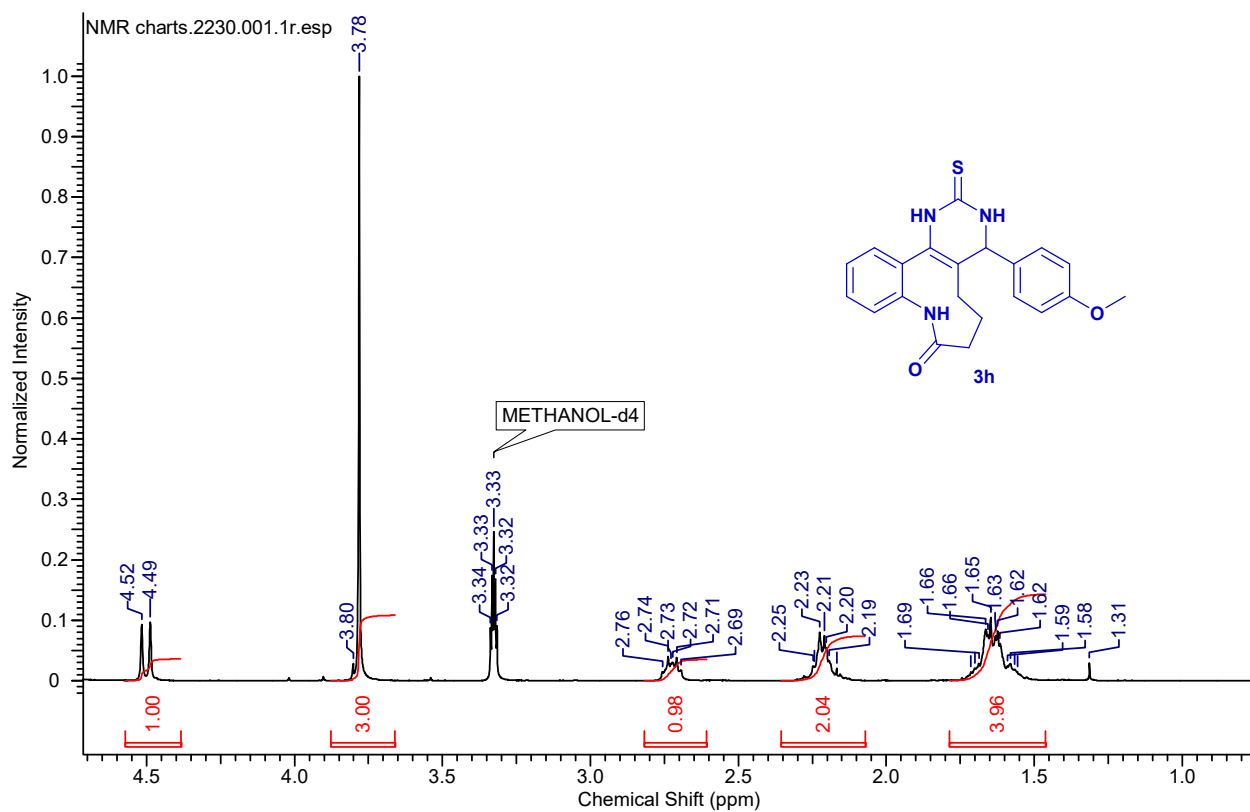

Fig. S34. <sup>1</sup>H-NMR spectrum of compound **3h**.

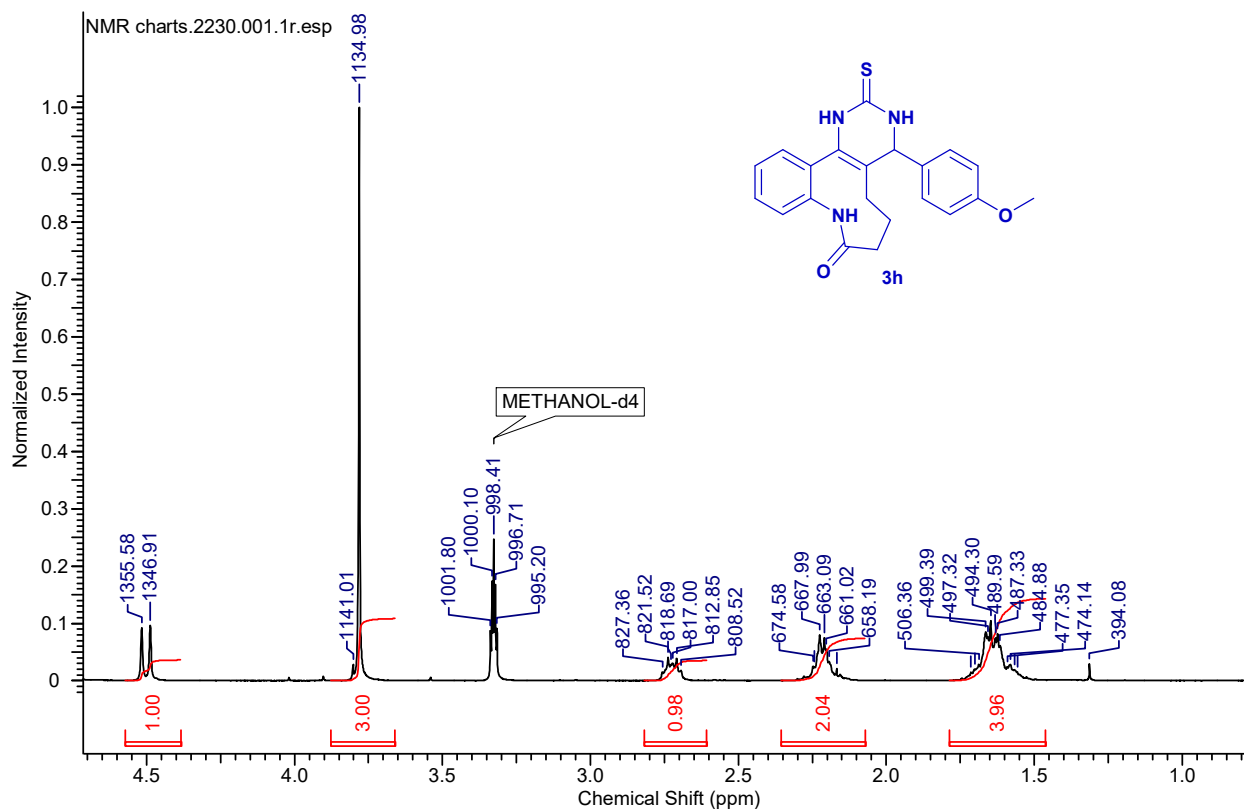

Fig. S34. <sup>1</sup>H-NMR spectrum of compound 3h.

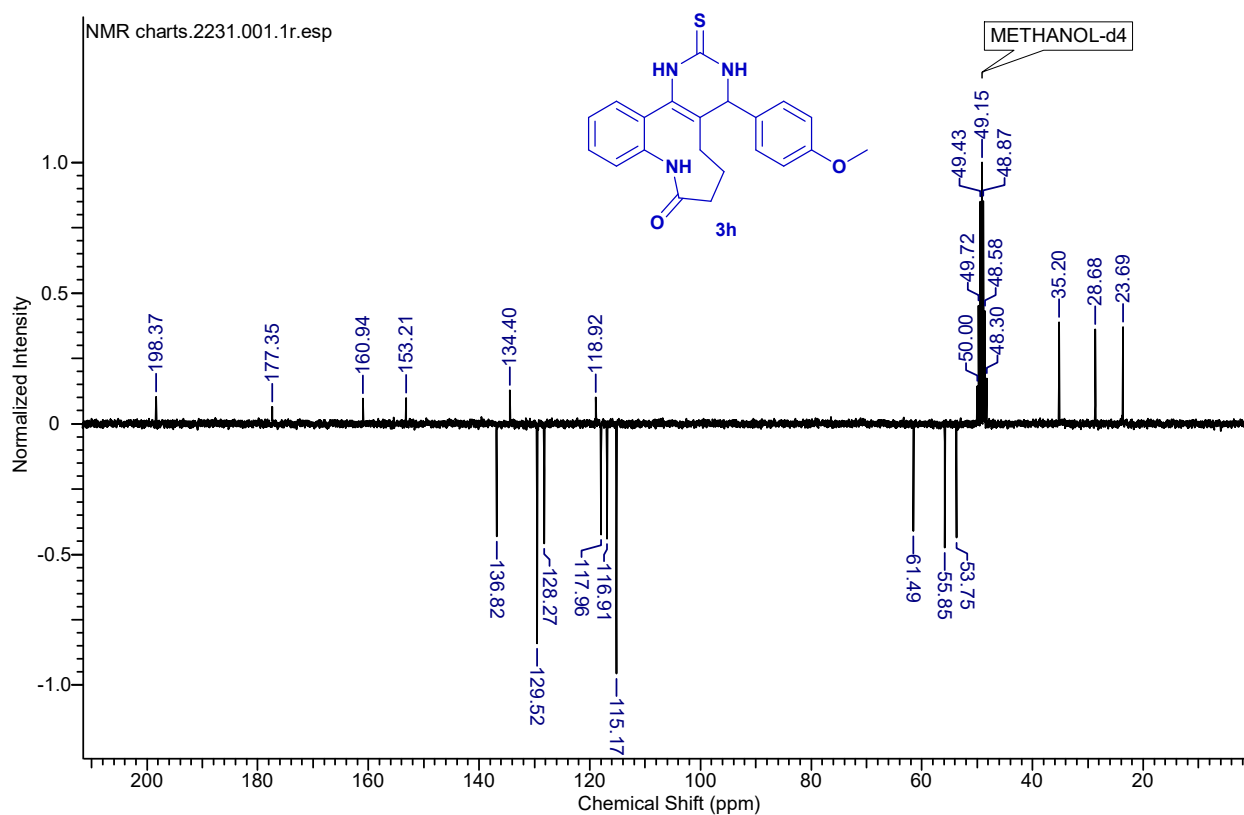

Fig. S35. <sup>13</sup>C-NMR spectrum of compound 3h.



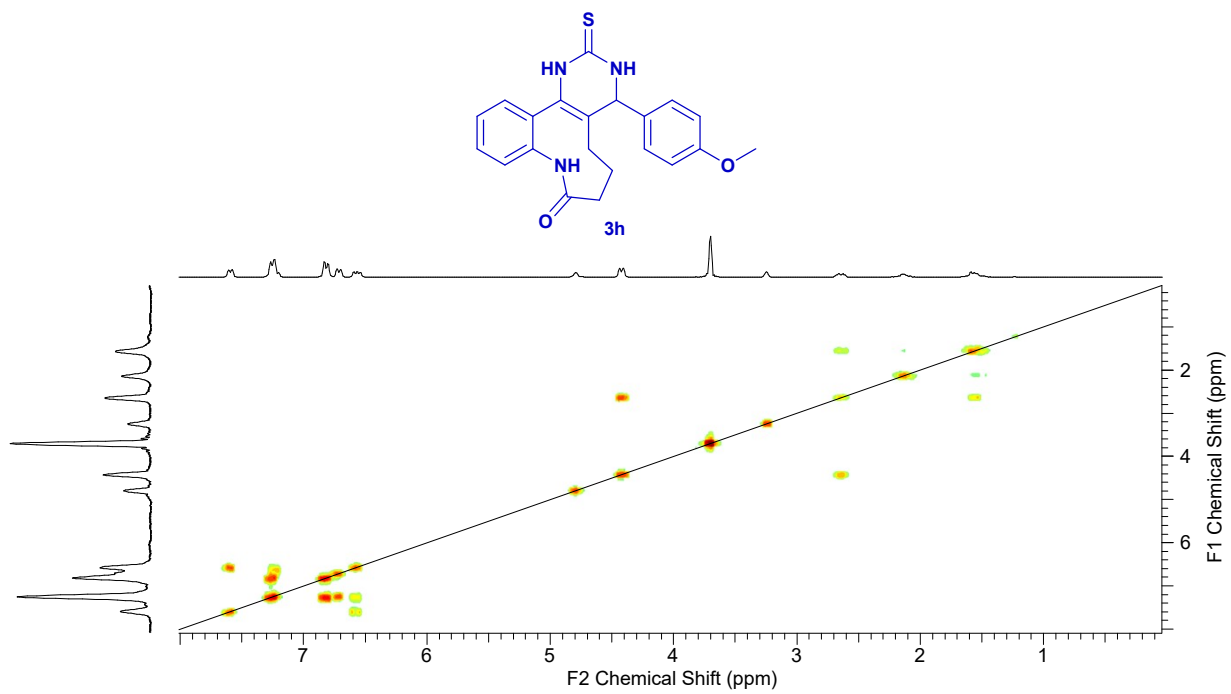

**Fig. S36.** 2D NMR spectrum (COSY) of compound **3h**.

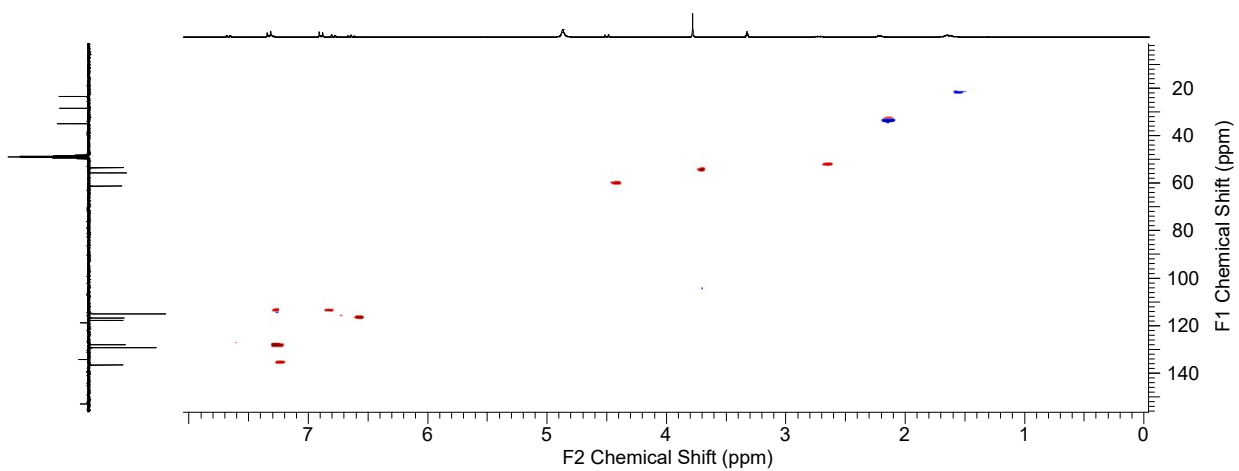

**Fig. S37.** 2D NMR spectrum (HSQC) of compound **3h**.

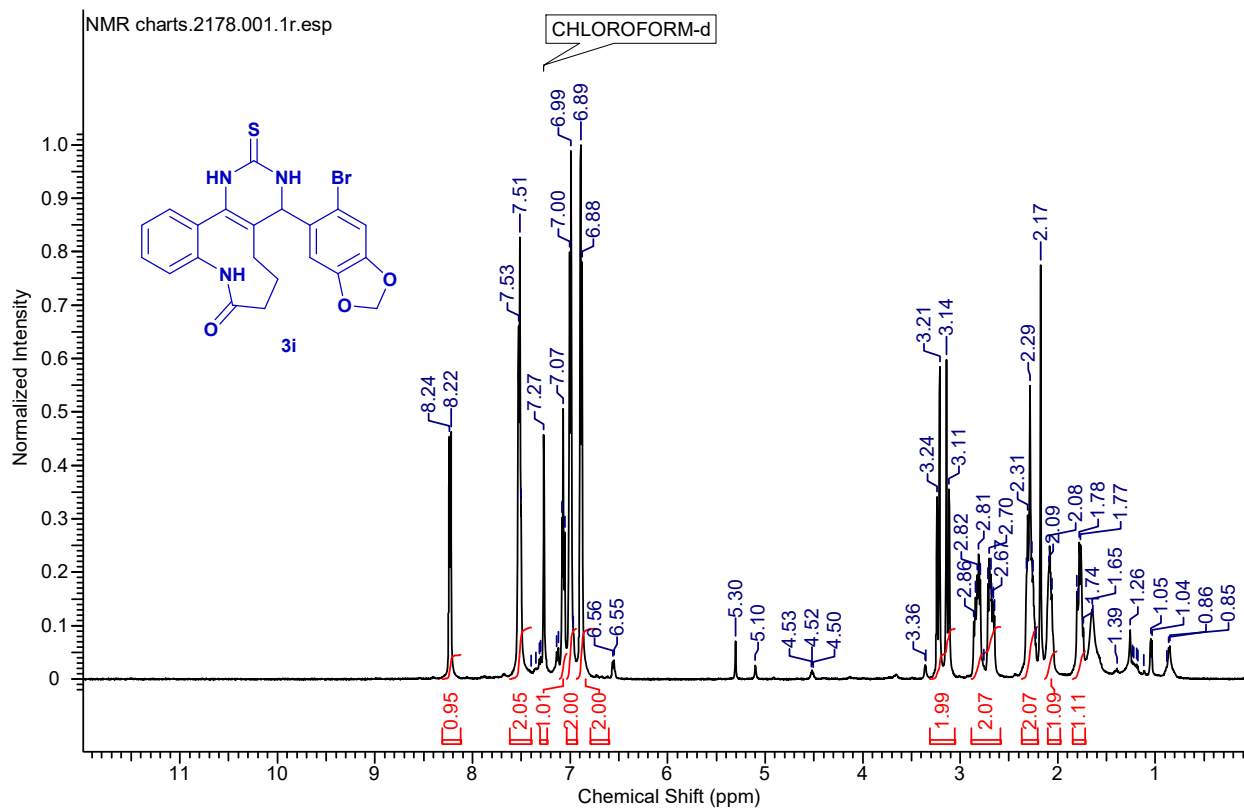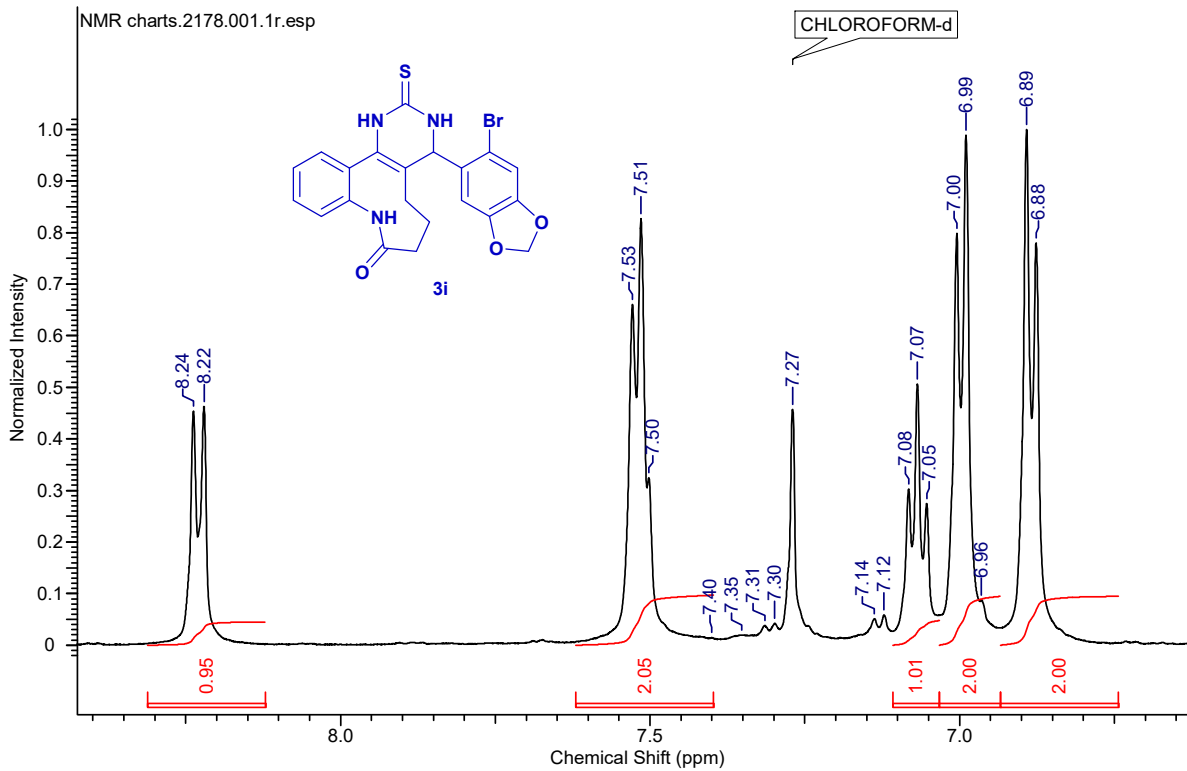

Fig. S38.  $^1\text{H}$ -NMR spectrum of compound **3i**.

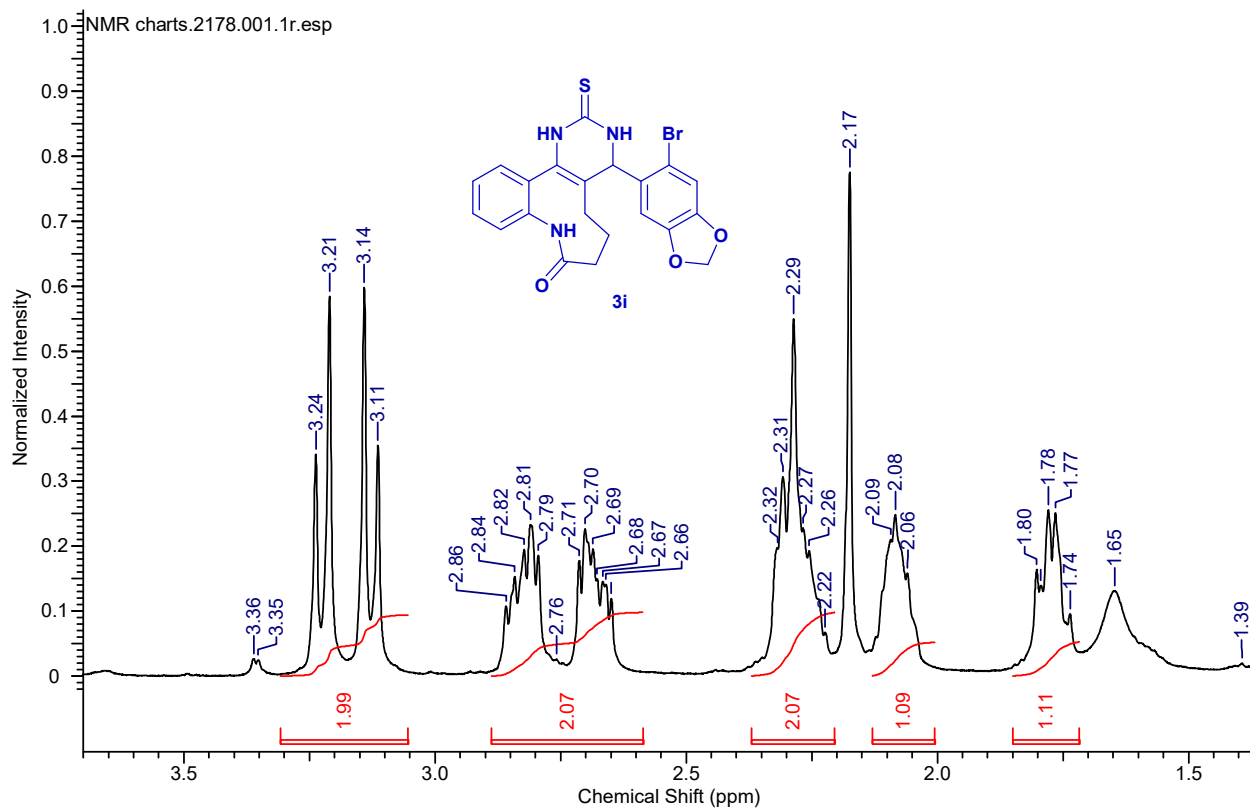

Fig. S38. <sup>1</sup>H-NMR spectrum of compound **3i**.

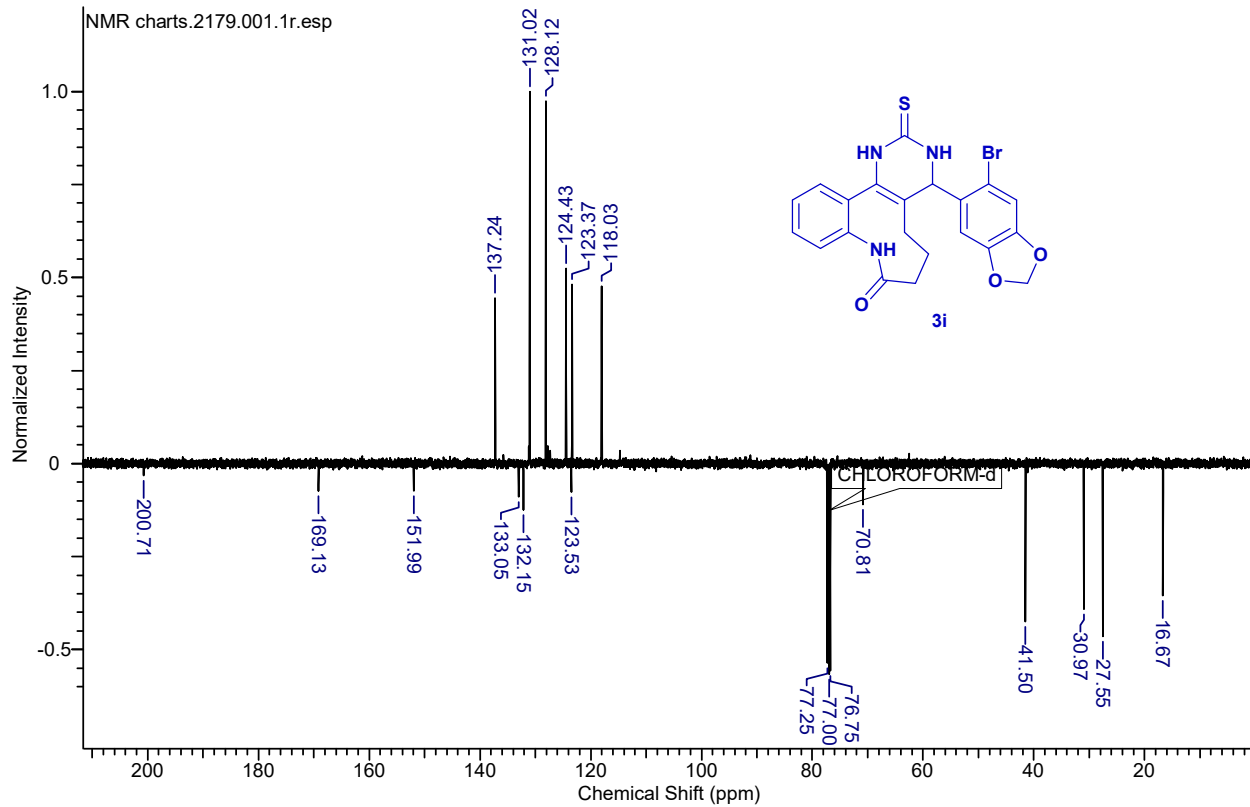

Fig. S39. <sup>13</sup>C-NMR spectrum of compound **3i**.

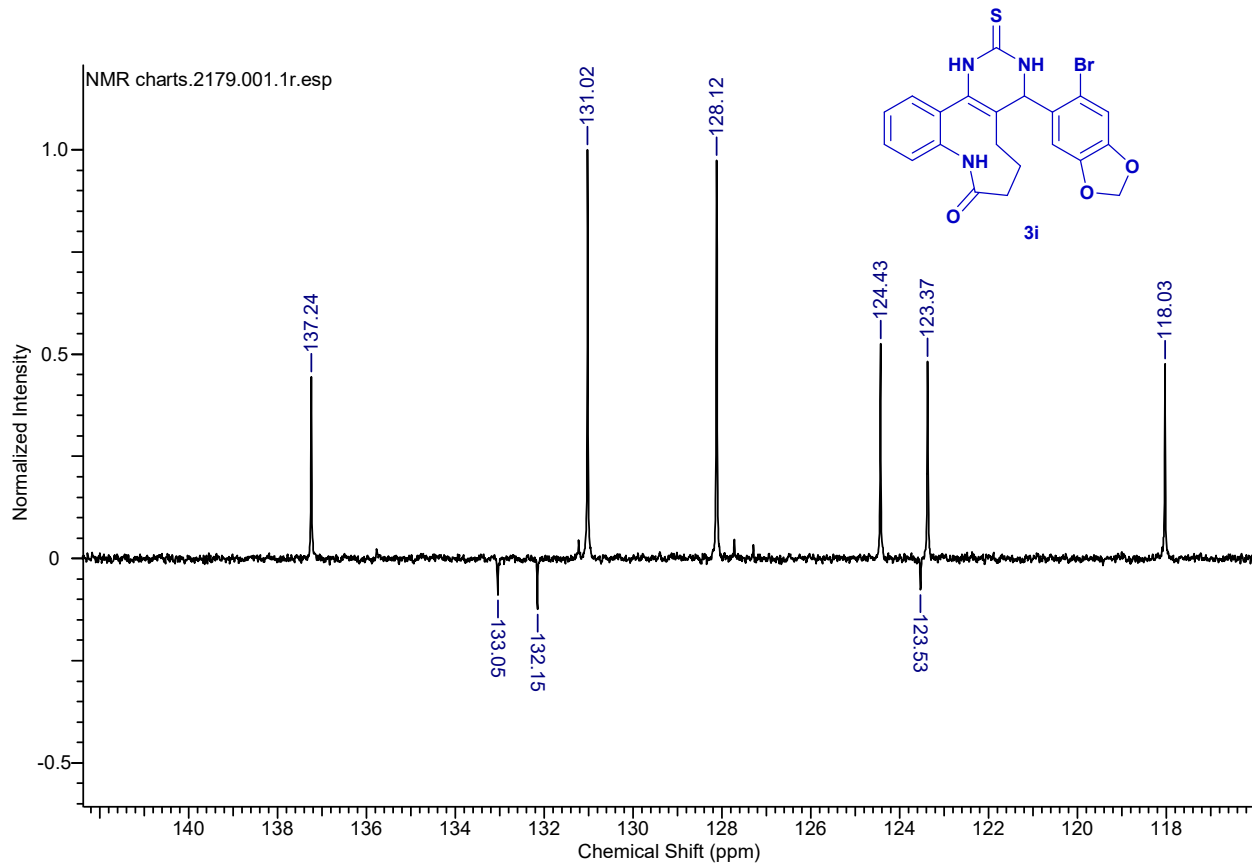

Fig. S39.  $^{13}\text{C}$ -NMR spectrum of compound **3i**.

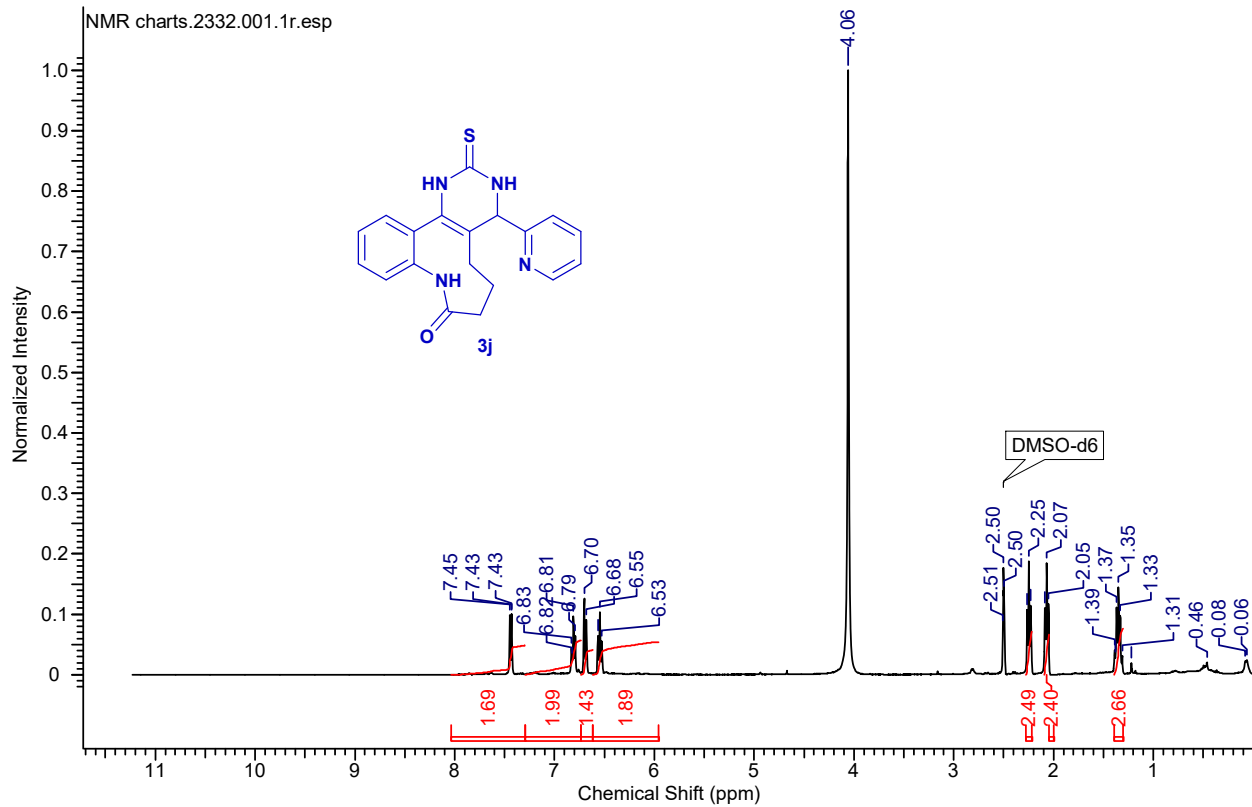

Fig. S40.  $^1\text{H}$ -NMR spectrum of compound **3j**.

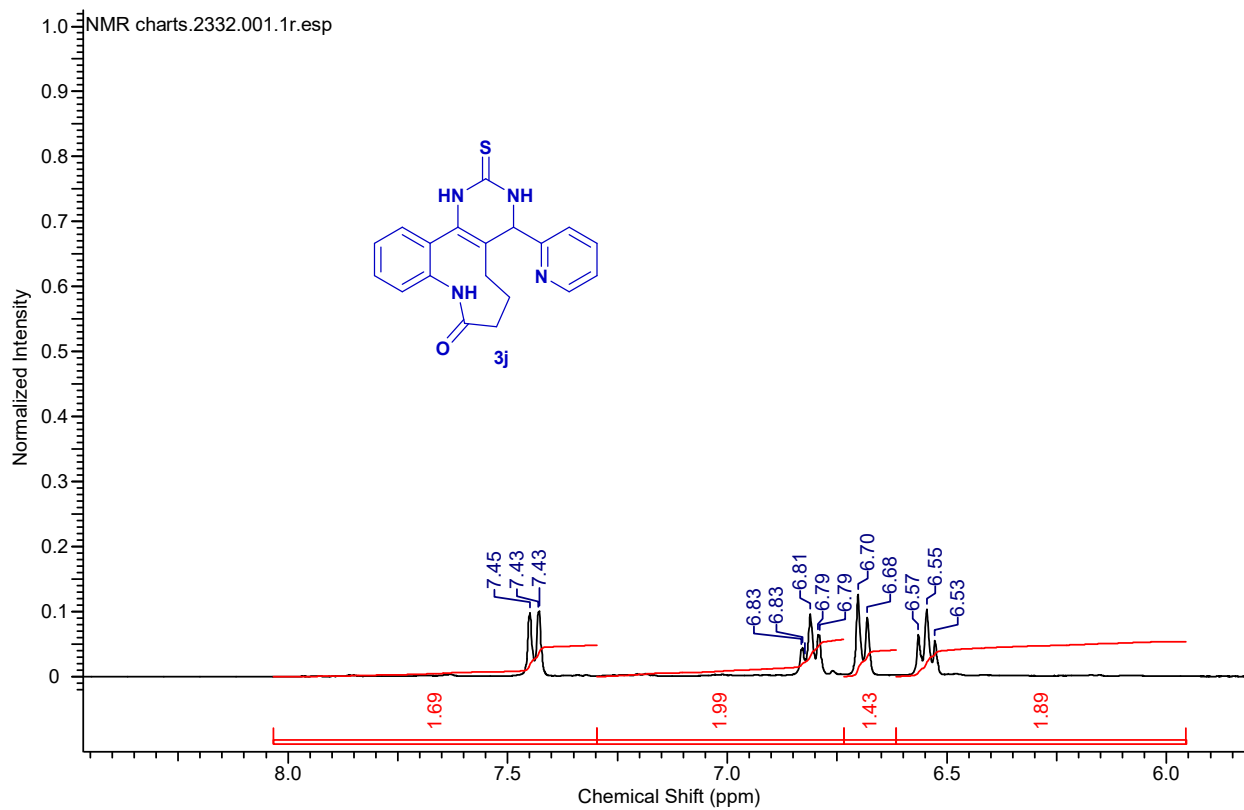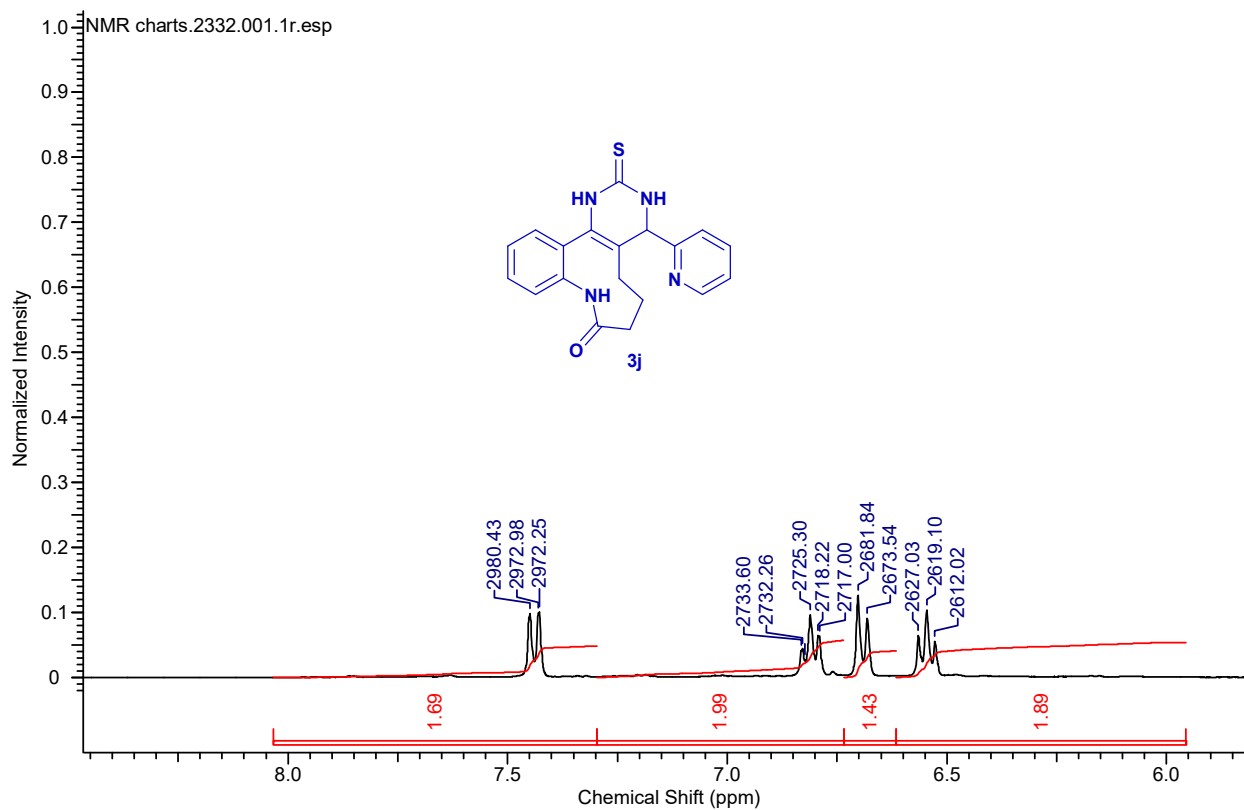

Fig. S40. <sup>1</sup>H-NMR spectrum of compound 3j.

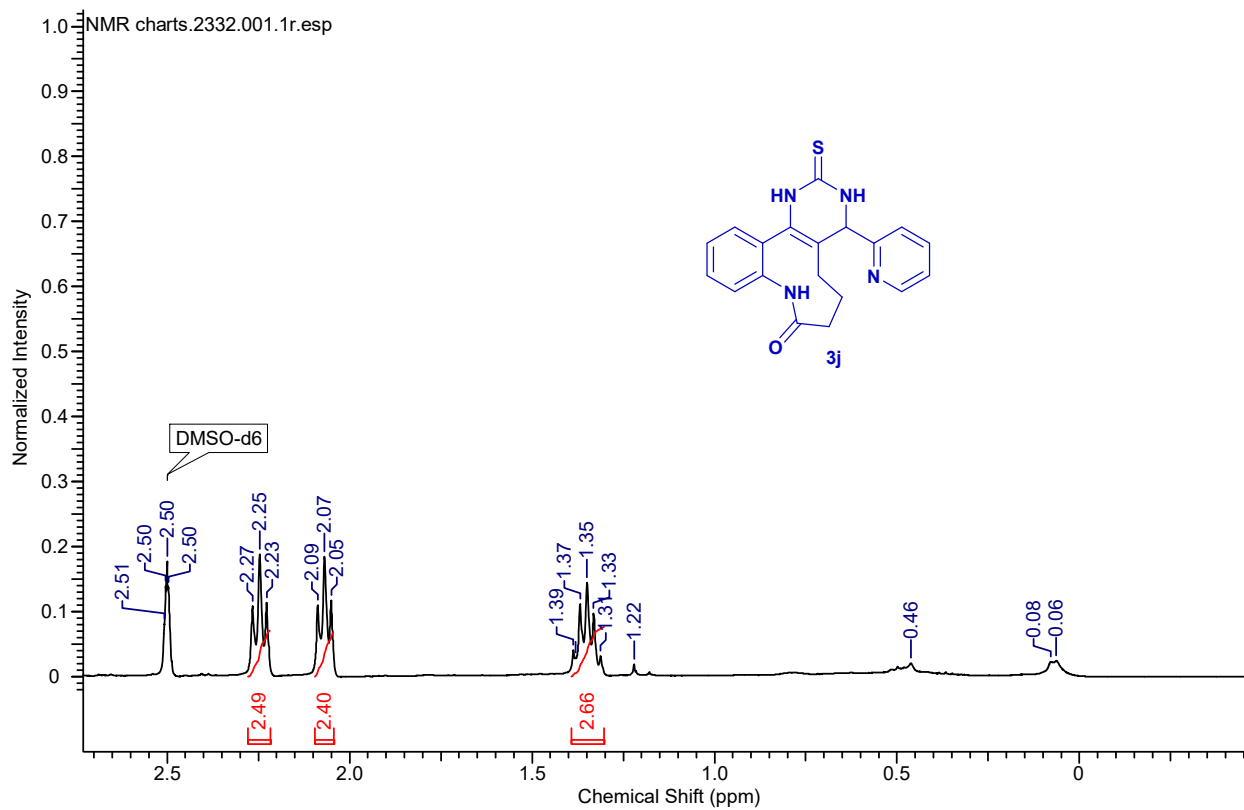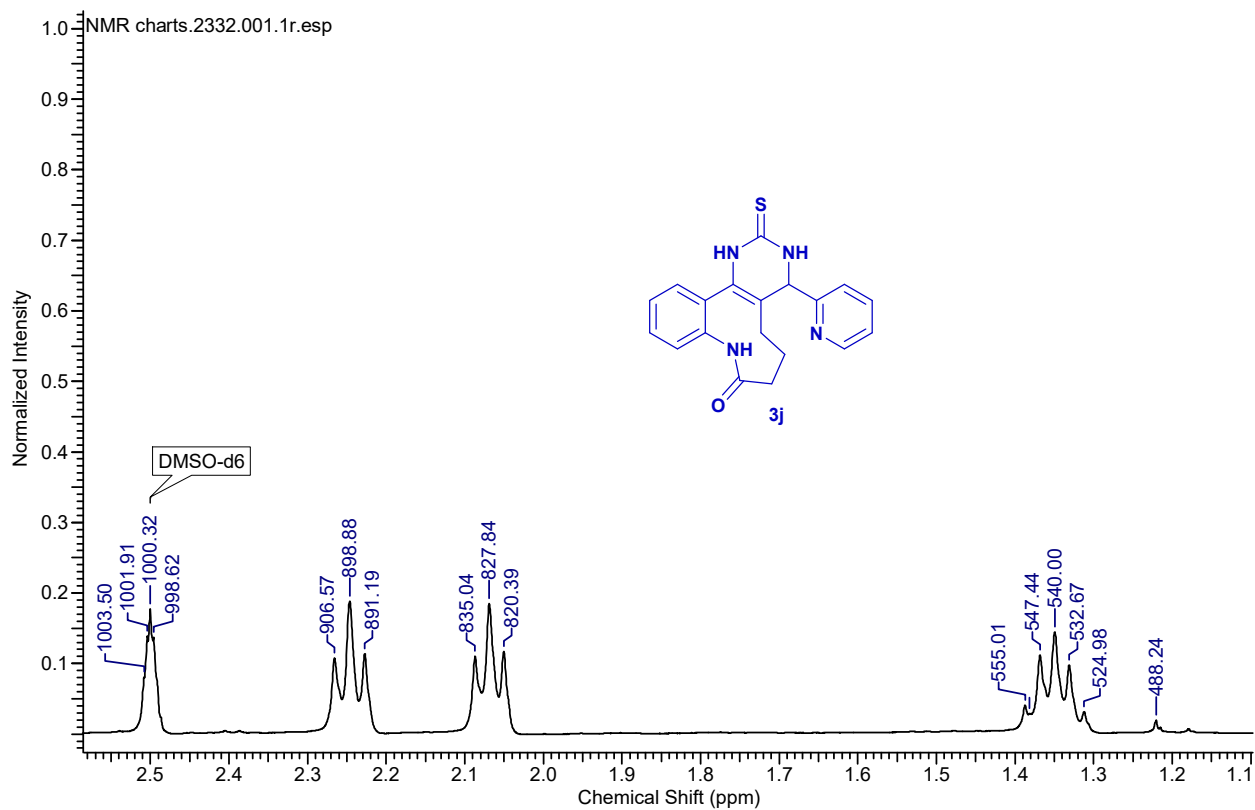

Fig. S40. <sup>1</sup>H-NMR spectrum of compound 3j.

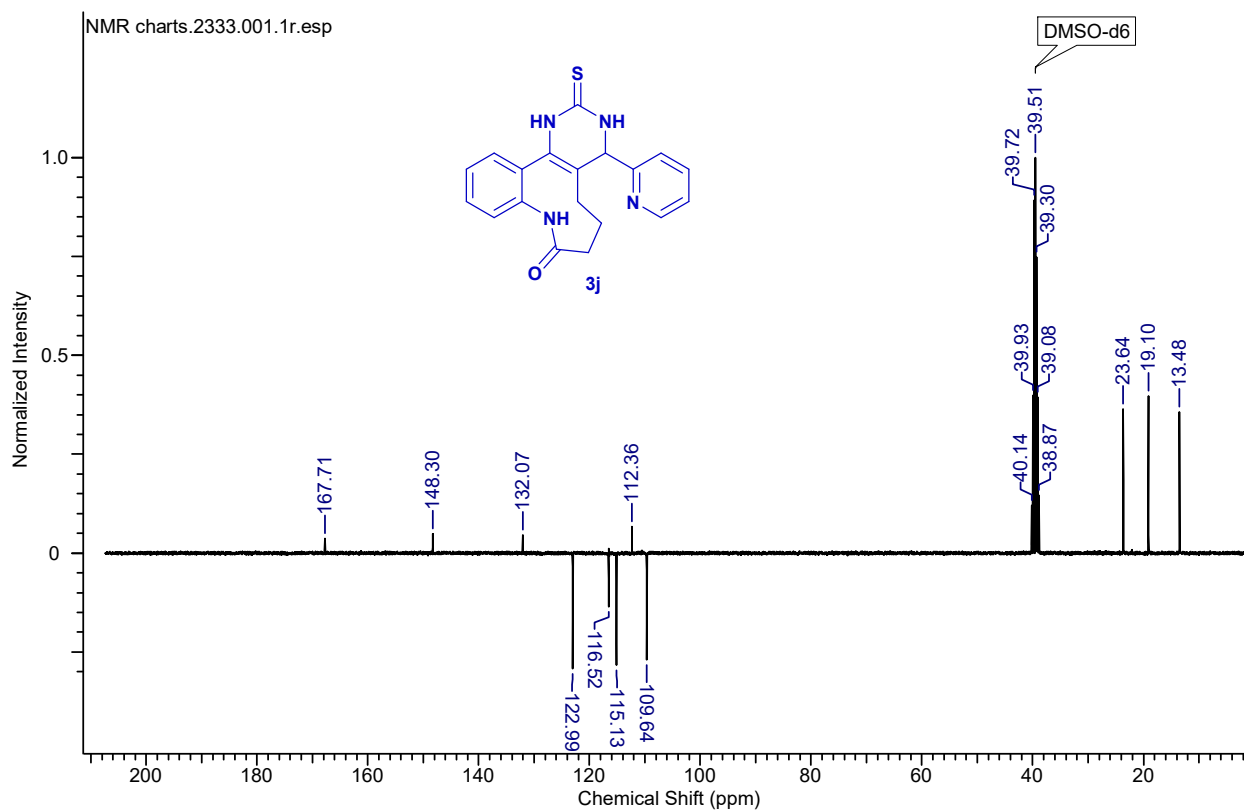

Fig. S41. <sup>13</sup>C-NMR spectrum of compound **3j**.

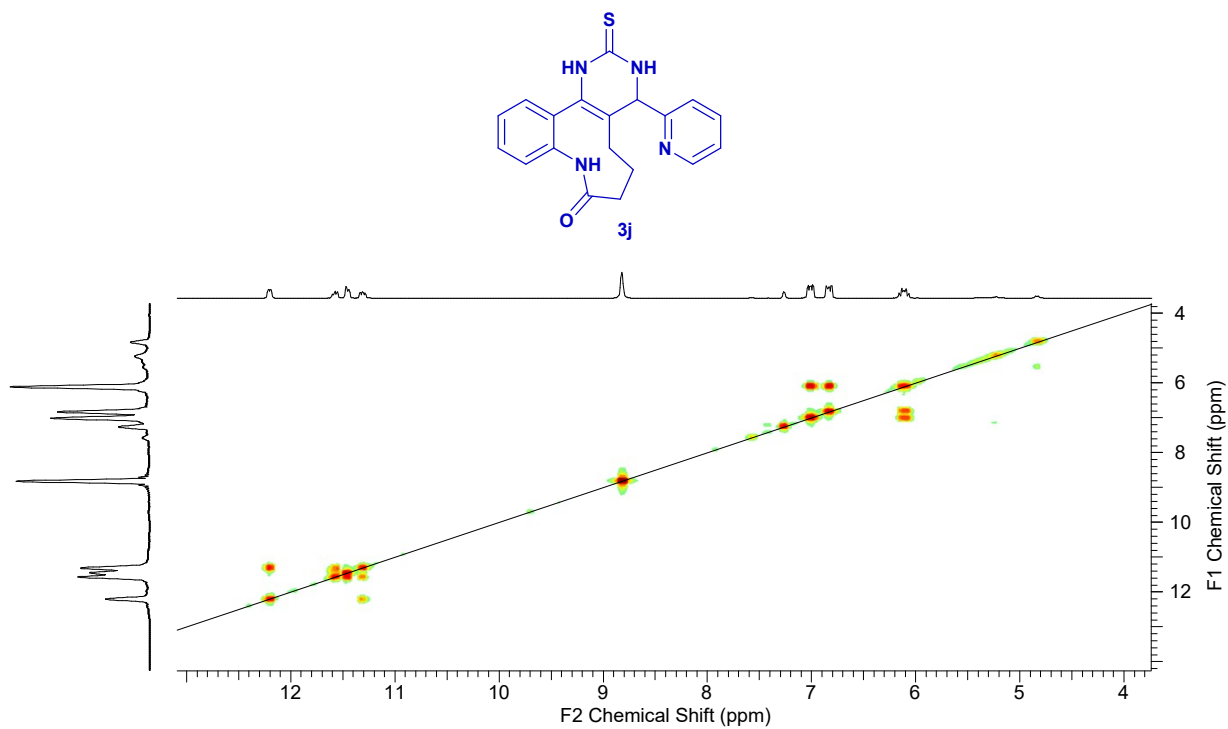

Fig. S42. 2D-NMR spectrum (COSY) of compound **3j**.

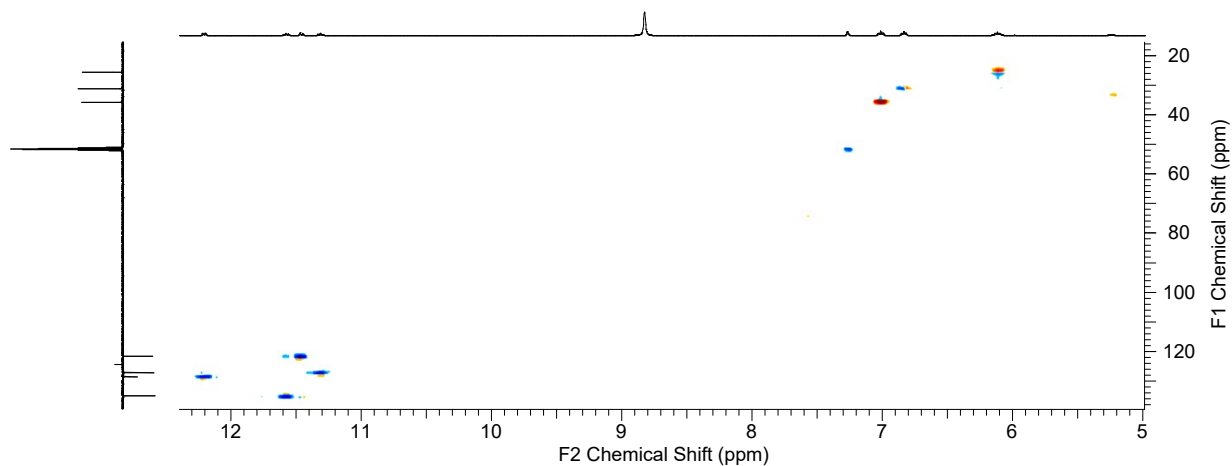

Fig. S43. 2D-NMR spectrum (HSQC) of compound 3j.

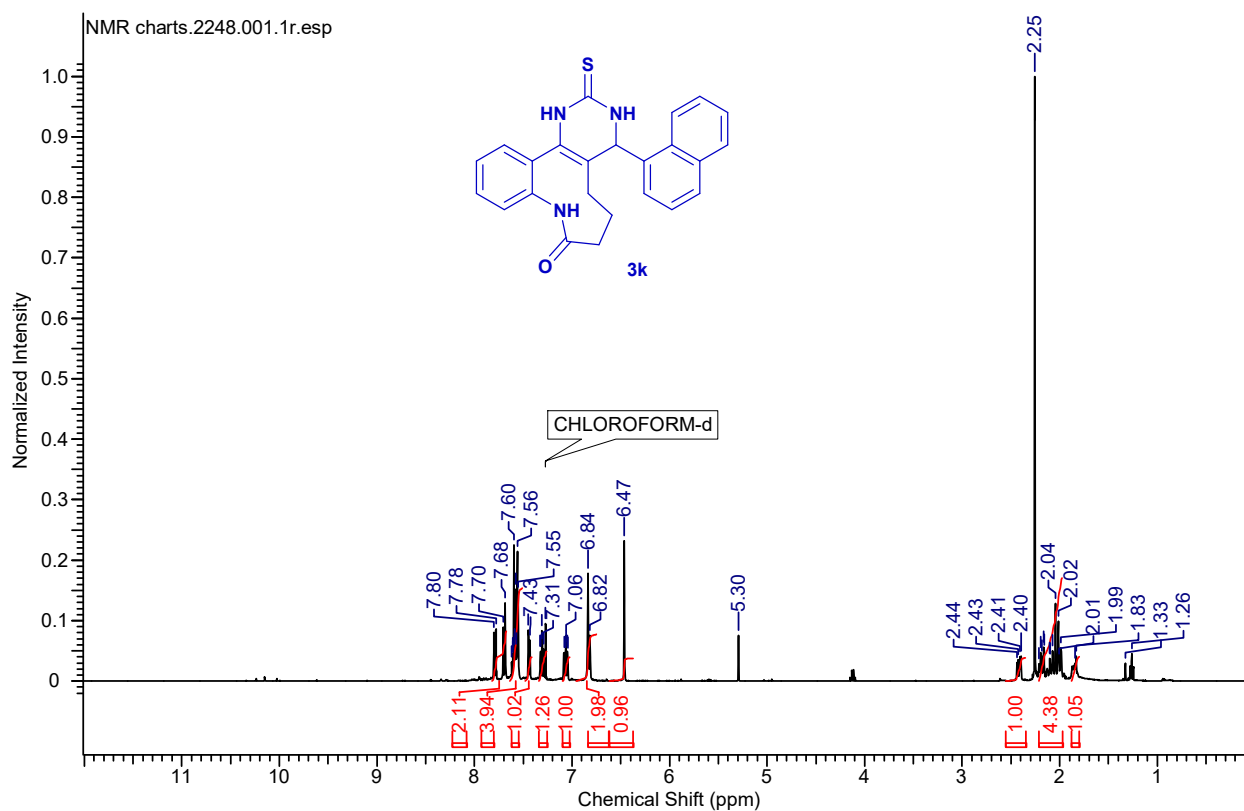

Fig. S44. <sup>1</sup>H-NMR spectrum of compound 3k.



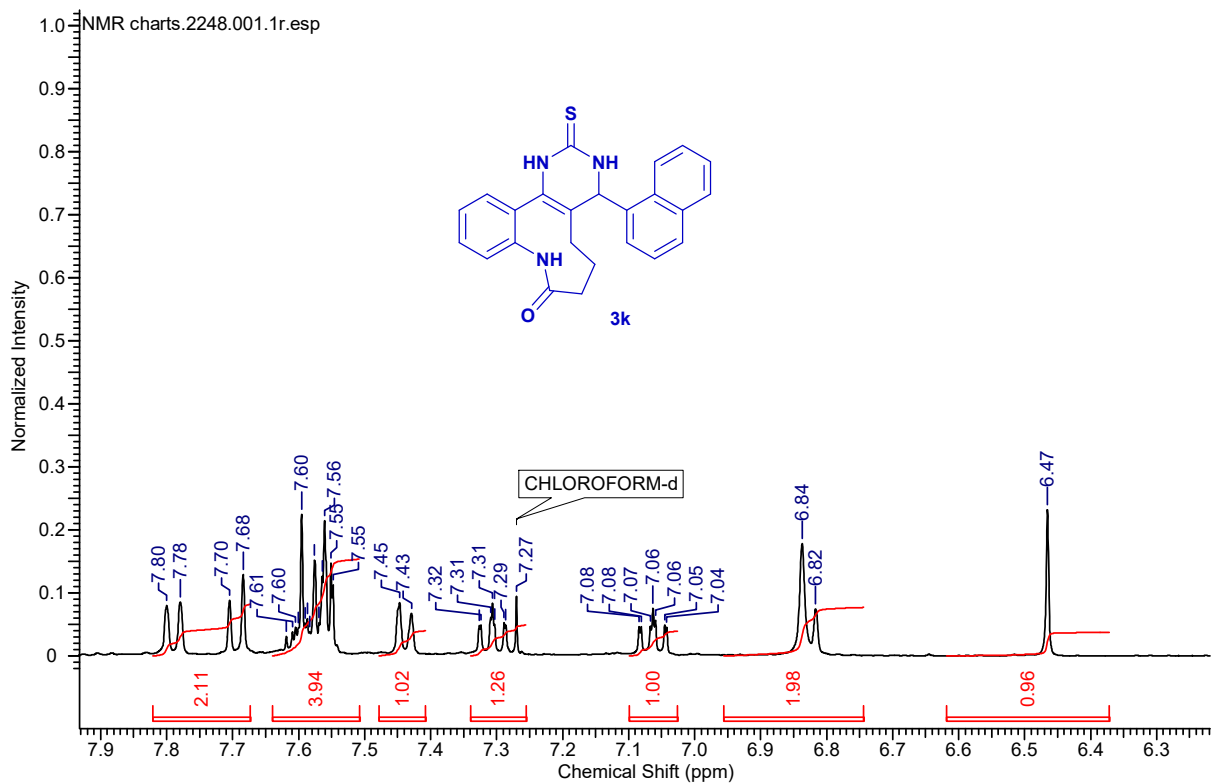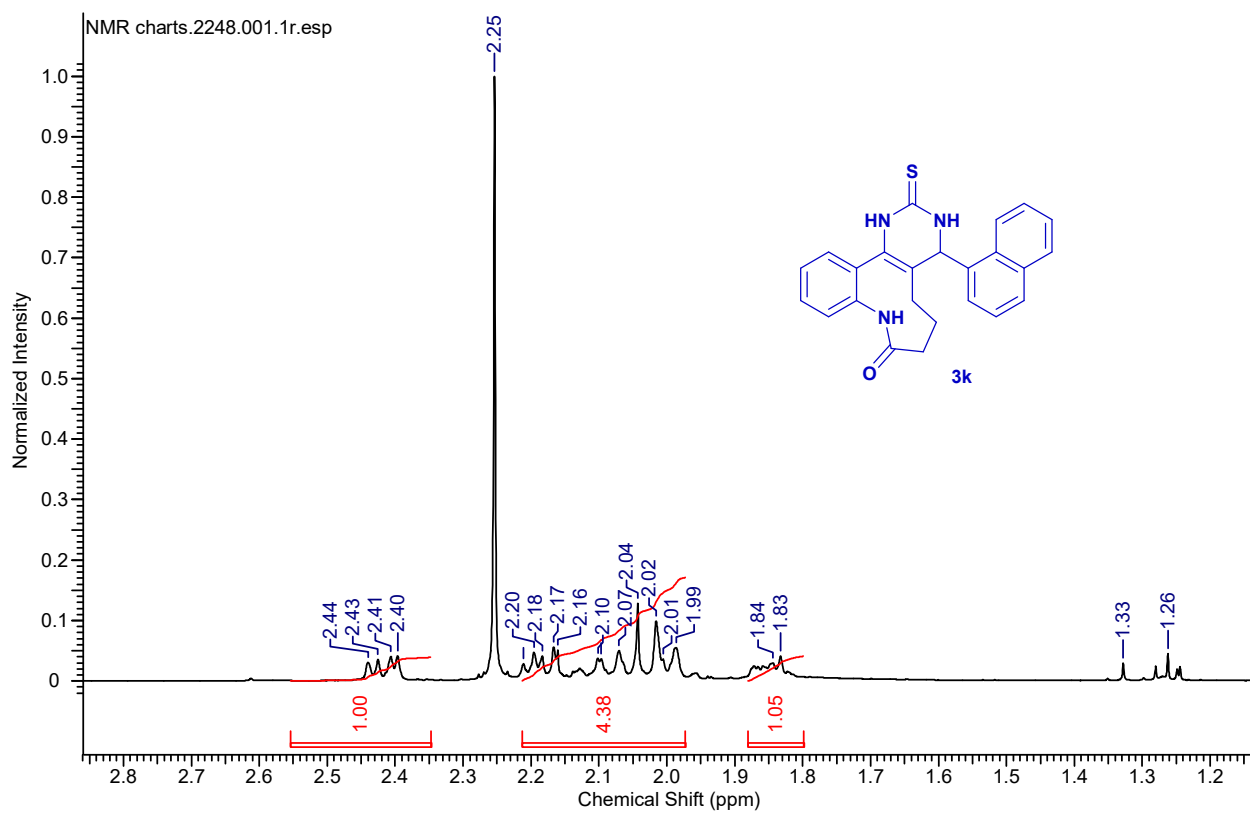

Fig. S44.  $^1\text{H}$ -NMR spectrum of compound **3k**.

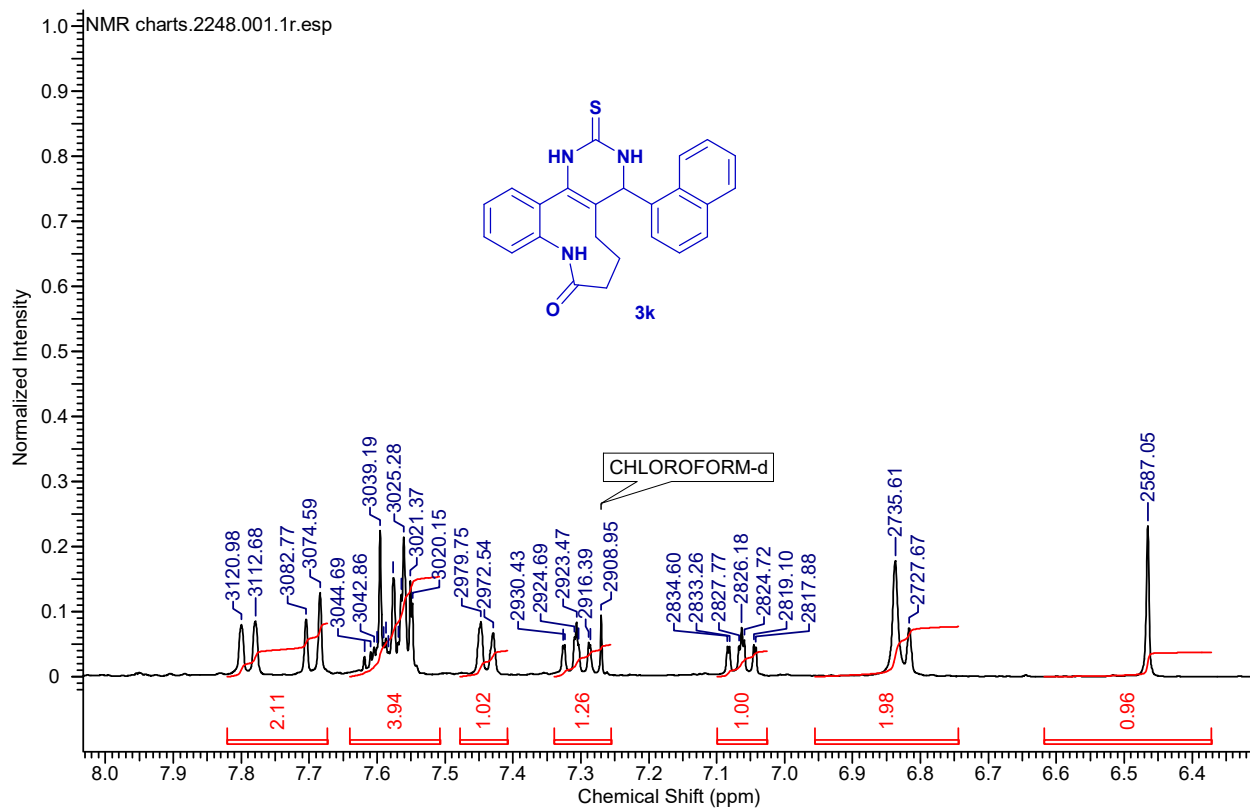

Fig. S44.  $^1\text{H}$ -NMR spectrum of compound **3k**.

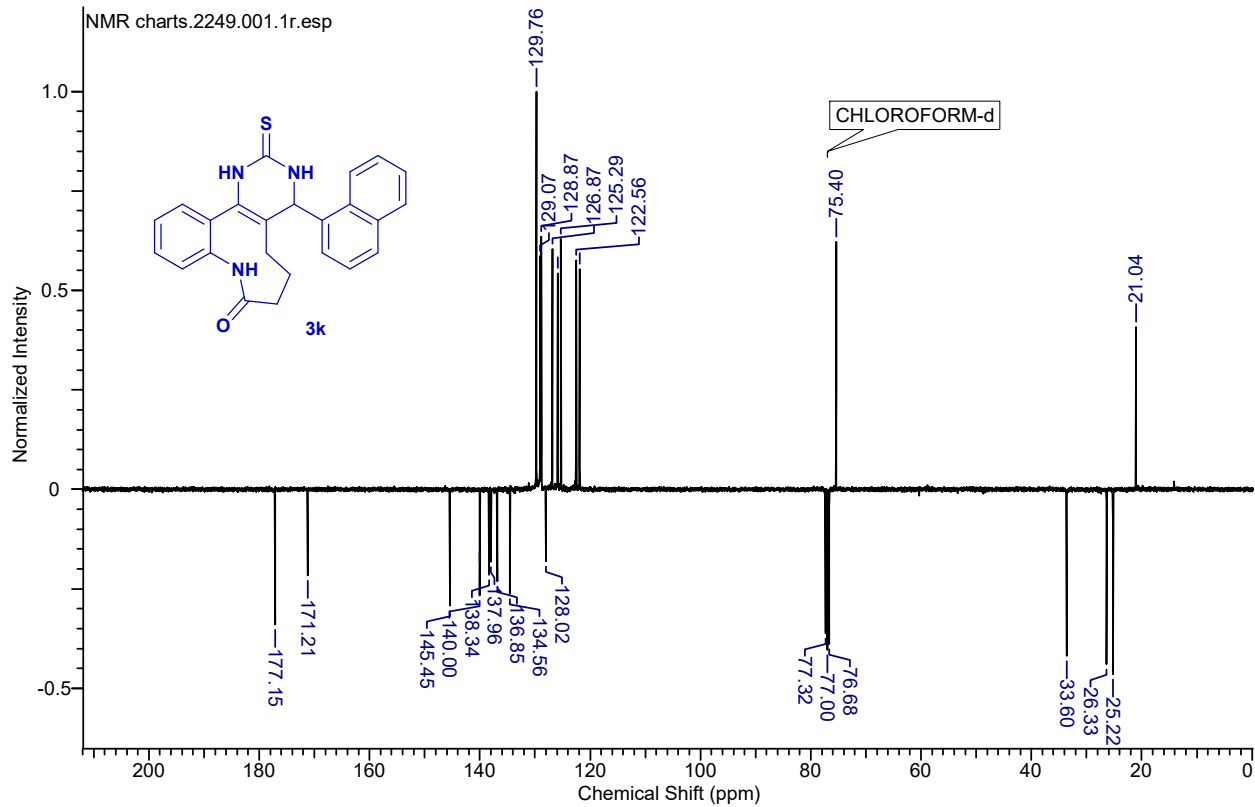

Fig. S45.  $^{13}\text{C}$ -NMR spectrum of compound **3k**.

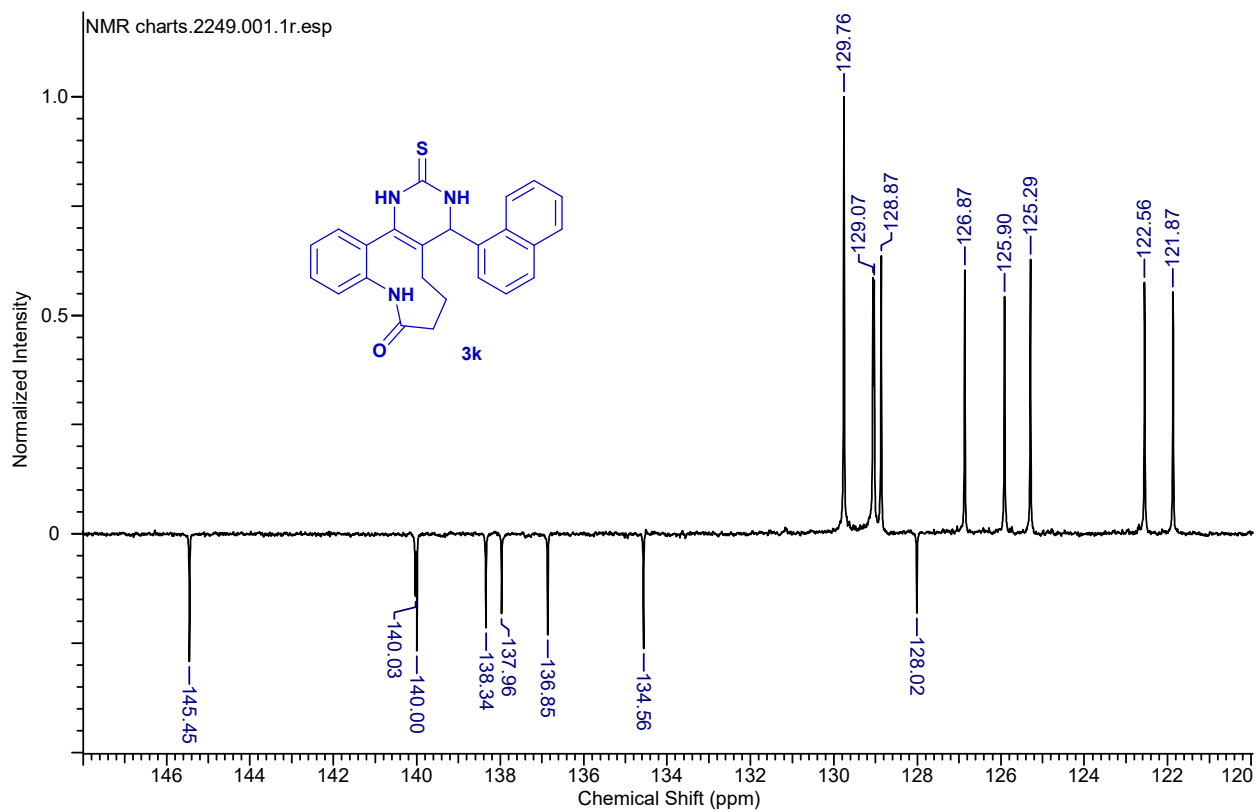

Fig. S45.  $^{13}\text{C}$ -NMR spectrum of compound **3k**.
